# Supplementary material
Source: publisher figshare collection journal article supplement (https://acs.figshare.com/ndownloader/files/3805096)
Supplement: Supplementary file 1 [file 3805096]

## Sheet: protein2GOslim
Rice Locus Name	GO-Group	GO-ID	Term
LOC_Os03g28330.4	C	GO:0005886	plasma membrane
LOC_Os03g28330.4	C	GO:0005829	cytosol
LOC_Os03g28330.4	F	GO:0016740	transferase activity
LOC_Os03g28330.4	C	GO:0005773	vacuole
LOC_Os03g28330.4	P	GO:0009987	cellular process
LOC_Os03g28330.4	P	GO:0005975	carbohydrate metabolic process
LOC_Os03g28330.4	P	GO:0009058	biosynthetic process
LOC_Os06g04270.1	C	GO:0009536	plastid
LOC_Os06g04270.1	F	GO:0016740	transferase activity
LOC_Os06g04270.1	P	GO:0008152	metabolic process
LOC_Os01g45274.1	P	GO:0009987	cellular process
LOC_Os01g45274.1	P	GO:0009628	response to abiotic stimulus
LOC_Os01g45274.1	P	GO:0008152	metabolic process
LOC_Os01g45274.1	F	GO:0003824	catalytic activity
LOC_Os01g45274.1	F	GO:0005515	protein binding
LOC_Os01g45274.1	C	GO:0009579	thylakoid
LOC_Os01g45274.1	C	GO:0009536	plastid
LOC_Os01g45274.1	P	GO:0009607	response to biotic stimulus
LOC_Os01g45274.1	P	GO:0006950	response to stress
LOC_Os01g45274.1	C	GO:0005576	extracellular region
LOC_Os01g45274.1	C	GO:0016020	membrane
LOC_Os12g42876.1	C	GO:0005773	vacuole
LOC_Os12g42876.1	C	GO:0009536	plastid
LOC_Os12g42876.1	P	GO:0009058	biosynthetic process
LOC_Os12g42876.1	C	GO:0005886	plasma membrane
LOC_Os12g42876.1	P	GO:0009987	cellular process
LOC_Os12g42876.1	P	GO:0009628	response to abiotic stimulus
LOC_Os12g42876.1	P	GO:0006950	response to stress
LOC_Os12g42876.1	C	GO:0005829	cytosol
LOC_Os12g42876.1	F	GO:0005488	binding
LOC_Os12g42876.1	F	GO:0016740	transferase activity
LOC_Os12g42876.1	C	GO:0005777	peroxisome
LOC_Os12g42876.1	C	GO:0005576	extracellular region
LOC_Os04g40950.1	C	GO:0009536	plastid
LOC_Os04g40950.1	C	GO:0005886	plasma membrane
LOC_Os04g40950.1	C	GO:0005739	mitochondrion
LOC_Os04g40950.1	C	GO:0005829	cytosol
LOC_Os04g40950.1	F	GO:0005488	binding
LOC_Os04g40950.1	C	GO:0005730	nucleolus
LOC_Os04g40950.1	C	GO:0005618	cell wall
LOC_Os04g40950.1	P	GO:0009607	response to biotic stimulus
LOC_Os04g40950.1	P	GO:0006950	response to stress
LOC_Os04g40950.1	P	GO:0009056	catabolic process
LOC_Os04g40950.1	P	GO:0006091	generation of precursor metabolites and energy
LOC_Os04g40950.1	P	GO:0005975	carbohydrate metabolic process
LOC_Os04g40950.1	P	GO:0009058	biosynthetic process
LOC_Os12g17600.1	C	GO:0005829	cytosol
LOC_Os12g17600.1	C	GO:0005840	ribosome
LOC_Os12g17600.1	P	GO:0008152	metabolic process
LOC_Os12g17600.1	F	GO:0003824	catalytic activity
LOC_Os12g17600.1	P	GO:0006950	response to stress
LOC_Os12g17600.1	F	GO:0005488	binding
LOC_Os12g17600.1	P	GO:0009628	response to abiotic stimulus
LOC_Os12g17600.1	C	GO:0009579	thylakoid
LOC_Os12g17600.1	C	GO:0009536	plastid
LOC_Os12g17600.1	C	GO:0005576	extracellular region
LOC_Os12g17600.1	C	GO:0016020	membrane
LOC_Os12g42884.3	C	GO:0005773	vacuole
LOC_Os12g42884.3	C	GO:0009536	plastid
LOC_Os12g42884.3	P	GO:0009058	biosynthetic process
LOC_Os12g42884.3	C	GO:0005886	plasma membrane
LOC_Os12g42884.3	P	GO:0009987	cellular process
LOC_Os12g42884.3	P	GO:0009628	response to abiotic stimulus
LOC_Os12g42884.3	P	GO:0006950	response to stress
LOC_Os12g42884.3	C	GO:0005829	cytosol
LOC_Os12g42884.3	F	GO:0005488	binding
LOC_Os12g42884.3	F	GO:0016740	transferase activity
LOC_Os12g42884.3	C	GO:0005777	peroxisome
LOC_Os12g42884.3	C	GO:0005576	extracellular region
LOC_Os11g26850.2	P	GO:0009790	embryo development
LOC_Os11g26850.2	P	GO:0009791	post-embryonic development
LOC_Os11g26850.2	P	GO:0000003	reproduction
LOC_Os11g26850.2	C	GO:0005886	plasma membrane
LOC_Os11g26850.2	F	GO:0005488	binding
LOC_Os11g26850.2	C	GO:0005829	cytosol
LOC_Os11g26850.2	P	GO:0009058	biosynthetic process
LOC_Os11g26850.2	P	GO:0006139	nucleobase-containing compound metabolic process
LOC_Os11g26850.2	P	GO:0016043	cellular component organization
LOC_Os11g26850.2	P	GO:0040029	regulation of gene expression, epigenetic
LOC_Os11g26850.2	C	GO:0005773	vacuole
LOC_Os11g26850.2	F	GO:0016787	hydrolase activity
LOC_Os05g06770.1	P	GO:0006464	cellular protein modification process
LOC_Os05g06770.1	F	GO:0005198	structural molecule activity
LOC_Os05g06770.1	C	GO:0005829	cytosol
LOC_Os05g06770.1	C	GO:0005840	ribosome
LOC_Os05g06770.1	P	GO:0009056	catabolic process
LOC_Os06g44080.1	C	GO:0005886	plasma membrane
LOC_Os06g44080.1	P	GO:0009790	embryo development
LOC_Os06g44080.1	C	GO:0005829	cytosol
LOC_Os06g44080.1	P	GO:0006464	cellular protein modification process
LOC_Os06g44080.1	P	GO:0009719	response to endogenous stimulus
LOC_Os06g44080.1	P	GO:0009058	biosynthetic process
LOC_Os09g30418.1	P	GO:0006139	nucleobase-containing compound metabolic process
LOC_Os09g30418.1	P	GO:0009056	catabolic process
LOC_Os09g30418.1	C	GO:0005618	cell wall
LOC_Os09g30418.1	P	GO:0009908	flower development
LOC_Os09g30418.1	P	GO:0009607	response to biotic stimulus
LOC_Os09g30418.1	C	GO:0005634	nucleus
LOC_Os09g30418.1	P	GO:0019538	protein metabolic process
LOC_Os09g30418.1	F	GO:0016787	hydrolase activity
LOC_Os09g30418.1	C	GO:0005739	mitochondrion
LOC_Os09g30418.1	C	GO:0005829	cytosol
LOC_Os09g30418.1	F	GO:0005515	protein binding
LOC_Os09g30418.1	F	GO:0000166	nucleotide binding
LOC_Os09g30418.1	P	GO:0009628	response to abiotic stimulus
LOC_Os09g30418.1	P	GO:0006950	response to stress
LOC_Os08g39140.1	P	GO:0006139	nucleobase-containing compound metabolic process
LOC_Os08g39140.1	P	GO:0009056	catabolic process
LOC_Os08g39140.1	C	GO:0005618	cell wall
LOC_Os08g39140.1	P	GO:0009908	flower development
LOC_Os08g39140.1	P	GO:0009607	response to biotic stimulus
LOC_Os08g39140.1	C	GO:0005634	nucleus
LOC_Os08g39140.1	P	GO:0019538	protein metabolic process
LOC_Os08g39140.1	F	GO:0016787	hydrolase activity
LOC_Os08g39140.1	C	GO:0005739	mitochondrion
LOC_Os08g39140.1	C	GO:0005829	cytosol
LOC_Os08g39140.1	F	GO:0005515	protein binding
LOC_Os08g39140.1	F	GO:0000166	nucleotide binding
LOC_Os08g39140.1	P	GO:0009628	response to abiotic stimulus
LOC_Os08g39140.1	P	GO:0006950	response to stress
LOC_Os04g56160.1	C	GO:0005886	plasma membrane
LOC_Os04g56160.1	F	GO:0005215	transporter activity
LOC_Os04g56160.1	F	GO:0016787	hydrolase activity
LOC_Os04g56160.1	P	GO:0009056	catabolic process
LOC_Os04g56160.1	F	GO:0005515	protein binding
LOC_Os04g56160.1	C	GO:0005773	vacuole
LOC_Os04g56160.1	P	GO:0009058	biosynthetic process
LOC_Os04g56160.1	P	GO:0006139	nucleobase-containing compound metabolic process
LOC_Os04g56160.1	P	GO:0006810	transport
LOC_Os10g08550.3	P	GO:0009719	response to endogenous stimulus
LOC_Os10g08550.3	P	GO:0008152	metabolic process
LOC_Os10g08550.3	C	GO:0005634	nucleus
LOC_Os10g08550.3	C	GO:0009536	plastid
LOC_Os10g08550.3	C	GO:0005886	plasma membrane
LOC_Os10g08550.3	C	GO:0005739	mitochondrion
LOC_Os10g08550.3	P	GO:0006950	response to stress
LOC_Os10g08550.3	C	GO:0005829	cytosol
LOC_Os10g08550.3	P	GO:0009628	response to abiotic stimulus
LOC_Os10g08550.3	F	GO:0003824	catalytic activity
LOC_Os10g08550.3	F	GO:0003677	DNA binding
LOC_Os10g08550.3	C	GO:0005576	extracellular region
LOC_Os10g30580.1	F	GO:0016787	hydrolase activity
LOC_Os10g30580.1	P	GO:0006139	nucleobase-containing compound metabolic process
LOC_Os10g30580.1	P	GO:0009056	catabolic process
LOC_Os10g30580.1	C	GO:0005829	cytosol
LOC_Os10g30580.1	C	GO:0005618	cell wall
LOC_Os10g30580.1	F	GO:0005515	protein binding
LOC_Os06g09450.4	C	GO:0005886	plasma membrane
LOC_Os06g09450.4	C	GO:0005829	cytosol
LOC_Os06g09450.4	F	GO:0016740	transferase activity
LOC_Os06g09450.4	C	GO:0005773	vacuole
LOC_Os06g09450.4	P	GO:0009987	cellular process
LOC_Os06g09450.4	P	GO:0005975	carbohydrate metabolic process
LOC_Os06g09450.4	P	GO:0009058	biosynthetic process
LOC_Os03g57220.2	C	GO:0009536	plastid
LOC_Os03g57220.2	C	GO:0005829	cytosol
LOC_Os03g57220.2	C	GO:0005840	ribosome
LOC_Os03g57220.2	F	GO:0003824	catalytic activity
LOC_Os03g57220.2	C	GO:0005777	peroxisome
LOC_Os03g57220.2	P	GO:0008152	metabolic process
LOC_Os03g57220.2	C	GO:0005634	nucleus
LOC_Os03g57220.2	C	GO:0005576	extracellular region
LOC_Os03g57220.2	C	GO:0016020	membrane
LOC_Os08g03290.1	F	GO:0003824	catalytic activity
LOC_Os08g03290.1	C	GO:0005773	vacuole
LOC_Os08g03290.1	P	GO:0009058	biosynthetic process
LOC_Os08g03290.1	C	GO:0005634	nucleus
LOC_Os08g03290.1	C	GO:0009536	plastid
LOC_Os08g03290.1	C	GO:0005886	plasma membrane
LOC_Os08g03290.1	C	GO:0005739	mitochondrion
LOC_Os08g03290.1	P	GO:0009628	response to abiotic stimulus
LOC_Os08g03290.1	C	GO:0005829	cytosol
LOC_Os08g03290.1	F	GO:0005488	binding
LOC_Os08g03290.1	P	GO:0009791	post-embryonic development
LOC_Os08g03290.1	P	GO:0009056	catabolic process
LOC_Os08g03290.1	P	GO:0006091	generation of precursor metabolites and energy
LOC_Os08g03290.1	P	GO:0005975	carbohydrate metabolic process
LOC_Os08g03290.1	P	GO:0006950	response to stress
LOC_Os08g03290.1	P	GO:0000003	reproduction
LOC_Os08g03290.1	C	GO:0005576	extracellular region
LOC_Os01g13210.2	C	GO:0009536	plastid
LOC_Os01g13210.2	C	GO:0005886	plasma membrane
LOC_Os01g13210.2	F	GO:0005515	protein binding
LOC_Os01g13210.2	P	GO:0006464	cellular protein modification process
LOC_Os01g13210.2	P	GO:0009058	biosynthetic process
LOC_Os01g13210.2	F	GO:0008289	lipid binding
LOC_Os01g13210.2	C	GO:0005773	vacuole
LOC_Os01g13210.2	P	GO:0009607	response to biotic stimulus
LOC_Os01g13210.2	P	GO:0009628	response to abiotic stimulus
LOC_Os01g13210.2	P	GO:0006950	response to stress
LOC_Os04g45070.1	P	GO:0008150	biological_process
LOC_Os04g45070.1	F	GO:0003677	DNA binding
LOC_Os04g45070.1	C	GO:0005575	cellular_component
LOC_Os02g38920.1	F	GO:0003824	catalytic activity
LOC_Os02g38920.1	C	GO:0005773	vacuole
LOC_Os02g38920.1	P	GO:0009058	biosynthetic process
LOC_Os02g38920.1	C	GO:0005634	nucleus
LOC_Os02g38920.1	C	GO:0009536	plastid
LOC_Os02g38920.1	C	GO:0005886	plasma membrane
LOC_Os02g38920.1	C	GO:0005739	mitochondrion
LOC_Os02g38920.1	P	GO:0009628	response to abiotic stimulus
LOC_Os02g38920.1	C	GO:0005829	cytosol
LOC_Os02g38920.1	F	GO:0005488	binding
LOC_Os02g38920.1	P	GO:0009791	post-embryonic development
LOC_Os02g38920.1	P	GO:0009056	catabolic process
LOC_Os02g38920.1	P	GO:0006091	generation of precursor metabolites and energy
LOC_Os02g38920.1	P	GO:0005975	carbohydrate metabolic process
LOC_Os02g38920.1	P	GO:0006950	response to stress
LOC_Os02g38920.1	P	GO:0000003	reproduction
LOC_Os02g38920.1	C	GO:0005576	extracellular region
LOC_Os03g05730.1	F	GO:0016787	hydrolase activity
LOC_Os03g05730.1	P	GO:0006139	nucleobase-containing compound metabolic process
LOC_Os03g05730.1	P	GO:0009056	catabolic process
LOC_Os03g05730.1	C	GO:0005829	cytosol
LOC_Os03g05730.1	C	GO:0005618	cell wall
LOC_Os03g05730.1	F	GO:0005515	protein binding
LOC_Os02g32030.1	C	GO:0009536	plastid
LOC_Os02g32030.1	C	GO:0005886	plasma membrane
LOC_Os02g32030.1	C	GO:0005829	cytosol
LOC_Os02g32030.1	C	GO:0005730	nucleolus
LOC_Os02g32030.1	C	GO:0005773	vacuole
LOC_Os02g32030.1	P	GO:0006412	translation
LOC_Os02g32030.1	P	GO:0009628	response to abiotic stimulus
LOC_Os02g32030.1	P	GO:0006950	response to stress
LOC_Os02g32030.1	F	GO:0008135	translation factor activity, nucleic acid binding
LOC_Os07g36080.3	F	GO:0005488	binding
LOC_Os07g36080.3	P	GO:0006464	cellular protein modification process
LOC_Os07g36080.3	C	GO:0009536	plastid
LOC_Os07g36080.3	C	GO:0009579	thylakoid
LOC_Os07g36080.3	C	GO:0016020	membrane
LOC_Os11g06390.1	P	GO:0016043	cellular component organization
LOC_Os11g06390.1	C	GO:0005618	cell wall
LOC_Os11g06390.1	F	GO:0005198	structural molecule activity
LOC_Os11g06390.1	P	GO:0009791	post-embryonic development
LOC_Os11g06390.1	P	GO:0006950	response to stress
LOC_Os11g06390.1	C	GO:0005856	cytoskeleton
LOC_Os11g06390.1	C	GO:0005886	plasma membrane
LOC_Os11g06390.1	C	GO:0005739	mitochondrion
LOC_Os11g06390.1	C	GO:0005829	cytosol
LOC_Os11g06390.1	F	GO:0005515	protein binding
LOC_Os11g06390.1	C	GO:0005730	nucleolus
LOC_Os11g06390.1	P	GO:0016049	cell growth
LOC_Os11g06390.1	P	GO:0030154	cell differentiation
LOC_Os11g06390.1	P	GO:0009653	anatomical structure morphogenesis
LOC_Os11g06390.1	P	GO:0009628	response to abiotic stimulus
LOC_Os11g06390.1	P	GO:0009719	response to endogenous stimulus
LOC_Os05g01600.1	P	GO:0016043	cellular component organization
LOC_Os05g01600.1	C	GO:0005618	cell wall
LOC_Os05g01600.1	F	GO:0005198	structural molecule activity
LOC_Os05g01600.1	P	GO:0009791	post-embryonic development
LOC_Os05g01600.1	P	GO:0006950	response to stress
LOC_Os05g01600.1	C	GO:0005856	cytoskeleton
LOC_Os05g01600.1	C	GO:0005886	plasma membrane
LOC_Os05g01600.1	C	GO:0005739	mitochondrion
LOC_Os05g01600.1	C	GO:0005829	cytosol
LOC_Os05g01600.1	F	GO:0005515	protein binding
LOC_Os05g01600.1	C	GO:0005730	nucleolus
LOC_Os05g01600.1	P	GO:0016049	cell growth
LOC_Os05g01600.1	P	GO:0030154	cell differentiation
LOC_Os05g01600.1	P	GO:0009653	anatomical structure morphogenesis
LOC_Os05g01600.1	P	GO:0009628	response to abiotic stimulus
LOC_Os05g01600.1	P	GO:0009719	response to endogenous stimulus
LOC_Os11g47760.1	C	GO:0005840	ribosome
LOC_Os11g47760.1	P	GO:0009791	post-embryonic development
LOC_Os11g47760.1	C	GO:0005618	cell wall
LOC_Os11g47760.1	C	GO:0005773	vacuole
LOC_Os11g47760.1	P	GO:0009628	response to abiotic stimulus
LOC_Os11g47760.1	P	GO:0019538	protein metabolic process
LOC_Os11g47760.1	C	GO:0009536	plastid
LOC_Os11g47760.1	C	GO:0005886	plasma membrane
LOC_Os11g47760.1	C	GO:0005829	cytosol
LOC_Os11g47760.1	C	GO:0005730	nucleolus
LOC_Os11g47760.1	F	GO:0005515	protein binding
LOC_Os11g47760.1	P	GO:0009607	response to biotic stimulus
LOC_Os11g47760.1	P	GO:0006950	response to stress
LOC_Os11g47760.1	P	GO:0009987	cellular process
LOC_Os11g47760.1	F	GO:0000166	nucleotide binding
LOC_Os11g47760.1	C	GO:0005576	extracellular region
LOC_Os07g04840.1	F	GO:0003723	RNA binding
LOC_Os07g04840.1	F	GO:0005515	protein binding
LOC_Os07g04840.1	P	GO:0015979	photosynthesis
LOC_Os07g04840.1	P	GO:0006091	generation of precursor metabolites and energy
LOC_Os07g04840.1	P	GO:0009607	response to biotic stimulus
LOC_Os07g04840.1	P	GO:0006950	response to stress
LOC_Os07g04840.1	C	GO:0009536	plastid
LOC_Os07g04840.1	C	GO:0009579	thylakoid
LOC_Os07g04840.1	C	GO:0016020	membrane
LOC_Os07g04840.1	C	GO:0005576	extracellular region
LOC_Os08g27840.1	P	GO:0016043	cellular component organization
LOC_Os08g27840.1	C	GO:0005829	cytosol
LOC_Os08g27840.1	F	GO:0003824	catalytic activity
LOC_Os08g27840.1	F	GO:0005515	protein binding
LOC_Os08g27840.1	P	GO:0006950	response to stress
LOC_Os08g27840.1	P	GO:0007154	cell communication
LOC_Os08g27840.1	P	GO:0009991	response to extracellular stimulus
LOC_Os08g27840.1	C	GO:0005576	extracellular region
LOC_Os08g27840.1	P	GO:0009056	catabolic process
LOC_Os08g27840.1	P	GO:0006091	generation of precursor metabolites and energy
LOC_Os03g50885.1	C	GO:0005886	plasma membrane
LOC_Os03g50885.1	C	GO:0005739	mitochondrion
LOC_Os03g50885.1	F	GO:0005198	structural molecule activity
LOC_Os03g50885.1	P	GO:0009987	cellular process
LOC_Os03g50885.1	P	GO:0016043	cellular component organization
LOC_Os03g50885.1	C	GO:0005856	cytoskeleton
LOC_Os10g36650.1	P	GO:0016043	cellular component organization
LOC_Os10g36650.1	C	GO:0005618	cell wall
LOC_Os10g36650.1	F	GO:0005198	structural molecule activity
LOC_Os10g36650.1	P	GO:0009791	post-embryonic development
LOC_Os10g36650.1	P	GO:0006950	response to stress
LOC_Os10g36650.1	C	GO:0005856	cytoskeleton
LOC_Os10g36650.1	C	GO:0005886	plasma membrane
LOC_Os10g36650.1	C	GO:0005739	mitochondrion
LOC_Os10g36650.1	C	GO:0005829	cytosol
LOC_Os10g36650.1	F	GO:0005515	protein binding
LOC_Os10g36650.1	C	GO:0005730	nucleolus
LOC_Os10g36650.1	P	GO:0016049	cell growth
LOC_Os10g36650.1	P	GO:0030154	cell differentiation
LOC_Os10g36650.1	P	GO:0009653	anatomical structure morphogenesis
LOC_Os10g36650.1	P	GO:0009628	response to abiotic stimulus
LOC_Os10g36650.1	P	GO:0009719	response to endogenous stimulus
LOC_Os02g41630.2	P	GO:0009058	biosynthetic process
LOC_Os02g41630.2	C	GO:0005737	cytoplasm
LOC_Os02g41630.2	P	GO:0009628	response to abiotic stimulus
LOC_Os02g41630.2	P	GO:0007275	multicellular organismal development
LOC_Os02g41630.2	F	GO:0003824	catalytic activity
LOC_Os02g41630.2	P	GO:0006950	response to stress
LOC_Os02g41630.2	P	GO:0019748	secondary metabolic process
LOC_Os02g41630.2	P	GO:0009987	cellular process
LOC_Os02g41630.2	P	GO:0009056	catabolic process
LOC_Os01g05490.1	C	GO:0005618	cell wall
LOC_Os01g05490.1	P	GO:0006464	cellular protein modification process
LOC_Os01g05490.1	C	GO:0005773	vacuole
LOC_Os01g05490.1	F	GO:0003824	catalytic activity
LOC_Os01g05490.1	C	GO:0009536	plastid
LOC_Os01g05490.1	C	GO:0005886	plasma membrane
LOC_Os01g05490.1	C	GO:0005739	mitochondrion
LOC_Os01g05490.1	P	GO:0009628	response to abiotic stimulus
LOC_Os01g05490.1	P	GO:0006950	response to stress
LOC_Os01g05490.1	C	GO:0005829	cytosol
LOC_Os01g05490.1	F	GO:0005488	binding
LOC_Os01g05490.1	P	GO:0009056	catabolic process
LOC_Os01g05490.1	P	GO:0006091	generation of precursor metabolites and energy
LOC_Os01g05490.1	P	GO:0005975	carbohydrate metabolic process
LOC_Os01g05490.1	C	GO:0005576	extracellular region
LOC_Os03g16860.2	P	GO:0009607	response to biotic stimulus
LOC_Os03g16860.2	C	GO:0005618	cell wall
LOC_Os03g16860.2	C	GO:0005773	vacuole
LOC_Os03g16860.2	P	GO:0006950	response to stress
LOC_Os03g16860.2	P	GO:0009628	response to abiotic stimulus
LOC_Os03g16860.2	C	GO:0005886	plasma membrane
LOC_Os03g16860.2	C	GO:0005739	mitochondrion
LOC_Os03g16860.2	C	GO:0005829	cytosol
LOC_Os03g16860.2	P	GO:0006464	cellular protein modification process
LOC_Os03g16860.2	F	GO:0005515	protein binding
LOC_Os03g16860.2	F	GO:0000166	nucleotide binding
LOC_Os09g31019.1	F	GO:0005198	structural molecule activity
LOC_Os09g31019.1	P	GO:0006412	translation
LOC_Os09g31019.1	C	GO:0005829	cytosol
LOC_Os09g31019.1	C	GO:0005840	ribosome
LOC_Os09g31019.1	C	GO:0005730	nucleolus
LOC_Os09g31031.2	F	GO:0005198	structural molecule activity
LOC_Os09g31031.2	P	GO:0006412	translation
LOC_Os09g31031.2	C	GO:0005829	cytosol
LOC_Os09g31031.2	C	GO:0005840	ribosome
LOC_Os09g31031.2	C	GO:0005730	nucleolus
LOC_Os08g02120.1	P	GO:0006091	generation of precursor metabolites and energy
LOC_Os08g02120.1	F	GO:0016301	kinase activity
LOC_Os08g02120.1	P	GO:0005975	carbohydrate metabolic process
LOC_Os08g02120.1	P	GO:0009058	biosynthetic process
LOC_Os08g02120.1	C	GO:0005575	cellular_component
LOC_Os07g05820.1	C	GO:0009536	plastid
LOC_Os07g05820.1	C	GO:0005829	cytosol
LOC_Os07g05820.1	C	GO:0005840	ribosome
LOC_Os07g05820.1	F	GO:0003824	catalytic activity
LOC_Os07g05820.1	C	GO:0005777	peroxisome
LOC_Os07g05820.1	P	GO:0008152	metabolic process
LOC_Os07g05820.1	C	GO:0005634	nucleus
LOC_Os07g05820.1	C	GO:0005576	extracellular region
LOC_Os07g05820.1	C	GO:0016020	membrane
LOC_Os06g40640.1	C	GO:0009536	plastid
LOC_Os06g40640.1	P	GO:0009056	catabolic process
LOC_Os06g40640.1	P	GO:0006091	generation of precursor metabolites and energy
LOC_Os06g40640.1	P	GO:0005975	carbohydrate metabolic process
LOC_Os06g40640.1	F	GO:0003824	catalytic activity
LOC_Os06g40640.1	F	GO:0005515	protein binding
LOC_Os12g06660.1	P	GO:0016043	cellular component organization
LOC_Os12g06660.1	C	GO:0005618	cell wall
LOC_Os12g06660.1	F	GO:0005198	structural molecule activity
LOC_Os12g06660.1	P	GO:0009791	post-embryonic development
LOC_Os12g06660.1	P	GO:0006950	response to stress
LOC_Os12g06660.1	C	GO:0005856	cytoskeleton
LOC_Os12g06660.1	C	GO:0005886	plasma membrane
LOC_Os12g06660.1	C	GO:0005739	mitochondrion
LOC_Os12g06660.1	C	GO:0005829	cytosol
LOC_Os12g06660.1	F	GO:0005515	protein binding
LOC_Os12g06660.1	C	GO:0005730	nucleolus
LOC_Os12g06660.1	P	GO:0016049	cell growth
LOC_Os12g06660.1	P	GO:0030154	cell differentiation
LOC_Os12g06660.1	P	GO:0009653	anatomical structure morphogenesis
LOC_Os12g06660.1	P	GO:0009628	response to abiotic stimulus
LOC_Os12g06660.1	P	GO:0009719	response to endogenous stimulus
LOC_Os01g67860.1	C	GO:0005886	plasma membrane
LOC_Os01g67860.1	C	GO:0005739	mitochondrion
LOC_Os01g67860.1	P	GO:0009628	response to abiotic stimulus
LOC_Os01g67860.1	P	GO:0006950	response to stress
LOC_Os01g67860.1	F	GO:0005488	binding
LOC_Os01g67860.1	C	GO:0005829	cytosol
LOC_Os01g67860.1	P	GO:0009056	catabolic process
LOC_Os01g67860.1	P	GO:0006139	nucleobase-containing compound metabolic process
LOC_Os01g67860.1	P	GO:0005975	carbohydrate metabolic process
LOC_Os02g18410.1	C	GO:0009536	plastid
LOC_Os02g18410.1	C	GO:0005886	plasma membrane
LOC_Os02g18410.1	F	GO:0005515	protein binding
LOC_Os02g18410.1	P	GO:0006464	cellular protein modification process
LOC_Os02g18410.1	P	GO:0009058	biosynthetic process
LOC_Os02g18410.1	F	GO:0008289	lipid binding
LOC_Os02g18410.1	C	GO:0005773	vacuole
LOC_Os02g18410.1	P	GO:0009607	response to biotic stimulus
LOC_Os02g18410.1	P	GO:0009628	response to abiotic stimulus
LOC_Os02g18410.1	P	GO:0006950	response to stress
LOC_Os06g01500.1	C	GO:0005886	plasma membrane
LOC_Os06g01500.1	F	GO:0005515	protein binding
LOC_Os06g01500.1	P	GO:0009628	response to abiotic stimulus
LOC_Os06g01500.1	P	GO:0006950	response to stress
LOC_Os06g01500.1	C	GO:0005783	endoplasmic reticulum
LOC_Os06g01500.1	P	GO:0009987	cellular process
LOC_Os06g01500.1	P	GO:0019538	protein metabolic process
LOC_Os02g01150.2	C	GO:0009536	plastid
LOC_Os02g01150.2	C	GO:0005777	peroxisome
LOC_Os02g01150.2	F	GO:0003824	catalytic activity
LOC_Os02g01150.2	P	GO:0009987	cellular process
LOC_Os02g01150.2	P	GO:0009058	biosynthetic process
LOC_Os02g01150.2	F	GO:0003723	RNA binding
LOC_Os02g01150.2	C	GO:0005576	extracellular region
LOC_Os01g22010.3	P	GO:0006139	nucleobase-containing compound metabolic process
LOC_Os01g22010.3	C	GO:0005886	plasma membrane
LOC_Os01g22010.3	F	GO:0016740	transferase activity
LOC_Os01g22010.3	P	GO:0009628	response to abiotic stimulus
LOC_Os01g22010.3	P	GO:0006950	response to stress
LOC_Os01g22010.3	C	GO:0005829	cytosol
LOC_Os01g22010.3	C	GO:0005618	cell wall
LOC_Os01g22010.3	P	GO:0009058	biosynthetic process
LOC_Os05g33380.1	C	GO:0005886	plasma membrane
LOC_Os05g33380.1	C	GO:0005739	mitochondrion
LOC_Os05g33380.1	P	GO:0009628	response to abiotic stimulus
LOC_Os05g33380.1	P	GO:0006950	response to stress
LOC_Os05g33380.1	F	GO:0005488	binding
LOC_Os05g33380.1	C	GO:0005829	cytosol
LOC_Os05g33380.1	P	GO:0009056	catabolic process
LOC_Os05g33380.1	P	GO:0006139	nucleobase-containing compound metabolic process
LOC_Os05g33380.1	P	GO:0005975	carbohydrate metabolic process
LOC_Os01g64630.1	P	GO:0016043	cellular component organization
LOC_Os01g64630.1	C	GO:0005618	cell wall
LOC_Os01g64630.1	F	GO:0005198	structural molecule activity
LOC_Os01g64630.1	P	GO:0009791	post-embryonic development
LOC_Os01g64630.1	P	GO:0006950	response to stress
LOC_Os01g64630.1	C	GO:0005856	cytoskeleton
LOC_Os01g64630.1	C	GO:0005886	plasma membrane
LOC_Os01g64630.1	C	GO:0005739	mitochondrion
LOC_Os01g64630.1	C	GO:0005829	cytosol
LOC_Os01g64630.1	F	GO:0005515	protein binding
LOC_Os01g64630.1	C	GO:0005730	nucleolus
LOC_Os01g64630.1	P	GO:0016049	cell growth
LOC_Os01g64630.1	P	GO:0030154	cell differentiation
LOC_Os01g64630.1	P	GO:0009653	anatomical structure morphogenesis
LOC_Os01g64630.1	P	GO:0009628	response to abiotic stimulus
LOC_Os01g64630.1	P	GO:0009719	response to endogenous stimulus
LOC_Os01g62290.1	P	GO:0009607	response to biotic stimulus
LOC_Os01g62290.1	C	GO:0005618	cell wall
LOC_Os01g62290.1	C	GO:0005773	vacuole
LOC_Os01g62290.1	P	GO:0006950	response to stress
LOC_Os01g62290.1	P	GO:0009628	response to abiotic stimulus
LOC_Os01g62290.1	C	GO:0005886	plasma membrane
LOC_Os01g62290.1	C	GO:0005739	mitochondrion
LOC_Os01g62290.1	C	GO:0005829	cytosol
LOC_Os01g62290.1	P	GO:0006464	cellular protein modification process
LOC_Os01g62290.1	F	GO:0005515	protein binding
LOC_Os01g62290.1	F	GO:0000166	nucleotide binding
LOC_Os03g60620.1	C	GO:0005840	ribosome
LOC_Os03g60620.1	P	GO:0009791	post-embryonic development
LOC_Os03g60620.1	C	GO:0005618	cell wall
LOC_Os03g60620.1	C	GO:0005773	vacuole
LOC_Os03g60620.1	P	GO:0009628	response to abiotic stimulus
LOC_Os03g60620.1	P	GO:0019538	protein metabolic process
LOC_Os03g60620.1	C	GO:0009536	plastid
LOC_Os03g60620.1	C	GO:0005886	plasma membrane
LOC_Os03g60620.1	C	GO:0005829	cytosol
LOC_Os03g60620.1	C	GO:0005730	nucleolus
LOC_Os03g60620.1	F	GO:0005515	protein binding
LOC_Os03g60620.1	P	GO:0009607	response to biotic stimulus
LOC_Os03g60620.1	P	GO:0006950	response to stress
LOC_Os03g60620.1	P	GO:0009987	cellular process
LOC_Os03g60620.1	F	GO:0000166	nucleotide binding
LOC_Os03g60620.1	C	GO:0005576	extracellular region
LOC_Os05g04510.1	P	GO:0006139	nucleobase-containing compound metabolic process
LOC_Os05g04510.1	C	GO:0005886	plasma membrane
LOC_Os05g04510.1	F	GO:0016740	transferase activity
LOC_Os05g04510.1	P	GO:0009628	response to abiotic stimulus
LOC_Os05g04510.1	P	GO:0006950	response to stress
LOC_Os05g04510.1	C	GO:0005829	cytosol
LOC_Os05g04510.1	C	GO:0005618	cell wall
LOC_Os05g04510.1	P	GO:0009058	biosynthetic process
LOC_Os02g02890.1	C	GO:0005886	plasma membrane
LOC_Os02g02890.1	P	GO:0006464	cellular protein modification process
LOC_Os02g02890.1	C	GO:0005829	cytosol
LOC_Os02g02890.1	F	GO:0003824	catalytic activity
LOC_Os03g50290.2	C	GO:0009536	plastid
LOC_Os03g50290.2	C	GO:0005886	plasma membrane
LOC_Os03g50290.2	F	GO:0005515	protein binding
LOC_Os03g50290.2	C	GO:0005635	nuclear envelope
LOC_Os09g38030.2	C	GO:0005886	plasma membrane
LOC_Os09g38030.2	P	GO:0009628	response to abiotic stimulus
LOC_Os09g38030.2	P	GO:0006950	response to stress
LOC_Os09g38030.2	C	GO:0005829	cytosol
LOC_Os09g38030.2	F	GO:0016740	transferase activity
LOC_Os09g38030.2	P	GO:0008152	metabolic process
LOC_Os09g38030.2	P	GO:0007275	multicellular organismal development
LOC_Os09g38030.2	P	GO:0009987	cellular process
LOC_Os10g28200.1	F	GO:0000166	nucleotide binding
LOC_Os10g28200.1	C	GO:0005829	cytosol
LOC_Os10g28200.1	P	GO:0006139	nucleobase-containing compound metabolic process
LOC_Os10g28200.1	P	GO:0009058	biosynthetic process
LOC_Os10g28200.1	F	GO:0003824	catalytic activity
LOC_Os11g01380.1	C	GO:0005886	plasma membrane
LOC_Os11g01380.1	F	GO:0005198	structural molecule activity
LOC_Os11g01380.1	C	GO:0005773	vacuole
LOC_Os11g01380.1	P	GO:0009987	cellular process
LOC_Os11g01380.1	P	GO:0006810	transport
LOC_Os11g01380.1	F	GO:0005488	binding
LOC_Os05g35460.1	C	GO:0009536	plastid
LOC_Os05g35460.1	F	GO:0005215	transporter activity
LOC_Os05g35460.1	P	GO:0006810	transport
LOC_Os02g14770.4	C	GO:0009536	plastid
LOC_Os02g14770.4	C	GO:0005886	plasma membrane
LOC_Os02g14770.4	C	GO:0005829	cytosol
LOC_Os02g14770.4	F	GO:0003824	catalytic activity
LOC_Os02g14770.4	C	GO:0005576	extracellular region
LOC_Os02g14770.4	P	GO:0009056	catabolic process
LOC_Os02g14770.4	P	GO:0006091	generation of precursor metabolites and energy
LOC_Os01g48280.1	P	GO:0007275	multicellular organismal development
LOC_Os01g48280.1	P	GO:0030154	cell differentiation
LOC_Os01g48280.1	P	GO:0009653	anatomical structure morphogenesis
LOC_Os01g48280.1	C	GO:0005886	plasma membrane
LOC_Os01g48280.1	C	GO:0005829	cytosol
LOC_Os01g48280.1	P	GO:0009056	catabolic process
LOC_Os01g48280.1	F	GO:0005515	protein binding
LOC_Os01g48280.1	F	GO:0003824	catalytic activity
LOC_Os01g48280.1	P	GO:0006464	cellular protein modification process
LOC_Os01g46610.1	C	GO:0005886	plasma membrane
LOC_Os01g46610.1	P	GO:0009628	response to abiotic stimulus
LOC_Os01g46610.1	C	GO:0005829	cytosol
LOC_Os01g46610.1	F	GO:0005515	protein binding
LOC_Os01g46610.1	F	GO:0003824	catalytic activity
LOC_Os01g46610.1	P	GO:0009607	response to biotic stimulus
LOC_Os01g46610.1	P	GO:0006950	response to stress
LOC_Os01g46610.1	P	GO:0006139	nucleobase-containing compound metabolic process
LOC_Os01g46610.1	C	GO:0005576	extracellular region
LOC_Os03g17690.1	C	GO:0009536	plastid
LOC_Os03g17690.1	P	GO:0009790	embryo development
LOC_Os03g17690.1	P	GO:0009791	post-embryonic development
LOC_Os03g17690.1	P	GO:0000003	reproduction
LOC_Os03g17690.1	C	GO:0005886	plasma membrane
LOC_Os03g17690.1	P	GO:0009987	cellular process
LOC_Os03g17690.1	P	GO:0009056	catabolic process
LOC_Os03g17690.1	C	GO:0005829	cytosol
LOC_Os03g17690.1	F	GO:0005515	protein binding
LOC_Os03g17690.1	C	GO:0005618	cell wall
LOC_Os03g17690.1	P	GO:0009628	response to abiotic stimulus
LOC_Os03g17690.1	P	GO:0006950	response to stress
LOC_Os03g17690.1	F	GO:0003824	catalytic activity
LOC_Os09g14670.1	P	GO:0016043	cellular component organization
LOC_Os09g14670.1	C	GO:0005829	cytosol
LOC_Os09g14670.1	F	GO:0003824	catalytic activity
LOC_Os09g14670.1	F	GO:0005515	protein binding
LOC_Os09g14670.1	P	GO:0006950	response to stress
LOC_Os09g14670.1	P	GO:0007154	cell communication
LOC_Os09g14670.1	P	GO:0009991	response to extracellular stimulus
LOC_Os09g14670.1	C	GO:0005576	extracellular region
LOC_Os09g14670.1	P	GO:0009056	catabolic process
LOC_Os09g14670.1	P	GO:0006091	generation of precursor metabolites and energy
LOC_Os02g36974.4	C	GO:0009536	plastid
LOC_Os02g36974.4	C	GO:0005886	plasma membrane
LOC_Os02g36974.4	F	GO:0005515	protein binding
LOC_Os02g36974.4	C	GO:0005635	nuclear envelope
LOC_Os08g33370.2	C	GO:0009536	plastid
LOC_Os08g33370.2	C	GO:0005886	plasma membrane
LOC_Os08g33370.2	F	GO:0005515	protein binding
LOC_Os08g33370.2	C	GO:0005635	nuclear envelope
LOC_Os07g08840.1	P	GO:0019725	cellular homeostasis
LOC_Os07g08840.1	P	GO:0008152	metabolic process
LOC_Os07g08840.1	C	GO:0005829	cytosol
LOC_Os07g08840.1	F	GO:0003824	catalytic activity
LOC_Os03g40270.1	C	GO:0005840	ribosome
LOC_Os03g40270.1	P	GO:0009628	response to abiotic stimulus
LOC_Os03g40270.1	P	GO:0006950	response to stress
LOC_Os03g40270.1	C	GO:0005829	cytosol
LOC_Os03g40270.1	C	GO:0005794	Golgi apparatus
LOC_Os03g40270.1	F	GO:0005515	protein binding
LOC_Os03g40270.1	C	GO:0005618	cell wall
LOC_Os03g40270.1	F	GO:0003824	catalytic activity
LOC_Os03g40270.1	P	GO:0007275	multicellular organismal development
LOC_Os03g40270.1	P	GO:0005975	carbohydrate metabolic process
LOC_Os03g40270.1	P	GO:0006139	nucleobase-containing compound metabolic process
LOC_Os03g40270.1	C	GO:0016020	membrane
LOC_Os07g49400.1	C	GO:0009536	plastid
LOC_Os07g49400.1	P	GO:0009790	embryo development
LOC_Os07g49400.1	P	GO:0009791	post-embryonic development
LOC_Os07g49400.1	P	GO:0000003	reproduction
LOC_Os07g49400.1	C	GO:0005886	plasma membrane
LOC_Os07g49400.1	P	GO:0009987	cellular process
LOC_Os07g49400.1	P	GO:0009056	catabolic process
LOC_Os07g49400.1	C	GO:0005829	cytosol
LOC_Os07g49400.1	F	GO:0005515	protein binding
LOC_Os07g49400.1	C	GO:0005618	cell wall
LOC_Os07g49400.1	P	GO:0009628	response to abiotic stimulus
LOC_Os07g49400.1	P	GO:0006950	response to stress
LOC_Os07g49400.1	F	GO:0003824	catalytic activity
LOC_Os03g55070.1	C	GO:0005829	cytosol
LOC_Os03g55070.1	C	GO:0005618	cell wall
LOC_Os03g55070.1	F	GO:0000166	nucleotide binding
LOC_Os03g55070.1	P	GO:0008152	metabolic process
LOC_Os03g55070.1	C	GO:0005634	nucleus
LOC_Os03g55070.1	F	GO:0003824	catalytic activity
LOC_Os01g64660.2	P	GO:0015979	photosynthesis
LOC_Os01g64660.2	P	GO:0009056	catabolic process
LOC_Os01g64660.2	F	GO:0016787	hydrolase activity
LOC_Os01g64660.2	C	GO:0005829	cytosol
LOC_Os01g64660.2	F	GO:0005515	protein binding
LOC_Os01g64660.2	P	GO:0009719	response to endogenous stimulus
LOC_Os01g64660.2	C	GO:0005634	nucleus
LOC_Os01g64660.2	P	GO:0005975	carbohydrate metabolic process
LOC_Os01g64660.2	P	GO:0009058	biosynthetic process
LOC_Os05g41210.1	C	GO:0005886	plasma membrane
LOC_Os05g41210.1	F	GO:0004871	signal transducer activity
LOC_Os05g41210.1	F	GO:0005515	protein binding
LOC_Os05g41210.1	P	GO:0007165	signal transduction
LOC_Os11g01510.3	C	GO:0005886	plasma membrane
LOC_Os11g01510.3	P	GO:0009607	response to biotic stimulus
LOC_Os11g01510.3	C	GO:0005829	cytosol
LOC_Os11g01510.3	P	GO:0009056	catabolic process
LOC_Os11g01510.3	F	GO:0003824	catalytic activity
LOC_Os11g01510.3	P	GO:0006464	cellular protein modification process
LOC_Os06g45120.2	P	GO:0006139	nucleobase-containing compound metabolic process
LOC_Os06g45120.2	P	GO:0009056	catabolic process
LOC_Os06g45120.2	C	GO:0005618	cell wall
LOC_Os06g45120.2	C	GO:0005773	vacuole
LOC_Os06g45120.2	P	GO:0016043	cellular component organization
LOC_Os06g45120.2	F	GO:0005515	protein binding
LOC_Os06g45120.2	F	GO:0005215	transporter activity
LOC_Os06g45120.2	F	GO:0016787	hydrolase activity
LOC_Os06g45120.2	C	GO:0005886	plasma membrane
LOC_Os06g45120.2	C	GO:0009536	plastid
LOC_Os06g45120.2	P	GO:0009628	response to abiotic stimulus
LOC_Os06g45120.2	P	GO:0006950	response to stress
LOC_Os06g45120.2	P	GO:0006810	transport
LOC_Os06g45120.2	F	GO:0000166	nucleotide binding
LOC_Os06g45120.2	P	GO:0007275	multicellular organismal development
LOC_Os12g25690.1	C	GO:0005829	cytosol
LOC_Os12g25690.1	C	GO:0005618	cell wall
LOC_Os12g25690.1	F	GO:0000166	nucleotide binding
LOC_Os12g25690.1	P	GO:0008152	metabolic process
LOC_Os12g25690.1	C	GO:0005634	nucleus
LOC_Os12g25690.1	F	GO:0003824	catalytic activity
LOC_Os12g25700.2	C	GO:0005829	cytosol
LOC_Os12g25700.2	C	GO:0005618	cell wall
LOC_Os12g25700.2	F	GO:0000166	nucleotide binding
LOC_Os12g25700.2	P	GO:0008152	metabolic process
LOC_Os12g25700.2	C	GO:0005634	nucleus
LOC_Os12g25700.2	F	GO:0003824	catalytic activity
LOC_Os03g21040.2	P	GO:0008150	biological_process
LOC_Os03g21040.2	C	GO:0005575	cellular_component
LOC_Os03g21040.2	F	GO:0003674	molecular_function
LOC_Os08g09250.1	C	GO:0005886	plasma membrane
LOC_Os08g09250.1	C	GO:0009536	plastid
LOC_Os08g09250.1	P	GO:0005975	carbohydrate metabolic process
LOC_Os08g09250.1	C	GO:0005829	cytosol
LOC_Os08g09250.1	F	GO:0005488	binding
LOC_Os08g09250.1	C	GO:0005773	vacuole
LOC_Os08g09250.1	C	GO:0005777	peroxisome
LOC_Os08g09250.1	F	GO:0003824	catalytic activity
LOC_Os12g43600.1	C	GO:0005634	nucleus
LOC_Os12g43600.1	C	GO:0009536	plastid
LOC_Os12g43600.1	C	GO:0005829	cytosol
LOC_Os12g43600.1	P	GO:0009791	post-embryonic development
LOC_Os12g43600.1	P	GO:0000003	reproduction
LOC_Os12g43600.1	F	GO:0003677	DNA binding
LOC_Os12g43600.1	P	GO:0006259	DNA metabolic process
LOC_Os12g43600.1	C	GO:0005777	peroxisome
LOC_Os12g43600.1	P	GO:0009628	response to abiotic stimulus
LOC_Os12g43600.1	P	GO:0006950	response to stress
LOC_Os12g43600.1	F	GO:0003723	RNA binding
LOC_Os12g43600.1	P	GO:0006810	transport
LOC_Os03g16980.2	C	GO:0005886	plasma membrane
LOC_Os03g16980.2	F	GO:0005488	binding
LOC_Os03g16980.2	F	GO:0003824	catalytic activity
LOC_Os03g16980.2	P	GO:0006139	nucleobase-containing compound metabolic process
LOC_Os12g42980.1	C	GO:0009536	plastid
LOC_Os12g42980.1	C	GO:0005886	plasma membrane
LOC_Os12g42980.1	C	GO:0005829	cytosol
LOC_Os12g42980.1	P	GO:0009987	cellular process
LOC_Os12g42980.1	P	GO:0009058	biosynthetic process
LOC_Os12g42980.1	F	GO:0005515	protein binding
LOC_Os12g42980.1	C	GO:0005773	vacuole
LOC_Os12g42980.1	C	GO:0005777	peroxisome
LOC_Os12g42980.1	F	GO:0003824	catalytic activity
LOC_Os12g42980.1	C	GO:0005634	nucleus
LOC_Os12g42980.1	C	GO:0005576	extracellular region
LOC_Os05g49860.1	P	GO:0006259	DNA metabolic process
LOC_Os05g49860.1	P	GO:0016043	cellular component organization
LOC_Os05g49860.1	C	GO:0005575	cellular_component
LOC_Os05g49860.1	F	GO:0003677	DNA binding
LOC_Os01g60190.2	C	GO:0005829	cytosol
LOC_Os01g60190.2	F	GO:0005488	binding
LOC_Os01g60190.2	F	GO:0003824	catalytic activity
LOC_Os01g60190.2	P	GO:0008152	metabolic process
LOC_Os01g60190.2	C	GO:0005576	extracellular region
LOC_Os06g37180.1	C	GO:0009536	plastid
LOC_Os06g37180.1	P	GO:0009056	catabolic process
LOC_Os06g37180.1	F	GO:0005215	transporter activity
LOC_Os06g37180.1	F	GO:0016787	hydrolase activity
LOC_Os06g37180.1	P	GO:0009058	biosynthetic process
LOC_Os06g37180.1	C	GO:0005773	vacuole
LOC_Os06g37180.1	P	GO:0006810	transport
LOC_Os06g37180.1	F	GO:0000166	nucleotide binding
LOC_Os06g37180.1	C	GO:0016020	membrane
LOC_Os06g37180.1	P	GO:0006139	nucleobase-containing compound metabolic process
LOC_Os01g07760.1	F	GO:0008289	lipid binding
LOC_Os01g07760.1	P	GO:0009791	post-embryonic development
LOC_Os01g07760.1	C	GO:0005634	nucleus
LOC_Os01g07760.1	P	GO:0007165	signal transduction
LOC_Os01g07760.1	P	GO:0009719	response to endogenous stimulus
LOC_Os01g07760.1	C	GO:0009536	plastid
LOC_Os01g07760.1	C	GO:0005886	plasma membrane
LOC_Os01g07760.1	C	GO:0005739	mitochondrion
LOC_Os01g07760.1	C	GO:0005829	cytosol
LOC_Os01g07760.1	P	GO:0006629	lipid metabolic process
LOC_Os01g07760.1	F	GO:0005515	protein binding
LOC_Os01g07760.1	F	GO:0016787	hydrolase activity
LOC_Os01g65880.1	F	GO:0005215	transporter activity
LOC_Os01g65880.1	C	GO:0005886	plasma membrane
LOC_Os01g65880.1	P	GO:0009987	cellular process
LOC_Os01g65880.1	P	GO:0006810	transport
LOC_Os08g34210.1	F	GO:0005515	protein binding
LOC_Os08g34210.1	P	GO:0008152	metabolic process
LOC_Os08g34210.1	F	GO:0003824	catalytic activity
LOC_Os02g02410.1	C	GO:0005886	plasma membrane
LOC_Os02g02410.1	P	GO:0007275	multicellular organismal development
LOC_Os02g02410.1	P	GO:0030154	cell differentiation
LOC_Os02g02410.1	P	GO:0016043	cellular component organization
LOC_Os02g02410.1	C	GO:0005730	nucleolus
LOC_Os02g02410.1	C	GO:0005618	cell wall
LOC_Os02g02410.1	C	GO:0005773	vacuole
LOC_Os02g02410.1	P	GO:0009628	response to abiotic stimulus
LOC_Os02g02410.1	P	GO:0006950	response to stress
LOC_Os02g02410.1	F	GO:0000166	nucleotide binding
LOC_Os02g02410.1	C	GO:0005783	endoplasmic reticulum
LOC_Os02g02410.1	P	GO:0019538	protein metabolic process
LOC_Os12g07010.1	P	GO:0009790	embryo development
LOC_Os12g07010.1	P	GO:0009791	post-embryonic development
LOC_Os12g07010.1	P	GO:0000003	reproduction
LOC_Os12g07010.1	C	GO:0005886	plasma membrane
LOC_Os12g07010.1	F	GO:0005198	structural molecule activity
LOC_Os12g07010.1	P	GO:0006412	translation
LOC_Os12g07010.1	C	GO:0005730	nucleolus
LOC_Os12g07010.1	C	GO:0005618	cell wall
LOC_Os12g07010.1	C	GO:0005773	vacuole
LOC_Os12g07010.1	C	GO:0005829	cytosol
LOC_Os12g07010.1	C	GO:0005840	ribosome
LOC_Os07g26690.1	P	GO:0009987	cellular process
LOC_Os07g26690.1	C	GO:0016020	membrane
LOC_Os07g26690.1	F	GO:0005215	transporter activity
LOC_Os07g26690.1	P	GO:0006810	transport
LOC_Os01g01060.1	C	GO:0009536	plastid
LOC_Os01g01060.1	C	GO:0005886	plasma membrane
LOC_Os01g01060.1	F	GO:0005198	structural molecule activity
LOC_Os01g01060.1	P	GO:0006412	translation
LOC_Os01g01060.1	C	GO:0005829	cytosol
LOC_Os01g01060.1	C	GO:0005618	cell wall
LOC_Os01g01060.1	C	GO:0005773	vacuole
LOC_Os01g01060.1	C	GO:0005840	ribosome
LOC_Os03g53190.2	P	GO:0009607	response to biotic stimulus
LOC_Os03g53190.2	P	GO:0006950	response to stress
LOC_Os03g53190.2	P	GO:0009628	response to abiotic stimulus
LOC_Os03g53190.2	P	GO:0009605	response to external stimulus
LOC_Os03g53190.2	F	GO:0005515	protein binding
LOC_Os03g53190.2	C	GO:0005634	nucleus
LOC_Os03g53190.2	F	GO:0003677	DNA binding
LOC_Os03g53190.2	P	GO:0009908	flower development
LOC_Os08g38300.1	P	GO:0006259	DNA metabolic process
LOC_Os08g38300.1	P	GO:0016043	cellular component organization
LOC_Os08g38300.1	C	GO:0005730	nucleolus
LOC_Os08g38300.1	F	GO:0005515	protein binding
LOC_Os08g38300.1	F	GO:0003677	DNA binding
LOC_Os10g28230.1	P	GO:0009607	response to biotic stimulus
LOC_Os10g28230.1	P	GO:0006950	response to stress
LOC_Os10g28230.1	P	GO:0009628	response to abiotic stimulus
LOC_Os10g28230.1	P	GO:0009605	response to external stimulus
LOC_Os10g28230.1	F	GO:0005515	protein binding
LOC_Os10g28230.1	C	GO:0005634	nucleus
LOC_Os10g28230.1	F	GO:0003677	DNA binding
LOC_Os10g28230.1	P	GO:0009908	flower development
LOC_Os06g15360.1	P	GO:0006259	DNA metabolic process
LOC_Os06g15360.1	P	GO:0006950	response to stress
LOC_Os06g15360.1	P	GO:0009056	catabolic process
LOC_Os06g15360.1	P	GO:0019538	protein metabolic process
LOC_Os06g15360.1	C	GO:0005634	nucleus
LOC_Os06g15360.1	F	GO:0005515	protein binding
LOC_Os11g34450.1	C	GO:0009536	plastid
LOC_Os11g34450.1	C	GO:0005886	plasma membrane
LOC_Os11g34450.1	F	GO:0005515	protein binding
LOC_Os11g34450.1	C	GO:0005635	nuclear envelope
LOC_Os09g29200.1	C	GO:0005737	cytoplasm
LOC_Os09g29200.1	P	GO:0019748	secondary metabolic process
LOC_Os09g29200.1	P	GO:0009987	cellular process
LOC_Os09g29200.1	P	GO:0009056	catabolic process
LOC_Os09g29200.1	F	GO:0016740	transferase activity
LOC_Os02g01560.1	F	GO:0005198	structural molecule activity
LOC_Os02g01560.1	C	GO:0005840	ribosome
LOC_Os02g01560.1	P	GO:0006412	translation
LOC_Os02g01560.1	C	GO:0005829	cytosol
LOC_Os02g01560.1	C	GO:0005730	nucleolus
LOC_Os02g01560.1	C	GO:0016020	membrane
LOC_Os11g37890.1	F	GO:0000166	nucleotide binding
LOC_Os11g37890.1	C	GO:0005829	cytosol
LOC_Os11g37890.1	P	GO:0006139	nucleobase-containing compound metabolic process
LOC_Os11g37890.1	P	GO:0009058	biosynthetic process
LOC_Os11g37890.1	F	GO:0003824	catalytic activity
LOC_Os12g26290.5	F	GO:0003824	catalytic activity
LOC_Os12g26290.5	P	GO:0009607	response to biotic stimulus
LOC_Os12g26290.5	C	GO:0005623	cell
LOC_Os12g26290.5	P	GO:0006950	response to stress
LOC_Os12g26290.5	P	GO:0008219	cell death
LOC_Os12g26290.5	P	GO:0006629	lipid metabolic process
LOC_Os12g26290.5	P	GO:0009056	catabolic process
LOC_Os01g49290.1	P	GO:0009987	cellular process
LOC_Os01g49290.1	P	GO:0009719	response to endogenous stimulus
LOC_Os01g49290.1	P	GO:0009791	post-embryonic development
LOC_Os01g49290.1	C	GO:0005886	plasma membrane
LOC_Os01g49290.1	F	GO:0000166	nucleotide binding
LOC_Os01g49290.1	C	GO:0005730	nucleolus
LOC_Os03g38000.2	C	GO:0005829	cytosol
LOC_Os03g38000.2	C	GO:0005840	ribosome
LOC_Os03g38000.2	F	GO:0005198	structural molecule activity
LOC_Os03g38000.2	P	GO:0009628	response to abiotic stimulus
LOC_Os03g38000.2	P	GO:0006950	response to stress
LOC_Os03g38000.2	P	GO:0006412	translation
LOC_Os03g38000.2	F	GO:0003723	RNA binding
LOC_Os03g38000.2	C	GO:0016020	membrane
LOC_Os08g38900.1	P	GO:0019748	secondary metabolic process
LOC_Os08g38900.1	P	GO:0009058	biosynthetic process
LOC_Os08g38900.1	P	GO:0009987	cellular process
LOC_Os08g38900.1	F	GO:0016740	transferase activity
LOC_Os08g38900.1	C	GO:0005829	cytosol
LOC_Os01g65380.1	F	GO:0005215	transporter activity
LOC_Os01g65380.1	C	GO:0005886	plasma membrane
LOC_Os01g65380.1	P	GO:0006810	transport
LOC_Os08g03640.1	C	GO:0005829	cytosol
LOC_Os08g03640.1	F	GO:0005198	structural molecule activity
LOC_Os08g03640.1	P	GO:0006412	translation
LOC_Os08g03640.1	C	GO:0005840	ribosome
LOC_Os01g32080.1	F	GO:0016740	transferase activity
LOC_Os01g32080.1	C	GO:0005829	cytosol
LOC_Os01g32080.1	P	GO:0008152	metabolic process
LOC_Os01g32080.1	F	GO:0005488	binding
LOC_Os02g07870.1	P	GO:0006139	nucleobase-containing compound metabolic process
LOC_Os02g07870.1	P	GO:0009056	catabolic process
LOC_Os02g07870.1	C	GO:0005618	cell wall
LOC_Os02g07870.1	C	GO:0005773	vacuole
LOC_Os02g07870.1	P	GO:0016043	cellular component organization
LOC_Os02g07870.1	F	GO:0005515	protein binding
LOC_Os02g07870.1	F	GO:0005215	transporter activity
LOC_Os02g07870.1	F	GO:0016787	hydrolase activity
LOC_Os02g07870.1	C	GO:0005886	plasma membrane
LOC_Os02g07870.1	C	GO:0009536	plastid
LOC_Os02g07870.1	P	GO:0009628	response to abiotic stimulus
LOC_Os02g07870.1	P	GO:0006950	response to stress
LOC_Os02g07870.1	P	GO:0006810	transport
LOC_Os02g07870.1	F	GO:0000166	nucleotide binding
LOC_Os02g07870.1	P	GO:0007275	multicellular organismal development
LOC_Os03g59310.1	F	GO:0005198	structural molecule activity
LOC_Os03g59310.1	C	GO:0005829	cytosol
LOC_Os03g59310.1	P	GO:0006412	translation
LOC_Os03g59310.1	C	GO:0016020	membrane
LOC_Os03g59310.1	C	GO:0005840	ribosome
LOC_Os05g38640.1	P	GO:0006259	DNA metabolic process
LOC_Os05g38640.1	P	GO:0016043	cellular component organization
LOC_Os05g38640.1	C	GO:0005634	nucleus
LOC_Os05g38640.1	F	GO:0003677	DNA binding
LOC_Os06g51220.2	F	GO:0003700	sequence-specific DNA binding transcription factor activity
LOC_Os06g51220.2	F	GO:0003682	chromatin binding
LOC_Os06g51220.2	F	GO:0005198	structural molecule activity
LOC_Os06g51220.2	P	GO:0006139	nucleobase-containing compound metabolic process
LOC_Os06g51220.2	P	GO:0009058	biosynthetic process
LOC_Os06g51220.2	C	GO:0005634	nucleus
LOC_Os06g51220.2	F	GO:0003677	DNA binding
LOC_Os06g51220.2	P	GO:0016043	cellular component organization
LOC_Os01g55350.1	P	GO:0016043	cellular component organization
LOC_Os01g55350.1	C	GO:0005829	cytosol
LOC_Os01g55350.1	F	GO:0003824	catalytic activity
LOC_Os01g55350.1	F	GO:0005515	protein binding
LOC_Os01g55350.1	P	GO:0006950	response to stress
LOC_Os01g55350.1	P	GO:0007154	cell communication
LOC_Os01g55350.1	P	GO:0009991	response to extracellular stimulus
LOC_Os01g55350.1	C	GO:0005576	extracellular region
LOC_Os01g55350.1	P	GO:0009056	catabolic process
LOC_Os01g55350.1	P	GO:0006091	generation of precursor metabolites and energy
LOC_Os06g49800.1	C	GO:0005886	plasma membrane
LOC_Os06g49800.1	P	GO:0008150	biological_process
LOC_Os06g49800.1	C	GO:0005829	cytosol
LOC_Os06g49800.1	C	GO:0005634	nucleus
LOC_Os06g49800.1	F	GO:0003674	molecular_function
LOC_Os09g07830.2	P	GO:0009790	embryo development
LOC_Os09g07830.2	P	GO:0009791	post-embryonic development
LOC_Os09g07830.2	P	GO:0000003	reproduction
LOC_Os09g07830.2	C	GO:0005886	plasma membrane
LOC_Os09g07830.2	C	GO:0005777	peroxisome
LOC_Os09g07830.2	F	GO:0016740	transferase activity
LOC_Os09g07830.2	C	GO:0005829	cytosol
LOC_Os09g07830.2	P	GO:0008152	metabolic process
LOC_Os03g06670.1	P	GO:0009607	response to biotic stimulus
LOC_Os03g06670.1	P	GO:0006950	response to stress
LOC_Os03g06670.1	P	GO:0009628	response to abiotic stimulus
LOC_Os03g06670.1	P	GO:0009605	response to external stimulus
LOC_Os03g06670.1	F	GO:0005515	protein binding
LOC_Os03g06670.1	C	GO:0005634	nucleus
LOC_Os03g06670.1	F	GO:0003677	DNA binding
LOC_Os03g06670.1	P	GO:0009908	flower development
LOC_Os07g05580.1	F	GO:0005198	structural molecule activity
LOC_Os07g05580.1	C	GO:0005829	cytosol
LOC_Os07g05580.1	C	GO:0005840	ribosome
LOC_Os07g05580.1	P	GO:0006412	translation
LOC_Os07g05580.1	C	GO:0005634	nucleus
LOC_Os05g02530.1	P	GO:0006464	cellular protein modification process
LOC_Os05g02530.1	C	GO:0005886	plasma membrane
LOC_Os05g02530.1	F	GO:0003824	catalytic activity
LOC_Os05g02530.1	C	GO:0005829	cytosol
LOC_Os05g02530.1	F	GO:0005488	binding
LOC_Os12g44150.1	F	GO:0016787	hydrolase activity
LOC_Os12g44150.1	C	GO:0005886	plasma membrane
LOC_Os12g44150.1	P	GO:0006810	transport
LOC_Os12g44150.1	P	GO:0009056	catabolic process
LOC_Os12g44150.1	P	GO:0009058	biosynthetic process
LOC_Os12g44150.1	P	GO:0006139	nucleobase-containing compound metabolic process
LOC_Os08g06100.1	C	GO:0005886	plasma membrane
LOC_Os08g06100.1	C	GO:0005829	cytosol
LOC_Os08g06100.1	F	GO:0005515	protein binding
LOC_Os08g06100.1	F	GO:0016740	transferase activity
LOC_Os08g06100.1	C	GO:0005634	nucleus
LOC_Os08g06100.1	P	GO:0019748	secondary metabolic process
LOC_Os08g06100.1	P	GO:0009987	cellular process
LOC_Os08g06100.1	P	GO:0009058	biosynthetic process
LOC_Os06g18670.1	C	GO:0005829	cytosol
LOC_Os06g18670.1	P	GO:0008152	metabolic process
LOC_Os06g18670.1	F	GO:0016740	transferase activity
LOC_Os07g36140.1	P	GO:0006259	DNA metabolic process
LOC_Os07g36140.1	P	GO:0016043	cellular component organization
LOC_Os07g36140.1	C	GO:0005634	nucleus
LOC_Os07g36140.1	F	GO:0003677	DNA binding
LOC_Os10g10500.1	F	GO:0005215	transporter activity
LOC_Os10g10500.1	F	GO:0016787	hydrolase activity
LOC_Os10g10500.1	C	GO:0009536	plastid
LOC_Os10g10500.1	C	GO:0005886	plasma membrane
LOC_Os10g10500.1	P	GO:0007154	cell communication
LOC_Os10g10500.1	P	GO:0009991	response to extracellular stimulus
LOC_Os10g10500.1	P	GO:0009056	catabolic process
LOC_Os10g10500.1	P	GO:0006139	nucleobase-containing compound metabolic process
LOC_Os10g10500.1	P	GO:0009058	biosynthetic process
LOC_Os10g10500.1	P	GO:0006810	transport
LOC_Os10g10500.1	C	GO:0005773	vacuole
LOC_Os12g25120.1	P	GO:0006259	DNA metabolic process
LOC_Os12g25120.1	P	GO:0016043	cellular component organization
LOC_Os12g25120.1	C	GO:0005634	nucleus
LOC_Os12g25120.1	F	GO:0003677	DNA binding
LOC_Os07g49330.3	P	GO:0006629	lipid metabolic process
LOC_Os07g49330.3	C	GO:0005886	plasma membrane
LOC_Os07g49330.3	F	GO:0016787	hydrolase activity
LOC_Os07g49330.3	P	GO:0007165	signal transduction
LOC_Os02g58340.1	C	GO:0009536	plastid
LOC_Os02g58340.1	C	GO:0005829	cytosol
LOC_Os02g58340.1	F	GO:0016787	hydrolase activity
LOC_Os02g58340.1	P	GO:0019538	protein metabolic process
LOC_Os03g12500.1	P	GO:0009058	biosynthetic process
LOC_Os03g12500.1	P	GO:0009719	response to endogenous stimulus
LOC_Os03g12500.1	P	GO:0006950	response to stress
LOC_Os03g12500.1	P	GO:0006629	lipid metabolic process
LOC_Os03g12500.1	P	GO:0009987	cellular process
LOC_Os03g12500.1	C	GO:0005739	mitochondrion
LOC_Os03g12500.1	F	GO:0019825	oxygen binding
LOC_Os03g12500.1	F	GO:0003824	catalytic activity
LOC_Os03g12500.1	P	GO:0009607	response to biotic stimulus
LOC_Os03g12500.1	C	GO:0009579	thylakoid
LOC_Os03g12500.1	C	GO:0009536	plastid
LOC_Os03g12500.1	C	GO:0016020	membrane
LOC_Os03g61930.3	C	GO:0005829	cytosol
LOC_Os03g61930.3	F	GO:0005515	protein binding
LOC_Os03g61930.3	F	GO:0008289	lipid binding
LOC_Os03g61930.3	P	GO:0009719	response to endogenous stimulus
LOC_Os03g61930.3	P	GO:0009628	response to abiotic stimulus
LOC_Os03g61930.3	P	GO:0006810	transport
LOC_Os03g61930.3	C	GO:0005634	nucleus
LOC_Os02g47140.2	C	GO:0009536	plastid
LOC_Os02g47140.2	F	GO:0005198	structural molecule activity
LOC_Os02g47140.2	F	GO:0005488	binding
LOC_Os02g47140.2	C	GO:0005730	nucleolus
LOC_Os02g47140.2	P	GO:0009987	cellular process
LOC_Os02g47140.2	C	GO:0005773	vacuole
LOC_Os02g47140.2	C	GO:0005829	cytosol
LOC_Os02g47140.2	P	GO:0009628	response to abiotic stimulus
LOC_Os02g47140.2	P	GO:0006950	response to stress
LOC_Os02g47140.2	C	GO:0005840	ribosome
LOC_Os04g39150.1	P	GO:0009607	response to biotic stimulus
LOC_Os04g39150.1	P	GO:0006950	response to stress
LOC_Os04g39150.1	C	GO:0016020	membrane
LOC_Os03g02040.1	P	GO:0008150	biological_process
LOC_Os03g02040.1	F	GO:0003677	DNA binding
LOC_Os03g02040.1	C	GO:0005575	cellular_component
LOC_Os03g18570.1	C	GO:0009536	plastid
LOC_Os03g18570.1	C	GO:0005886	plasma membrane
LOC_Os03g18570.1	F	GO:0005198	structural molecule activity
LOC_Os03g18570.1	C	GO:0005840	ribosome
LOC_Os03g18570.1	P	GO:0006412	translation
LOC_Os03g18570.1	C	GO:0005829	cytosol
LOC_Os03g18570.1	C	GO:0005618	cell wall
LOC_Os03g18570.1	P	GO:0006139	nucleobase-containing compound metabolic process
LOC_Os06g02144.2	P	GO:0009628	response to abiotic stimulus
LOC_Os06g02144.2	P	GO:0006950	response to stress
LOC_Os06g02144.2	C	GO:0005829	cytosol
LOC_Os06g02144.2	F	GO:0000166	nucleotide binding
LOC_Os06g02144.2	C	GO:0005777	peroxisome
LOC_Os06g02144.2	F	GO:0003824	catalytic activity
LOC_Os06g02144.2	P	GO:0008152	metabolic process
LOC_Os08g06550.1	C	GO:0005886	plasma membrane
LOC_Os08g06550.1	C	GO:0005829	cytosol
LOC_Os08g06550.1	P	GO:0006950	response to stress
LOC_Os08g06550.1	P	GO:0006810	transport
LOC_Os08g06550.1	P	GO:0009628	response to abiotic stimulus
LOC_Os08g06550.1	F	GO:0008289	lipid binding
LOC_Os01g13690.2	C	GO:0009536	plastid
LOC_Os01g13690.2	P	GO:0009987	cellular process
LOC_Os01g13690.2	P	GO:0009058	biosynthetic process
LOC_Os01g13690.2	F	GO:0003824	catalytic activity
LOC_Os03g18580.1	C	GO:0009536	plastid
LOC_Os03g18580.1	C	GO:0005886	plasma membrane
LOC_Os03g18580.1	F	GO:0005198	structural molecule activity
LOC_Os03g18580.1	C	GO:0005840	ribosome
LOC_Os03g18580.1	P	GO:0006412	translation
LOC_Os03g18580.1	C	GO:0005829	cytosol
LOC_Os03g18580.1	C	GO:0005618	cell wall
LOC_Os03g18580.1	P	GO:0006139	nucleobase-containing compound metabolic process
LOC_Os08g39850.1	F	GO:0003824	catalytic activity
LOC_Os08g39850.1	P	GO:0006629	lipid metabolic process
LOC_Os08g39850.1	P	GO:0009987	cellular process
LOC_Os08g39850.1	P	GO:0009058	biosynthetic process
LOC_Os08g39850.1	F	GO:0005515	protein binding
LOC_Os08g39850.1	P	GO:0009719	response to endogenous stimulus
LOC_Os08g39850.1	P	GO:0009628	response to abiotic stimulus
LOC_Os08g39850.1	P	GO:0009607	response to biotic stimulus
LOC_Os08g39850.1	C	GO:0009579	thylakoid
LOC_Os08g39850.1	C	GO:0009536	plastid
LOC_Os08g39850.1	C	GO:0016020	membrane
LOC_Os08g39850.1	P	GO:0006950	response to stress
LOC_Os04g35570.1	F	GO:0003682	chromatin binding
LOC_Os04g35570.1	C	GO:0005829	cytosol
LOC_Os04g35570.1	P	GO:0008152	metabolic process
LOC_Os04g35570.1	F	GO:0030234	enzyme regulator activity
LOC_Os04g35570.1	P	GO:0009605	response to external stimulus
LOC_Os04g35570.1	P	GO:0009628	response to abiotic stimulus
LOC_Os04g35570.1	C	GO:0005634	nucleus
LOC_Os01g63270.1	C	GO:0009536	plastid
LOC_Os01g63270.1	C	GO:0005829	cytosol
LOC_Os01g63270.1	P	GO:0009628	response to abiotic stimulus
LOC_Os01g63270.1	P	GO:0006950	response to stress
LOC_Os01g63270.1	P	GO:0008152	metabolic process
LOC_Os01g63270.1	F	GO:0016740	transferase activity
LOC_Os10g18340.1	P	GO:0009607	response to biotic stimulus
LOC_Os10g18340.1	P	GO:0009628	response to abiotic stimulus
LOC_Os10g18340.1	P	GO:0006950	response to stress
LOC_Os10g18340.1	P	GO:0007165	signal transduction
LOC_Os10g18340.1	P	GO:0009719	response to endogenous stimulus
LOC_Os10g18340.1	C	GO:0005575	cellular_component
LOC_Os10g18340.1	F	GO:0003674	molecular_function
LOC_Os01g73160.1	F	GO:0005198	structural molecule activity
LOC_Os01g73160.1	C	GO:0005840	ribosome
LOC_Os01g73160.1	P	GO:0006412	translation
LOC_Os01g73160.1	C	GO:0005829	cytosol
LOC_Os01g73160.1	C	GO:0016020	membrane
LOC_Os06g40040.2	F	GO:0003676	nucleic acid binding
LOC_Os06g40040.2	P	GO:0008150	biological_process
LOC_Os06g40040.2	C	GO:0005829	cytosol
LOC_Os08g02340.1	C	GO:0005829	cytosol
LOC_Os08g02340.1	F	GO:0005198	structural molecule activity
LOC_Os08g02340.1	P	GO:0006412	translation
LOC_Os08g02340.1	C	GO:0005840	ribosome
LOC_Os01g11054.2	P	GO:0016043	cellular component organization
LOC_Os01g11054.2	C	GO:0005829	cytosol
LOC_Os01g11054.2	F	GO:0003824	catalytic activity
LOC_Os01g11054.2	F	GO:0005515	protein binding
LOC_Os01g11054.2	P	GO:0006950	response to stress
LOC_Os01g11054.2	P	GO:0007154	cell communication
LOC_Os01g11054.2	P	GO:0009991	response to extracellular stimulus
LOC_Os01g11054.2	C	GO:0005576	extracellular region
LOC_Os01g11054.2	P	GO:0009056	catabolic process
LOC_Os01g11054.2	P	GO:0006091	generation of precursor metabolites and energy
LOC_Os03g27310.2	P	GO:0006259	DNA metabolic process
LOC_Os03g27310.2	P	GO:0016043	cellular component organization
LOC_Os03g27310.2	F	GO:0003677	DNA binding
LOC_Os11g05730.1	P	GO:0006259	DNA metabolic process
LOC_Os11g05730.1	P	GO:0016043	cellular component organization
LOC_Os11g05730.1	F	GO:0005515	protein binding
LOC_Os11g05730.1	F	GO:0003677	DNA binding
LOC_Os01g59790.1	C	GO:0005886	plasma membrane
LOC_Os01g59790.1	F	GO:0000166	nucleotide binding
LOC_Os01g59790.1	F	GO:0030234	enzyme regulator activity
LOC_Os01g59790.1	C	GO:0005829	cytosol
LOC_Os01g59790.1	F	GO:0005515	protein binding
LOC_Os01g59790.1	C	GO:0005773	vacuole
LOC_Os01g59790.1	P	GO:0006464	cellular protein modification process
LOC_Os01g59790.1	P	GO:0009058	biosynthetic process
LOC_Os05g22970.1	C	GO:0009536	plastid
LOC_Os05g22970.1	F	GO:0005515	protein binding
LOC_Os05g22970.1	P	GO:0005975	carbohydrate metabolic process
LOC_Os05g22970.1	C	GO:0005829	cytosol
LOC_Os05g22970.1	F	GO:0003824	catalytic activity
LOC_Os07g12170.1	F	GO:0000166	nucleotide binding
LOC_Os07g12170.1	C	GO:0005794	Golgi apparatus
LOC_Os07g12170.1	F	GO:0030234	enzyme regulator activity
LOC_Os07g12170.1	P	GO:0006464	cellular protein modification process
LOC_Os07g12170.1	P	GO:0009058	biosynthetic process
LOC_Os01g42294.1	C	GO:0005886	plasma membrane
LOC_Os01g42294.1	P	GO:0006464	cellular protein modification process
LOC_Os01g42294.1	F	GO:0000166	nucleotide binding
LOC_Os01g42294.1	F	GO:0005515	protein binding
LOC_Os01g42294.1	F	GO:0016301	kinase activity
LOC_Os01g42294.1	P	GO:0007165	signal transduction
LOC_Os03g20630.1	C	GO:0005886	plasma membrane
LOC_Os03g20630.1	C	GO:0005777	peroxisome
LOC_Os03g20630.1	P	GO:0006139	nucleobase-containing compound metabolic process
LOC_Os03g20630.1	F	GO:0005515	protein binding
LOC_Os03g20630.1	F	GO:0016787	hydrolase activity
LOC_Os08g02700.1	C	GO:0005886	plasma membrane
LOC_Os08g02700.1	C	GO:0005739	mitochondrion
LOC_Os08g02700.1	P	GO:0009628	response to abiotic stimulus
LOC_Os08g02700.1	P	GO:0006950	response to stress
LOC_Os08g02700.1	F	GO:0005488	binding
LOC_Os08g02700.1	C	GO:0005829	cytosol
LOC_Os08g02700.1	P	GO:0009056	catabolic process
LOC_Os08g02700.1	P	GO:0006139	nucleobase-containing compound metabolic process
LOC_Os08g02700.1	P	GO:0005975	carbohydrate metabolic process
LOC_Os11g08300.1	P	GO:0009719	response to endogenous stimulus
LOC_Os11g08300.1	P	GO:0008152	metabolic process
LOC_Os11g08300.1	C	GO:0009536	plastid
LOC_Os11g08300.1	P	GO:0009628	response to abiotic stimulus
LOC_Os11g08300.1	P	GO:0006950	response to stress
LOC_Os11g08300.1	F	GO:0003824	catalytic activity
LOC_Os11g26860.1	C	GO:0005886	plasma membrane
LOC_Os11g26860.1	F	GO:0005488	binding
LOC_Os11g26860.1	C	GO:0005829	cytosol
LOC_Os11g26860.1	F	GO:0016740	transferase activity
LOC_Os11g26860.1	P	GO:0009987	cellular process
LOC_Os11g26860.1	P	GO:0008152	metabolic process
LOC_Os03g55150.4	P	GO:0006464	cellular protein modification process
LOC_Os03g55150.4	P	GO:0006412	translation
LOC_Os03g55150.4	P	GO:0016043	cellular component organization
LOC_Os03g55150.4	F	GO:0008135	translation factor activity, nucleic acid binding
LOC_Os11g16590.1	P	GO:0006139	nucleobase-containing compound metabolic process
LOC_Os11g16590.1	P	GO:0009056	catabolic process
LOC_Os11g16590.1	C	GO:0005618	cell wall
LOC_Os11g16590.1	F	GO:0016787	hydrolase activity
LOC_Os11g16590.1	C	GO:0005739	mitochondrion
LOC_Os11g16590.1	P	GO:0009058	biosynthetic process
LOC_Os11g16590.1	P	GO:0006810	transport
LOC_Os11g16590.1	P	GO:0016043	cellular component organization
LOC_Os11g16590.1	F	GO:0000166	nucleotide binding
LOC_Os11g16590.1	C	GO:0009579	thylakoid
LOC_Os11g16590.1	C	GO:0009536	plastid
LOC_Os11g16590.1	C	GO:0016020	membrane
LOC_Os11g32650.1	F	GO:0016740	transferase activity
LOC_Os11g32650.1	P	GO:0006810	transport
LOC_Os11g32650.1	C	GO:0005773	vacuole
LOC_Os11g32650.1	C	GO:0016020	membrane
LOC_Os11g32650.1	P	GO:0009628	response to abiotic stimulus
LOC_Os11g32650.1	P	GO:0019748	secondary metabolic process
LOC_Os11g32650.1	P	GO:0009987	cellular process
LOC_Os11g32650.1	P	GO:0009058	biosynthetic process
LOC_Os11g32650.1	C	GO:0005783	endoplasmic reticulum
LOC_Os11g32650.1	C	GO:0005634	nucleus
LOC_Os11g32650.1	P	GO:0009719	response to endogenous stimulus
LOC_Os11g32650.1	P	GO:0006950	response to stress
LOC_Os03g12250.1	C	GO:0005886	plasma membrane
LOC_Os03g12250.1	P	GO:0006464	cellular protein modification process
LOC_Os03g12250.1	F	GO:0000166	nucleotide binding
LOC_Os03g12250.1	F	GO:0005515	protein binding
LOC_Os03g12250.1	F	GO:0016301	kinase activity
LOC_Os03g12250.1	P	GO:0007165	signal transduction
LOC_Os03g12250.1	C	GO:0005773	vacuole
LOC_Os04g47690.1	F	GO:0005198	structural molecule activity
LOC_Os04g47690.1	F	GO:0003700	sequence-specific DNA binding transcription factor activity
LOC_Os04g47690.1	F	GO:0003682	chromatin binding
LOC_Os04g47690.1	P	GO:0006139	nucleobase-containing compound metabolic process
LOC_Os04g47690.1	P	GO:0009058	biosynthetic process
LOC_Os04g47690.1	C	GO:0005622	intracellular
LOC_Os04g47690.1	F	GO:0003677	DNA binding
LOC_Os04g47690.1	P	GO:0016043	cellular component organization
LOC_Os05g27940.1	C	GO:0009536	plastid
LOC_Os05g27940.1	C	GO:0005886	plasma membrane
LOC_Os05g27940.1	F	GO:0005198	structural molecule activity
LOC_Os05g27940.1	C	GO:0005840	ribosome
LOC_Os05g27940.1	P	GO:0006412	translation
LOC_Os05g27940.1	C	GO:0005829	cytosol
LOC_Os05g27940.1	C	GO:0005618	cell wall
LOC_Os05g27940.1	P	GO:0006139	nucleobase-containing compound metabolic process
LOC_Os02g27760.1	C	GO:0005886	plasma membrane
LOC_Os02g27760.1	C	GO:0005840	ribosome
LOC_Os02g27760.1	F	GO:0005198	structural molecule activity
LOC_Os02g27760.1	P	GO:0006412	translation
LOC_Os02g27760.1	C	GO:0005829	cytosol
LOC_Os02g27760.1	C	GO:0005618	cell wall
LOC_Os02g27760.1	C	GO:0005773	vacuole
LOC_Os02g46962.3	C	GO:0005886	plasma membrane
LOC_Os02g46962.3	C	GO:0005829	cytosol
LOC_Os02g46962.3	F	GO:0005215	transporter activity
LOC_Os02g46962.3	C	GO:0005794	Golgi apparatus
LOC_Os02g46962.3	P	GO:0009987	cellular process
LOC_Os02g46962.3	P	GO:0006810	transport
LOC_Os06g14370.3	P	GO:0009719	response to endogenous stimulus
LOC_Os06g14370.3	P	GO:0009628	response to abiotic stimulus
LOC_Os06g14370.3	P	GO:0006950	response to stress
LOC_Os06g14370.3	F	GO:0005488	binding
LOC_Os06g37440.1	C	GO:0005886	plasma membrane
LOC_Os06g37440.1	C	GO:0005829	cytosol
LOC_Os06g37440.1	C	GO:0005618	cell wall
LOC_Os06g37440.1	C	GO:0005773	vacuole
LOC_Os06g37440.1	P	GO:0006412	translation
LOC_Os06g37440.1	F	GO:0008135	translation factor activity, nucleic acid binding
LOC_Os05g25640.1	F	GO:0003824	catalytic activity
LOC_Os05g25640.1	C	GO:0005886	plasma membrane
LOC_Os05g25640.1	P	GO:0040007	growth
LOC_Os05g25640.1	P	GO:0019748	secondary metabolic process
LOC_Os05g25640.1	P	GO:0009987	cellular process
LOC_Os05g25640.1	P	GO:0009058	biosynthetic process
LOC_Os05g25640.1	C	GO:0005618	cell wall
LOC_Os05g25640.1	C	GO:0005773	vacuole
LOC_Os05g25640.1	P	GO:0009628	response to abiotic stimulus
LOC_Os05g25640.1	P	GO:0007275	multicellular organismal development
LOC_Os05g25640.1	C	GO:0005783	endoplasmic reticulum
LOC_Os05g25640.1	P	GO:0006950	response to stress
LOC_Os02g44630.2	C	GO:0005886	plasma membrane
LOC_Os02g44630.2	P	GO:0009628	response to abiotic stimulus
LOC_Os02g44630.2	P	GO:0006950	response to stress
LOC_Os02g44630.2	P	GO:0009987	cellular process
LOC_Os02g44630.2	F	GO:0005215	transporter activity
LOC_Os02g44630.2	P	GO:0006810	transport
LOC_Os03g29190.1	F	GO:0003824	catalytic activity
LOC_Os03g29190.1	C	GO:0005829	cytosol
LOC_Os03g29190.1	P	GO:0016049	cell growth
LOC_Os03g29190.1	P	GO:0030154	cell differentiation
LOC_Os03g29190.1	P	GO:0009653	anatomical structure morphogenesis
LOC_Os03g29190.1	P	GO:0016043	cellular component organization
LOC_Os03g29190.1	P	GO:0008152	metabolic process
LOC_Os03g29190.1	P	GO:0007275	multicellular organismal development
LOC_Os03g29190.1	P	GO:0009605	response to external stimulus
LOC_Os03g29190.1	P	GO:0009856	pollination
LOC_Os02g04100.1	C	GO:0005886	plasma membrane
LOC_Os02g04100.1	C	GO:0005829	cytosol
LOC_Os02g04100.1	P	GO:0009987	cellular process
LOC_Os02g04100.1	P	GO:0009056	catabolic process
LOC_Os02g04100.1	P	GO:0019538	protein metabolic process
LOC_Os02g04100.1	F	GO:0016787	hydrolase activity
LOC_Os07g33110.2	C	GO:0005886	plasma membrane
LOC_Os07g33110.2	F	GO:0005515	protein binding
LOC_Os07g33110.2	F	GO:0016301	kinase activity
LOC_Os07g33110.2	P	GO:0006464	cellular protein modification process
LOC_Os07g33110.2	P	GO:0009058	biosynthetic process
LOC_Os07g33110.2	F	GO:0000166	nucleotide binding
LOC_Os01g68770.1	P	GO:0006950	response to stress
LOC_Os01g68770.1	F	GO:0005488	binding
LOC_Os01g68770.1	C	GO:0005829	cytosol
LOC_Os01g68770.1	P	GO:0009987	cellular process
LOC_Os01g68770.1	P	GO:0008152	metabolic process
LOC_Os03g58840.1	P	GO:0009987	cellular process
LOC_Os03g58840.1	C	GO:0005886	plasma membrane
LOC_Os03g58840.1	C	GO:0005768	endosome
LOC_Os03g58840.1	F	GO:0003674	molecular_function
LOC_Os03g58840.1	P	GO:0006810	transport
LOC_Os04g32650.1	C	GO:0005739	mitochondrion
LOC_Os04g32650.1	C	GO:0005829	cytosol
LOC_Os04g32650.1	P	GO:0006412	translation
LOC_Os04g32650.1	P	GO:0006139	nucleobase-containing compound metabolic process
LOC_Os04g32650.1	F	GO:0000166	nucleotide binding
LOC_Os04g32650.1	F	GO:0003824	catalytic activity
LOC_Os04g46960.4	F	GO:0003824	catalytic activity
LOC_Os04g46960.4	C	GO:0005829	cytosol
LOC_Os04g46960.4	P	GO:0006464	cellular protein modification process
LOC_Os04g46960.4	P	GO:0009058	biosynthetic process
LOC_Os04g46960.4	P	GO:0006950	response to stress
LOC_Os05g28740.1	C	GO:0005773	vacuole
LOC_Os05g28740.1	P	GO:0006950	response to stress
LOC_Os05g28740.1	F	GO:0003674	molecular_function
LOC_Os08g06380.1	P	GO:0007275	multicellular organismal development
LOC_Os08g06380.1	C	GO:0005794	Golgi apparatus
LOC_Os08g06380.1	P	GO:0005975	carbohydrate metabolic process
LOC_Os08g06380.1	P	GO:0009058	biosynthetic process
LOC_Os08g06380.1	P	GO:0009987	cellular process
LOC_Os08g06380.1	P	GO:0009628	response to abiotic stimulus
LOC_Os08g06380.1	P	GO:0006950	response to stress
LOC_Os08g06380.1	F	GO:0016740	transferase activity
LOC_Os10g42724.1	C	GO:0005886	plasma membrane
LOC_Os10g42724.1	C	GO:0005829	cytosol
LOC_Os10g42724.1	F	GO:0005215	transporter activity
LOC_Os10g42724.1	C	GO:0005794	Golgi apparatus
LOC_Os10g42724.1	P	GO:0009987	cellular process
LOC_Os10g42724.1	P	GO:0006810	transport
LOC_Os01g27880.1	C	GO:0005829	cytosol
LOC_Os01g27880.1	C	GO:0005634	nucleus
LOC_Os01g27880.1	P	GO:0009987	cellular process
LOC_Os01g27880.1	P	GO:0005975	carbohydrate metabolic process
LOC_Os01g27880.1	P	GO:0009058	biosynthetic process
LOC_Os01g27880.1	F	GO:0016787	hydrolase activity
LOC_Os01g27880.1	F	GO:0005488	binding
LOC_Os01g58890.1	F	GO:0005488	binding
LOC_Os01g58890.1	F	GO:0030234	enzyme regulator activity
LOC_Os01g58890.1	P	GO:0009628	response to abiotic stimulus
LOC_Os01g58890.1	C	GO:0005829	cytosol
LOC_Os01g58890.1	P	GO:0008152	metabolic process
LOC_Os04g56520.2	P	GO:0009628	response to abiotic stimulus
LOC_Os04g56520.2	P	GO:0006950	response to stress
LOC_Os04g56520.2	C	GO:0005794	Golgi apparatus
LOC_Os04g56520.2	C	GO:0005829	cytosol
LOC_Os04g56520.2	F	GO:0005515	protein binding
LOC_Os04g56520.2	P	GO:0008152	metabolic process
LOC_Os07g09340.1	F	GO:0016787	hydrolase activity
LOC_Os07g09340.1	C	GO:0005886	plasma membrane
LOC_Os07g09340.1	P	GO:0006810	transport
LOC_Os07g09340.1	P	GO:0009056	catabolic process
LOC_Os07g09340.1	P	GO:0009058	biosynthetic process
LOC_Os07g09340.1	P	GO:0006139	nucleobase-containing compound metabolic process
LOC_Os10g10244.1	C	GO:0009536	plastid
LOC_Os10g10244.1	C	GO:0005739	mitochondrion
LOC_Os10g10244.1	P	GO:0006139	nucleobase-containing compound metabolic process
LOC_Os10g10244.1	P	GO:0006412	translation
LOC_Os10g10244.1	C	GO:0005829	cytosol
LOC_Os10g10244.1	F	GO:0003676	nucleic acid binding
LOC_Os10g10244.1	F	GO:0000166	nucleotide binding
LOC_Os10g10244.1	F	GO:0003824	catalytic activity
LOC_Os02g01520.1	C	GO:0005886	plasma membrane
LOC_Os02g01520.1	F	GO:0005515	protein binding
LOC_Os02g01520.1	P	GO:0009628	response to abiotic stimulus
LOC_Os02g01520.1	P	GO:0006950	response to stress
LOC_Os02g01520.1	C	GO:0005783	endoplasmic reticulum
LOC_Os02g01520.1	P	GO:0009987	cellular process
LOC_Os02g01520.1	P	GO:0019538	protein metabolic process
LOC_Os05g01470.2	P	GO:0006139	nucleobase-containing compound metabolic process
LOC_Os05g01470.2	C	GO:0005829	cytosol
LOC_Os05g01470.2	F	GO:0016740	transferase activity
LOC_Os05g49890.2	F	GO:0016787	hydrolase activity
LOC_Os05g49890.2	F	GO:0000166	nucleotide binding
LOC_Os05g49890.2	P	GO:0006810	transport
LOC_Os05g49890.2	P	GO:0006139	nucleobase-containing compound metabolic process
LOC_Os05g49890.2	P	GO:0009056	catabolic process
LOC_Os05g49890.2	C	GO:0005575	cellular_component
LOC_Os05g49890.2	F	GO:0005515	protein binding
LOC_Os06g07878.1	C	GO:0005840	ribosome
LOC_Os06g07878.1	C	GO:0005829	cytosol
LOC_Os06g07878.1	P	GO:0009987	cellular process
LOC_Os06g07878.1	P	GO:0009056	catabolic process
LOC_Os06g07878.1	P	GO:0019538	protein metabolic process
LOC_Os06g07878.1	C	GO:0005773	vacuole
LOC_Os06g07878.1	F	GO:0016787	hydrolase activity
LOC_Os07g46370.1	C	GO:0005829	cytosol
LOC_Os07g46370.1	C	GO:0016020	membrane
LOC_Os07g46370.1	F	GO:0003674	molecular_function
LOC_Os03g22120.3	P	GO:0009791	post-embryonic development
LOC_Os03g22120.3	P	GO:0000003	reproduction
LOC_Os03g22120.3	F	GO:0016740	transferase activity
LOC_Os03g22120.3	P	GO:0009987	cellular process
LOC_Os03g22120.3	P	GO:0005975	carbohydrate metabolic process
LOC_Os03g22120.3	P	GO:0009058	biosynthetic process
LOC_Os10g27190.1	F	GO:0005198	structural molecule activity
LOC_Os10g27190.1	C	GO:0005829	cytosol
LOC_Os10g27190.1	P	GO:0006412	translation
LOC_Os10g27190.1	P	GO:0016043	cellular component organization
LOC_Os10g27190.1	C	GO:0005840	ribosome
LOC_Os01g60410.3	F	GO:0003824	catalytic activity
LOC_Os01g60410.3	P	GO:0006464	cellular protein modification process
LOC_Os01g60410.3	P	GO:0009056	catabolic process
LOC_Os01g60410.3	C	GO:0005575	cellular_component
LOC_Os01g08200.1	P	GO:0009790	embryo development
LOC_Os01g08200.1	P	GO:0009791	post-embryonic development
LOC_Os01g08200.1	P	GO:0000003	reproduction
LOC_Os01g08200.1	P	GO:0016049	cell growth
LOC_Os01g08200.1	P	GO:0030154	cell differentiation
LOC_Os01g08200.1	P	GO:0009653	anatomical structure morphogenesis
LOC_Os01g08200.1	P	GO:0006464	cellular protein modification process
LOC_Os01g08200.1	C	GO:0005829	cytosol
LOC_Os01g08200.1	F	GO:0016787	hydrolase activity
LOC_Os05g37330.1	C	GO:0009536	plastid
LOC_Os05g37330.1	C	GO:0005886	plasma membrane
LOC_Os05g37330.1	F	GO:0005198	structural molecule activity
LOC_Os05g37330.1	C	GO:0005829	cytosol
LOC_Os05g37330.1	C	GO:0005730	nucleolus
LOC_Os05g37330.1	P	GO:0006412	translation
LOC_Os05g37330.1	P	GO:0009628	response to abiotic stimulus
LOC_Os05g37330.1	P	GO:0006950	response to stress
LOC_Os05g37330.1	C	GO:0005840	ribosome
LOC_Os01g68950.1	C	GO:0005829	cytosol
LOC_Os01g68950.1	F	GO:0005515	protein binding
LOC_Os01g68950.1	P	GO:0009058	biosynthetic process
LOC_Os01g68950.1	P	GO:0006139	nucleobase-containing compound metabolic process
LOC_Os01g68950.1	P	GO:0009628	response to abiotic stimulus
LOC_Os01g68950.1	P	GO:0006950	response to stress
LOC_Os01g68950.1	C	GO:0005634	nucleus
LOC_Os01g68950.1	P	GO:0006464	cellular protein modification process
LOC_Os06g43660.3	P	GO:0007275	multicellular organismal development
LOC_Os06g43660.3	P	GO:0008152	metabolic process
LOC_Os06g43660.3	P	GO:0009987	cellular process
LOC_Os06g43660.3	F	GO:0005215	transporter activity
LOC_Os06g43660.3	F	GO:0016787	hydrolase activity
LOC_Os06g43660.3	C	GO:0005886	plasma membrane
LOC_Os06g43660.3	C	GO:0005739	mitochondrion
LOC_Os06g43660.3	C	GO:0009536	plastid
LOC_Os06g43660.3	P	GO:0006810	transport
LOC_Os06g43660.3	C	GO:0005773	vacuole
LOC_Os06g43660.3	P	GO:0009628	response to abiotic stimulus
LOC_Os06g43660.3	P	GO:0006950	response to stress
LOC_Os06g43660.3	C	GO:0005768	endosome
LOC_Os03g29240.1	F	GO:0003824	catalytic activity
LOC_Os03g29240.1	C	GO:0005829	cytosol
LOC_Os03g29240.1	P	GO:0016049	cell growth
LOC_Os03g29240.1	P	GO:0030154	cell differentiation
LOC_Os03g29240.1	P	GO:0009653	anatomical structure morphogenesis
LOC_Os03g29240.1	P	GO:0016043	cellular component organization
LOC_Os03g29240.1	P	GO:0008152	metabolic process
LOC_Os03g29240.1	P	GO:0007275	multicellular organismal development
LOC_Os03g29240.1	P	GO:0009605	response to external stimulus
LOC_Os03g29240.1	P	GO:0009856	pollination
LOC_Os07g47510.1	C	GO:0005773	vacuole
LOC_Os07g47510.1	P	GO:0008150	biological_process
LOC_Os08g42540.1	P	GO:0008150	biological_process
LOC_Os08g42540.1	C	GO:0005575	cellular_component
LOC_Os08g42540.1	F	GO:0003674	molecular_function
LOC_Os03g51150.1	P	GO:0008150	biological_process
LOC_Os03g51150.1	C	GO:0005575	cellular_component
LOC_Os03g51150.1	F	GO:0003674	molecular_function
LOC_Os12g29400.1	P	GO:0008150	biological_process
LOC_Os12g29400.1	F	GO:0003674	molecular_function
LOC_Os08g22354.2	P	GO:0009628	response to abiotic stimulus
LOC_Os08g22354.2	P	GO:0006950	response to stress
LOC_Os08g22354.2	C	GO:0005829	cytosol
LOC_Os08g22354.2	F	GO:0008135	translation factor activity, nucleic acid binding
LOC_Os08g22354.2	P	GO:0006412	translation
LOC_Os09g02700.1	C	GO:0005829	cytosol
LOC_Os09g02700.1	F	GO:0008135	translation factor activity, nucleic acid binding
LOC_Os09g02700.1	P	GO:0006412	translation
LOC_Os12g44310.2	C	GO:0005886	plasma membrane
LOC_Os12g44310.2	C	GO:0005773	vacuole
LOC_Os12g44310.2	P	GO:0006629	lipid metabolic process
LOC_Os12g44310.2	P	GO:0009987	cellular process
LOC_Os12g44310.2	P	GO:0009056	catabolic process
LOC_Os12g44310.2	F	GO:0003824	catalytic activity
LOC_Os12g44310.2	P	GO:0009628	response to abiotic stimulus
LOC_Os12g44310.2	P	GO:0006950	response to stress
LOC_Os04g57400.1	P	GO:0009719	response to endogenous stimulus
LOC_Os04g57400.1	P	GO:0009058	biosynthetic process
LOC_Os04g57400.1	C	GO:0005829	cytosol
LOC_Os04g57400.1	F	GO:0005515	protein binding
LOC_Os04g57400.1	F	GO:0016301	kinase activity
LOC_Os04g57400.1	P	GO:0009987	cellular process
LOC_Os05g01820.1	F	GO:0005515	protein binding
LOC_Os05g01820.1	C	GO:0005575	cellular_component
LOC_Os10g30790.2	C	GO:0005886	plasma membrane
LOC_Os10g30790.2	C	GO:0005773	vacuole
LOC_Os10g30790.2	P	GO:0009719	response to endogenous stimulus
LOC_Os10g30790.2	F	GO:0005215	transporter activity
LOC_Os10g30790.2	P	GO:0009987	cellular process
LOC_Os10g30790.2	P	GO:0006810	transport
LOC_Os10g30790.2	C	GO:0005634	nucleus
LOC_Os11g48080.1	C	GO:0005886	plasma membrane
LOC_Os11g48080.1	P	GO:0009628	response to abiotic stimulus
LOC_Os11g48080.1	C	GO:0005829	cytosol
LOC_Os11g48080.1	P	GO:0006950	response to stress
LOC_Os11g48080.1	F	GO:0005515	protein binding
LOC_Os11g48080.1	P	GO:0009987	cellular process
LOC_Os11g48080.1	P	GO:0009058	biosynthetic process
LOC_Os02g03260.1	C	GO:0009536	plastid
LOC_Os02g03260.1	P	GO:0019748	secondary metabolic process
LOC_Os02g03260.1	P	GO:0009987	cellular process
LOC_Os02g03260.1	P	GO:0005975	carbohydrate metabolic process
LOC_Os02g03260.1	P	GO:0009058	biosynthetic process
LOC_Os02g03260.1	F	GO:0003824	catalytic activity
LOC_Os03g10620.3	F	GO:0003824	catalytic activity
LOC_Os03g10620.3	P	GO:0008152	metabolic process
LOC_Os03g13970.2	P	GO:0009908	flower development
LOC_Os03g13970.2	P	GO:0007165	signal transduction
LOC_Os03g13970.2	C	GO:0005634	nucleus
LOC_Os03g13970.2	P	GO:0009628	response to abiotic stimulus
LOC_Os03g13970.2	F	GO:0004871	signal transducer activity
LOC_Os03g13970.2	F	GO:0005488	binding
LOC_Os03g13970.2	F	GO:0004872	receptor activity
LOC_Os03g13970.2	C	GO:0005829	cytosol
LOC_Os03g13970.2	P	GO:0009056	catabolic process
LOC_Os03g13970.2	P	GO:0019538	protein metabolic process
LOC_Os03g13970.2	P	GO:0016049	cell growth
LOC_Os03g13970.2	P	GO:0030154	cell differentiation
LOC_Os03g13970.2	P	GO:0009653	anatomical structure morphogenesis
LOC_Os03g13970.2	P	GO:0006950	response to stress
LOC_Os03g13970.2	P	GO:0009719	response to endogenous stimulus
LOC_Os03g13970.2	P	GO:0016043	cellular component organization
LOC_Os03g13970.2	C	GO:0016020	membrane
LOC_Os03g14690.1	F	GO:0005215	transporter activity
LOC_Os03g14690.1	F	GO:0016787	hydrolase activity
LOC_Os03g14690.1	C	GO:0009536	plastid
LOC_Os03g14690.1	C	GO:0005886	plasma membrane
LOC_Os03g14690.1	P	GO:0007154	cell communication
LOC_Os03g14690.1	P	GO:0009991	response to extracellular stimulus
LOC_Os03g14690.1	P	GO:0009056	catabolic process
LOC_Os03g14690.1	P	GO:0006139	nucleobase-containing compound metabolic process
LOC_Os03g14690.1	P	GO:0009058	biosynthetic process
LOC_Os03g14690.1	P	GO:0006810	transport
LOC_Os03g14690.1	C	GO:0005773	vacuole
LOC_Os04g58240.1	C	GO:0005886	plasma membrane
LOC_Os04g58240.1	F	GO:0005198	structural molecule activity
LOC_Os04g58240.1	C	GO:0005829	cytosol
LOC_Os04g58240.1	P	GO:0009987	cellular process
LOC_Os04g58240.1	P	GO:0006810	transport
LOC_Os05g45660.2	C	GO:0005886	plasma membrane
LOC_Os05g45660.2	P	GO:0008150	biological_process
LOC_Os05g45660.2	F	GO:0003723	RNA binding
LOC_Os08g35480.1	P	GO:0008150	biological_process
LOC_Os08g35480.1	C	GO:0005829	cytosol
LOC_Os08g35480.1	F	GO:0003674	molecular_function
LOC_Os08g42740.3	F	GO:0003824	catalytic activity
LOC_Os08g42740.3	P	GO:0006464	cellular protein modification process
LOC_Os02g56000.1	F	GO:0016787	hydrolase activity
LOC_Os02g56000.1	F	GO:0005515	protein binding
LOC_Os02g56000.1	P	GO:0006139	nucleobase-containing compound metabolic process
LOC_Os02g56000.1	C	GO:0005829	cytosol
LOC_Os02g56000.1	P	GO:0009056	catabolic process
LOC_Os02g56000.1	P	GO:0019538	protein metabolic process
LOC_Os02g56000.1	P	GO:0007275	multicellular organismal development
LOC_Os02g56000.1	C	GO:0005634	nucleus
LOC_Os05g49180.1	P	GO:0008150	biological_process
LOC_Os05g49180.1	C	GO:0005575	cellular_component
LOC_Os05g49180.1	F	GO:0003674	molecular_function
LOC_Os07g43170.3	C	GO:0005829	cytosol
LOC_Os07g43170.3	P	GO:0006139	nucleobase-containing compound metabolic process
LOC_Os07g43170.3	F	GO:0016301	kinase activity
LOC_Os10g35870.1	C	GO:0005634	nucleus
LOC_Os10g35870.1	C	GO:0009579	thylakoid
LOC_Os10g35870.1	C	GO:0009536	plastid
LOC_Os10g35870.1	C	GO:0016020	membrane
LOC_Os10g35870.1	F	GO:0005488	binding
LOC_Os02g04710.1	C	GO:0005773	vacuole
LOC_Os02g04710.1	P	GO:0006629	lipid metabolic process
LOC_Os02g04710.1	P	GO:0009058	biosynthetic process
LOC_Os02g04710.1	P	GO:0009987	cellular process
LOC_Os02g04710.1	P	GO:0016043	cellular component organization
LOC_Os02g04710.1	F	GO:0003824	catalytic activity
LOC_Os02g04710.1	P	GO:0007275	multicellular organismal development
LOC_Os02g13530.1	C	GO:0009536	plastid
LOC_Os02g13530.1	C	GO:0005886	plasma membrane
LOC_Os02g13530.1	F	GO:0005198	structural molecule activity
LOC_Os02g13530.1	F	GO:0000166	nucleotide binding
LOC_Os02g13530.1	C	GO:0005829	cytosol
LOC_Os02g13530.1	C	GO:0005730	nucleolus
LOC_Os02g13530.1	C	GO:0005773	vacuole
LOC_Os02g13530.1	P	GO:0006412	translation
LOC_Os02g13530.1	P	GO:0006139	nucleobase-containing compound metabolic process
LOC_Os02g13530.1	C	GO:0005840	ribosome
LOC_Os02g55060.1	C	GO:0005829	cytosol
LOC_Os02g55060.1	F	GO:0005488	binding
LOC_Os03g19410.1	C	GO:0009536	plastid
LOC_Os03g19410.1	P	GO:0019538	protein metabolic process
LOC_Os03g19410.1	F	GO:0016787	hydrolase activity
LOC_Os03g59060.2	F	GO:0016787	hydrolase activity
LOC_Os03g59060.2	P	GO:0006464	cellular protein modification process
LOC_Os03g59060.2	C	GO:0005829	cytosol
LOC_Os03g59060.2	C	GO:0005730	nucleolus
LOC_Os06g07630.1	F	GO:0016787	hydrolase activity
LOC_Os06g07630.1	F	GO:0005515	protein binding
LOC_Os06g07630.1	P	GO:0006139	nucleobase-containing compound metabolic process
LOC_Os06g07630.1	C	GO:0005829	cytosol
LOC_Os06g07630.1	P	GO:0009056	catabolic process
LOC_Os06g07630.1	P	GO:0019538	protein metabolic process
LOC_Os06g07630.1	P	GO:0007275	multicellular organismal development
LOC_Os06g07630.1	C	GO:0005634	nucleus
LOC_Os08g25734.2	C	GO:0009536	plastid
LOC_Os08g25734.2	P	GO:0009987	cellular process
LOC_Os08g25734.2	P	GO:0005975	carbohydrate metabolic process
LOC_Os08g25734.2	P	GO:0009058	biosynthetic process
LOC_Os08g25734.2	P	GO:0009628	response to abiotic stimulus
LOC_Os08g25734.2	P	GO:0009791	post-embryonic development
LOC_Os08g25734.2	P	GO:0000003	reproduction
LOC_Os08g25734.2	F	GO:0016740	transferase activity
LOC_Os08g25734.2	C	GO:0005576	extracellular region
LOC_Os12g25710.2	F	GO:0003824	catalytic activity
LOC_Os12g25710.2	C	GO:0005829	cytosol
LOC_Os12g25710.2	F	GO:0005515	protein binding
LOC_Os12g25710.2	F	GO:0000166	nucleotide binding
LOC_Os12g25710.2	C	GO:0016020	membrane
LOC_Os12g25710.2	P	GO:0006412	translation
LOC_Os12g25710.2	P	GO:0006139	nucleobase-containing compound metabolic process
LOC_Os02g05030.1	C	GO:0005829	cytosol
LOC_Os02g05030.1	C	GO:0005634	nucleus
LOC_Os02g05030.1	P	GO:0009987	cellular process
LOC_Os02g05030.1	P	GO:0005975	carbohydrate metabolic process
LOC_Os02g05030.1	P	GO:0009058	biosynthetic process
LOC_Os02g05030.1	F	GO:0016787	hydrolase activity
LOC_Os02g05030.1	F	GO:0005488	binding
LOC_Os02g43670.1	F	GO:0016740	transferase activity
LOC_Os02g43670.1	P	GO:0008152	metabolic process
LOC_Os02g43670.1	C	GO:0005575	cellular_component
LOC_Os03g18130.1	P	GO:0009628	response to abiotic stimulus
LOC_Os03g18130.1	P	GO:0006950	response to stress
LOC_Os03g18130.1	C	GO:0005829	cytosol
LOC_Os03g18130.1	P	GO:0009987	cellular process
LOC_Os03g18130.1	P	GO:0009058	biosynthetic process
LOC_Os03g18130.1	F	GO:0003824	catalytic activity
LOC_Os03g27120.1	P	GO:0008219	cell death
LOC_Os03g27120.1	F	GO:0016787	hydrolase activity
LOC_Os03g27120.1	P	GO:0019538	protein metabolic process
LOC_Os04g52164.1	F	GO:0016740	transferase activity
LOC_Os04g52164.1	P	GO:0008152	metabolic process
LOC_Os04g52164.1	C	GO:0009579	thylakoid
LOC_Os04g52164.1	C	GO:0009536	plastid
LOC_Os04g52164.1	C	GO:0016020	membrane
LOC_Os05g09440.1	P	GO:0016043	cellular component organization
LOC_Os05g09440.1	C	GO:0005829	cytosol
LOC_Os05g09440.1	P	GO:0006464	cellular protein modification process
LOC_Os05g09440.1	P	GO:0009058	biosynthetic process
LOC_Os05g09440.1	F	GO:0003824	catalytic activity
LOC_Os06g40560.1	C	GO:0005886	plasma membrane
LOC_Os06g40560.1	P	GO:0006139	nucleobase-containing compound metabolic process
LOC_Os06g40560.1	F	GO:0016787	hydrolase activity
LOC_Os06g40560.1	C	GO:0005730	nucleolus
LOC_Os06g40560.1	C	GO:0005618	cell wall
LOC_Os06g40560.1	P	GO:0009056	catabolic process
LOC_Os06g40560.1	P	GO:0019538	protein metabolic process
LOC_Os06g40560.1	F	GO:0000166	nucleotide binding
LOC_Os07g31280.1	F	GO:0030234	enzyme regulator activity
LOC_Os07g31280.1	F	GO:0016301	kinase activity
LOC_Os07g31280.1	F	GO:0005515	protein binding
LOC_Os07g31280.1	C	GO:0005622	intracellular
LOC_Os07g31280.1	P	GO:0006464	cellular protein modification process
LOC_Os08g41390.2	P	GO:0006464	cellular protein modification process
LOC_Os08g41390.2	C	GO:0005829	cytosol
LOC_Os08g41390.2	F	GO:0005515	protein binding
LOC_Os08g41390.2	P	GO:0009628	response to abiotic stimulus
LOC_Os08g41390.2	C	GO:0005634	nucleus
LOC_Os08g41390.2	F	GO:0003824	catalytic activity
LOC_Os08g41390.2	C	GO:0016020	membrane
LOC_Os08g41390.2	P	GO:0006950	response to stress
LOC_Os12g37650.1	P	GO:0008150	biological_process
LOC_Os12g37650.1	F	GO:0005515	protein binding
LOC_Os12g37650.1	C	GO:0005576	extracellular region
LOC_Os01g32800.2	C	GO:0005829	cytosol
LOC_Os01g32800.2	P	GO:0009987	cellular process
LOC_Os01g32800.2	P	GO:0009056	catabolic process
LOC_Os01g32800.2	P	GO:0019538	protein metabolic process
LOC_Os01g32800.2	C	GO:0005634	nucleus
LOC_Os01g32800.2	F	GO:0003674	molecular_function
LOC_Os01g46926.2	F	GO:0003824	catalytic activity
LOC_Os01g46926.2	P	GO:0006464	cellular protein modification process
LOC_Os01g46926.2	F	GO:0005515	protein binding
LOC_Os01g46926.2	P	GO:0009056	catabolic process
LOC_Os01g46926.2	C	GO:0005575	cellular_component
LOC_Os01g52390.1	C	GO:0005737	cytoplasm
LOC_Os01g52390.1	P	GO:0008150	biological_process
LOC_Os01g52390.1	C	GO:0005634	nucleus
LOC_Os01g52390.1	F	GO:0003723	RNA binding
LOC_Os03g18300.1	P	GO:0008150	biological_process
LOC_Os03g18300.1	C	GO:0009536	plastid
LOC_Os03g18300.1	F	GO:0003674	molecular_function
LOC_Os03g49380.1	C	GO:0009536	plastid
LOC_Os03g49380.1	P	GO:0008152	metabolic process
LOC_Os03g49380.1	F	GO:0005488	binding
LOC_Os03g49380.1	P	GO:0009791	post-embryonic development
LOC_Os03g49380.1	F	GO:0003824	catalytic activity
LOC_Os03g63480.1	C	GO:0009536	plastid
LOC_Os03g63480.1	C	GO:0016020	membrane
LOC_Os03g63480.1	P	GO:0009607	response to biotic stimulus
LOC_Os03g63480.1	P	GO:0006950	response to stress
LOC_Os03g63480.1	P	GO:0009791	post-embryonic development
LOC_Os03g63480.1	P	GO:0000003	reproduction
LOC_Os03g63480.1	P	GO:0006810	transport
LOC_Os03g63480.1	C	GO:0005634	nucleus
LOC_Os03g63480.1	P	GO:0009987	cellular process
LOC_Os03g63480.1	P	GO:0019538	protein metabolic process
LOC_Os04g01250.2	C	GO:0005886	plasma membrane
LOC_Os04g01250.2	C	GO:0005773	vacuole
LOC_Os04g01250.2	P	GO:0009607	response to biotic stimulus
LOC_Os04g01250.2	P	GO:0006950	response to stress
LOC_Os04g01250.2	P	GO:0008152	metabolic process
LOC_Os04g01250.2	C	GO:0005783	endoplasmic reticulum
LOC_Os04g01250.2	F	GO:0016787	hydrolase activity
LOC_Os04g23890.3	P	GO:0009606	tropism
LOC_Os04g23890.3	F	GO:0000166	nucleotide binding
LOC_Os04g23890.3	C	GO:0005794	Golgi apparatus
LOC_Os04g23890.3	P	GO:0006810	transport
LOC_Os04g23890.3	P	GO:0006464	cellular protein modification process
LOC_Os04g23890.3	F	GO:0005515	protein binding
LOC_Os04g23890.3	F	GO:0016301	kinase activity
LOC_Os04g23890.3	C	GO:0005886	plasma membrane
LOC_Os04g23890.3	P	GO:0007165	signal transduction
LOC_Os04g23890.3	P	GO:0016043	cellular component organization
LOC_Os04g23890.3	P	GO:0009628	response to abiotic stimulus
LOC_Os04g23890.3	F	GO:0004871	signal transducer activity
LOC_Os04g23890.3	F	GO:0004872	receptor activity
LOC_Os05g31750.1	C	GO:0005623	cell
LOC_Os05g31750.1	P	GO:0009719	response to endogenous stimulus
LOC_Os05g31750.1	P	GO:0009628	response to abiotic stimulus
LOC_Os05g31750.1	P	GO:0006950	response to stress
LOC_Os05g31750.1	F	GO:0008289	lipid binding
LOC_Os05g33570.2	C	GO:0009536	plastid
LOC_Os05g33570.2	C	GO:0005829	cytosol
LOC_Os05g33570.2	F	GO:0016301	kinase activity
LOC_Os05g33570.2	C	GO:0005634	nucleus
LOC_Os05g33570.2	P	GO:0009987	cellular process
LOC_Os05g33570.2	P	GO:0008152	metabolic process
LOC_Os05g34270.1	P	GO:0006950	response to stress
LOC_Os05g34270.1	C	GO:0005886	plasma membrane
LOC_Os05g34270.1	P	GO:0006464	cellular protein modification process
LOC_Os05g34270.1	F	GO:0016301	kinase activity
LOC_Os05g34270.1	F	GO:0005102	receptor binding
LOC_Os06g30970.1	F	GO:0003824	catalytic activity
LOC_Os06g30970.1	C	GO:0005886	plasma membrane
LOC_Os06g30970.1	P	GO:0006464	cellular protein modification process
LOC_Os06g30970.1	P	GO:0009056	catabolic process
LOC_Os10g41960.1	C	GO:0005829	cytosol
LOC_Os10g41960.1	C	GO:0005634	nucleus
LOC_Os10g41960.1	F	GO:0008135	translation factor activity, nucleic acid binding
LOC_Os10g41960.1	P	GO:0006412	translation
LOC_Os11g26910.1	F	GO:0003824	catalytic activity
LOC_Os11g26910.1	P	GO:0009790	embryo development
LOC_Os11g26910.1	P	GO:0009791	post-embryonic development
LOC_Os11g26910.1	P	GO:0000003	reproduction
LOC_Os11g26910.1	C	GO:0005737	cytoplasm
LOC_Os11g26910.1	P	GO:0006464	cellular protein modification process
LOC_Os11g26910.1	F	GO:0005515	protein binding
LOC_Os11g26910.1	P	GO:0009056	catabolic process
LOC_Os06g04290.1	F	GO:0005198	structural molecule activity
LOC_Os06g04290.1	C	GO:0005840	ribosome
LOC_Os06g04290.1	P	GO:0006412	translation
LOC_Os06g04290.1	C	GO:0005829	cytosol
LOC_Os06g04290.1	F	GO:0003723	RNA binding
LOC_Os03g14530.1	F	GO:0005198	structural molecule activity
LOC_Os03g14530.1	C	GO:0005840	ribosome
LOC_Os03g14530.1	P	GO:0006412	translation
LOC_Os03g14530.1	C	GO:0005829	cytosol
LOC_Os03g14530.1	F	GO:0003723	RNA binding
LOC_Os02g09060.1	P	GO:0009791	post-embryonic development
LOC_Os02g09060.1	F	GO:0003824	catalytic activity
LOC_Os02g09060.1	P	GO:0006464	cellular protein modification process
LOC_Os02g09060.1	C	GO:0005622	intracellular
LOC_Os02g09060.1	F	GO:0005515	protein binding
LOC_Os02g41860.3	F	GO:0005215	transporter activity
LOC_Os02g41860.3	P	GO:0009719	response to endogenous stimulus
LOC_Os02g41860.3	P	GO:0016049	cell growth
LOC_Os02g41860.3	P	GO:0007275	multicellular organismal development
LOC_Os02g41860.3	P	GO:0030154	cell differentiation
LOC_Os02g41860.3	P	GO:0009653	anatomical structure morphogenesis
LOC_Os02g41860.3	C	GO:0016020	membrane
LOC_Os02g41860.3	P	GO:0006810	transport
LOC_Os04g33780.1	F	GO:0016787	hydrolase activity
LOC_Os04g33780.1	P	GO:0006464	cellular protein modification process
LOC_Os04g33780.1	P	GO:0016043	cellular component organization
LOC_Os04g33780.1	F	GO:0005515	protein binding
LOC_Os04g33780.1	P	GO:0006139	nucleobase-containing compound metabolic process
LOC_Os04g33780.1	P	GO:0009058	biosynthetic process
LOC_Os04g33780.1	F	GO:0003682	chromatin binding
LOC_Os10g08930.1	F	GO:0005198	structural molecule activity
LOC_Os10g08930.1	C	GO:0005840	ribosome
LOC_Os10g08930.1	P	GO:0006412	translation
LOC_Os10g08930.1	C	GO:0005829	cytosol
LOC_Os10g08930.1	F	GO:0003723	RNA binding
LOC_Os03g09250.1	P	GO:0009790	embryo development
LOC_Os03g09250.1	P	GO:0009791	post-embryonic development
LOC_Os03g09250.1	P	GO:0000003	reproduction
LOC_Os03g09250.1	P	GO:0007154	cell communication
LOC_Os03g09250.1	P	GO:0009991	response to extracellular stimulus
LOC_Os03g09250.1	P	GO:0009628	response to abiotic stimulus
LOC_Os03g09250.1	F	GO:0003824	catalytic activity
LOC_Os03g09250.1	F	GO:0005515	protein binding
LOC_Os03g09250.1	P	GO:0006629	lipid metabolic process
LOC_Os03g09250.1	P	GO:0005975	carbohydrate metabolic process
LOC_Os03g09250.1	P	GO:0009058	biosynthetic process
LOC_Os03g09250.1	C	GO:0005737	cytoplasm
LOC_Os03g09250.1	P	GO:0009607	response to biotic stimulus
LOC_Os03g09250.1	P	GO:0006950	response to stress
LOC_Os03g09250.1	P	GO:0009719	response to endogenous stimulus
LOC_Os07g45300.1	F	GO:0005215	transporter activity
LOC_Os07g45300.1	C	GO:0005739	mitochondrion
LOC_Os07g45300.1	C	GO:0016020	membrane
LOC_Os07g45300.1	P	GO:0009987	cellular process
LOC_Os07g45300.1	P	GO:0006810	transport
LOC_Os12g06610.1	P	GO:0009908	flower development
LOC_Os12g06610.1	C	GO:0005634	nucleus
LOC_Os01g62244.2	F	GO:0003824	catalytic activity
LOC_Os01g62244.2	C	GO:0005622	intracellular
LOC_Os01g62244.2	P	GO:0006464	cellular protein modification process
LOC_Os01g62244.2	P	GO:0009056	catabolic process
LOC_Os02g06890.1	C	GO:0005829	cytosol
LOC_Os02g06890.1	F	GO:0016787	hydrolase activity
LOC_Os02g06890.1	P	GO:0008152	metabolic process
LOC_Os03g54050.2	F	GO:0005488	binding
LOC_Os03g54050.2	C	GO:0005575	cellular_component
LOC_Os03g54050.2	P	GO:0009607	response to biotic stimulus
LOC_Os03g54050.2	P	GO:0006950	response to stress
LOC_Os04g50204.1	C	GO:0009536	plastid
LOC_Os09g33820.3	P	GO:0006629	lipid metabolic process
LOC_Os09g33820.3	F	GO:0016740	transferase activity
LOC_Os09g33820.3	C	GO:0005575	cellular_component
LOC_Os10g33070.1	C	GO:0009536	plastid
LOC_Os10g33070.1	F	GO:0016787	hydrolase activity
LOC_Os10g33070.1	P	GO:0009719	response to endogenous stimulus
LOC_Os10g33070.1	F	GO:0016740	transferase activity
LOC_Os10g33070.1	P	GO:0009628	response to abiotic stimulus
LOC_Os10g33070.1	P	GO:0006950	response to stress
LOC_Os10g33070.1	P	GO:0009987	cellular process
LOC_Os10g33070.1	P	GO:0005975	carbohydrate metabolic process
LOC_Os10g33070.1	P	GO:0009058	biosynthetic process
LOC_Os12g06510.1	P	GO:0008150	biological_process
LOC_Os12g06510.1	F	GO:0005515	protein binding
LOC_Os12g06510.1	C	GO:0005773	vacuole
LOC_Os12g06510.1	C	GO:0016020	membrane
LOC_Os01g72800.1	P	GO:0016043	cellular component organization
LOC_Os01g72800.1	F	GO:0016787	hydrolase activity
LOC_Os01g72800.1	F	GO:0000166	nucleotide binding
LOC_Os01g72800.1	F	GO:0005515	protein binding
LOC_Os01g72800.1	C	GO:0009536	plastid
LOC_Os01g72800.1	C	GO:0009579	thylakoid
LOC_Os01g72800.1	P	GO:0006810	transport
LOC_Os01g72800.1	P	GO:0015979	photosynthesis
LOC_Os01g72800.1	P	GO:0006091	generation of precursor metabolites and energy
LOC_Os02g10510.1	F	GO:0016787	hydrolase activity
LOC_Os02g10510.1	C	GO:0005829	cytosol
LOC_Os02g10510.1	P	GO:0008152	metabolic process
LOC_Os02g10510.1	C	GO:0005634	nucleus
LOC_Os04g40630.1	F	GO:0005515	protein binding
LOC_Os04g40630.1	C	GO:0005737	cytoplasm
LOC_Os04g40630.1	P	GO:0006950	response to stress
LOC_Os04g40630.1	P	GO:0006139	nucleobase-containing compound metabolic process
LOC_Os04g40630.1	P	GO:0009058	biosynthetic process
LOC_Os04g40630.1	P	GO:0007275	multicellular organismal development
LOC_Os04g40630.1	C	GO:0005634	nucleus
LOC_Os04g40630.1	P	GO:0009719	response to endogenous stimulus
LOC_Os04g42600.2	C	GO:0005829	cytosol
LOC_Os04g42600.2	F	GO:0008135	translation factor activity, nucleic acid binding
LOC_Os04g42600.2	P	GO:0006412	translation
LOC_Os05g46560.2	C	GO:0009536	plastid
LOC_Os05g46560.2	P	GO:0009056	catabolic process
LOC_Os05g46560.2	P	GO:0006139	nucleobase-containing compound metabolic process
LOC_Os05g46560.2	P	GO:0007165	signal transduction
LOC_Os05g46560.2	P	GO:0009628	response to abiotic stimulus
LOC_Os05g46560.2	P	GO:0006950	response to stress
LOC_Os05g46560.2	P	GO:0006810	transport
LOC_Os05g46560.2	C	GO:0005773	vacuole
LOC_Os05g46560.2	C	GO:0016020	membrane
LOC_Os05g46560.2	F	GO:0030234	enzyme regulator activity
LOC_Os05g46560.2	C	GO:0005635	nuclear envelope
LOC_Os05g46560.2	C	GO:0005783	endoplasmic reticulum
LOC_Os06g51510.1	C	GO:0005886	plasma membrane
LOC_Os06g51510.1	F	GO:0005198	structural molecule activity
LOC_Os06g51510.1	C	GO:0005829	cytosol
LOC_Os06g51510.1	P	GO:0009987	cellular process
LOC_Os06g51510.1	P	GO:0006810	transport
LOC_Os08g09240.1	F	GO:0005515	protein binding
LOC_Os08g09240.1	P	GO:0009987	cellular process
LOC_Os08g09240.1	P	GO:0009056	catabolic process
LOC_Os08g15230.1	F	GO:0003674	molecular_function
LOC_Os08g15230.1	P	GO:0008150	biological_process
LOC_Os01g42480.2	P	GO:0008150	biological_process
LOC_Os01g42480.2	F	GO:0003674	molecular_function
LOC_Os01g52790.1	F	GO:0019825	oxygen binding
LOC_Os01g52790.1	P	GO:0008152	metabolic process
LOC_Os01g52790.1	F	GO:0003824	catalytic activity
LOC_Os01g52790.1	C	GO:0005623	cell
LOC_Os02g07930.1	F	GO:0003700	sequence-specific DNA binding transcription factor activity
LOC_Os02g07930.1	P	GO:0009628	response to abiotic stimulus
LOC_Os02g07930.1	P	GO:0009791	post-embryonic development
LOC_Os02g07930.1	P	GO:0006139	nucleobase-containing compound metabolic process
LOC_Os02g07930.1	P	GO:0009058	biosynthetic process
LOC_Os02g07930.1	F	GO:0005515	protein binding
LOC_Os02g38840.2	F	GO:0003824	catalytic activity
LOC_Os02g38840.2	P	GO:0009056	catabolic process
LOC_Os02g38840.2	P	GO:0006139	nucleobase-containing compound metabolic process
LOC_Os02g38840.2	C	GO:0005829	cytosol
LOC_Os02g38840.2	P	GO:0005975	carbohydrate metabolic process
LOC_Os02g43760.1	F	GO:0016787	hydrolase activity
LOC_Os02g43760.1	C	GO:0005829	cytosol
LOC_Os02g43760.1	P	GO:0009987	cellular process
LOC_Os02g43760.1	P	GO:0009056	catabolic process
LOC_Os02g43760.1	P	GO:0019538	protein metabolic process
LOC_Os02g50790.2	C	GO:0009536	plastid
LOC_Os02g50790.2	C	GO:0005829	cytosol
LOC_Os02g50790.2	F	GO:0005515	protein binding
LOC_Os02g50790.2	C	GO:0005730	nucleolus
LOC_Os02g50790.2	P	GO:0006810	transport
LOC_Os02g50790.2	P	GO:0006464	cellular protein modification process
LOC_Os02g50790.2	P	GO:0009908	flower development
LOC_Os02g50790.2	C	GO:0005635	nuclear envelope
LOC_Os03g07350.1	P	GO:0009607	response to biotic stimulus
LOC_Os03g07350.1	P	GO:0008152	metabolic process
LOC_Os03g07350.1	F	GO:0016740	transferase activity
LOC_Os03g07480.3	C	GO:0005886	plasma membrane
LOC_Os03g07480.3	F	GO:0005215	transporter activity
LOC_Os03g07480.3	P	GO:0009987	cellular process
LOC_Os03g07480.3	P	GO:0006810	transport
LOC_Os03g07480.3	P	GO:0006950	response to stress
LOC_Os03g31400.1	P	GO:0006464	cellular protein modification process
LOC_Os03g31400.1	C	GO:0005829	cytosol
LOC_Os03g31400.1	P	GO:0009056	catabolic process
LOC_Os03g31400.1	F	GO:0003824	catalytic activity
LOC_Os03g50450.1	C	GO:0005886	plasma membrane
LOC_Os03g50450.1	P	GO:0006464	cellular protein modification process
LOC_Os03g50450.1	F	GO:0000166	nucleotide binding
LOC_Os03g50450.1	F	GO:0005515	protein binding
LOC_Os03g50450.1	F	GO:0016301	kinase activity
LOC_Os03g50450.1	P	GO:0007165	signal transduction
LOC_Os03g50450.1	C	GO:0005773	vacuole
LOC_Os04g41470.1	F	GO:0003824	catalytic activity
LOC_Os04g41470.1	P	GO:0006464	cellular protein modification process
LOC_Os04g47310.1	P	GO:0008150	biological_process
LOC_Os04g47310.1	C	GO:0005575	cellular_component
LOC_Os04g47310.1	F	GO:0003674	molecular_function
LOC_Os04g53240.1	F	GO:0005515	protein binding
LOC_Os04g53240.1	P	GO:0009987	cellular process
LOC_Os04g53240.1	P	GO:0009056	catabolic process
LOC_Os04g55480.1	P	GO:0009791	post-embryonic development
LOC_Os04g55480.1	F	GO:0003824	catalytic activity
LOC_Os04g55480.1	P	GO:0006464	cellular protein modification process
LOC_Os04g55480.1	F	GO:0005515	protein binding
LOC_Os04g55480.1	C	GO:0005622	intracellular
LOC_Os05g28290.1	P	GO:0009987	cellular process
LOC_Os05g28290.1	P	GO:0006810	transport
LOC_Os05g28290.1	F	GO:0005515	protein binding
LOC_Os05g28290.1	C	GO:0005575	cellular_component
LOC_Os05g44770.1	C	GO:0005886	plasma membrane
LOC_Os05g44770.1	P	GO:0006464	cellular protein modification process
LOC_Os05g44770.1	F	GO:0016301	kinase activity
LOC_Os06g17440.1	P	GO:0009607	response to biotic stimulus
LOC_Os06g17440.1	C	GO:0005856	cytoskeleton
LOC_Os06g17440.1	F	GO:0005515	protein binding
LOC_Os06g17440.1	P	GO:0009628	response to abiotic stimulus
LOC_Os06g17440.1	P	GO:0006950	response to stress
LOC_Os06g17440.1	P	GO:0007275	multicellular organismal development
LOC_Os06g17440.1	P	GO:0016043	cellular component organization
LOC_Os06g17440.1	P	GO:0009987	cellular process
LOC_Os06g17440.1	P	GO:0006810	transport
LOC_Os07g35310.1	C	GO:0005886	plasma membrane
LOC_Os07g35310.1	P	GO:0006464	cellular protein modification process
LOC_Os07g35310.1	F	GO:0000166	nucleotide binding
LOC_Os07g35310.1	F	GO:0005515	protein binding
LOC_Os07g35310.1	F	GO:0016301	kinase activity
LOC_Os07g38840.2	P	GO:0006464	cellular protein modification process
LOC_Os07g38840.2	P	GO:0009058	biosynthetic process
LOC_Os07g38840.2	C	GO:0005575	cellular_component
LOC_Os07g38840.2	F	GO:0003674	molecular_function
LOC_Os08g13060.1	P	GO:0007154	cell communication
LOC_Os08g13060.1	P	GO:0009991	response to extracellular stimulus
LOC_Os08g13060.1	P	GO:0009628	response to abiotic stimulus
LOC_Os08g13060.1	P	GO:0006950	response to stress
LOC_Os08g13060.1	F	GO:0005515	protein binding
LOC_Os08g13060.1	C	GO:0005634	nucleus
LOC_Os10g27174.1	F	GO:0005198	structural molecule activity
LOC_Os10g27174.1	P	GO:0006412	translation
LOC_Os10g27174.1	C	GO:0005829	cytosol
LOC_Os10g27174.1	C	GO:0005618	cell wall
LOC_Os10g27174.1	P	GO:0006810	transport
LOC_Os10g27174.1	C	GO:0005840	ribosome
LOC_Os10g34040.1	C	GO:0005773	vacuole
LOC_Os10g34040.1	C	GO:0016020	membrane
LOC_Os10g34040.1	F	GO:0003674	molecular_function
LOC_Os10g34040.1	P	GO:0009987	cellular process
LOC_Os10g34040.1	P	GO:0006950	response to stress
LOC_Os11g03270.1	F	GO:0016787	hydrolase activity
LOC_Os11g03270.1	P	GO:0006139	nucleobase-containing compound metabolic process
LOC_Os11g03270.1	P	GO:0009056	catabolic process
LOC_Os11g03270.1	C	GO:0005794	Golgi apparatus
LOC_Os11g03270.1	P	GO:0009856	pollination
LOC_Os11g04880.1	C	GO:0005575	cellular_component
LOC_Os11g04880.1	F	GO:0003674	molecular_function
LOC_Os12g40510.1	P	GO:0008150	biological_process
LOC_Os12g40510.1	F	GO:0005515	protein binding
LOC_Os12g40510.1	C	GO:0005773	vacuole
LOC_Os12g40510.1	C	GO:0016020	membrane
LOC_Os01g01080.2	P	GO:0006629	lipid metabolic process
LOC_Os01g01080.2	P	GO:0009056	catabolic process
LOC_Os01g01080.2	F	GO:0005488	binding
LOC_Os01g01080.2	P	GO:0009987	cellular process
LOC_Os01g01080.2	C	GO:0005783	endoplasmic reticulum
LOC_Os01g01080.2	C	GO:0016020	membrane
LOC_Os01g01080.2	F	GO:0003824	catalytic activity
LOC_Os01g06290.3	F	GO:0003676	nucleic acid binding
LOC_Os01g06290.3	P	GO:0016043	cellular component organization
LOC_Os01g06290.3	C	GO:0005654	nucleoplasm
LOC_Os01g06290.3	F	GO:0000166	nucleotide binding
LOC_Os01g06290.3	P	GO:0006139	nucleobase-containing compound metabolic process
LOC_Os01g12880.1	C	GO:0005886	plasma membrane
LOC_Os01g12880.1	F	GO:0005215	transporter activity
[truncated: 596 more rows]

## Sheet: BP
Level	GO ID	Term	Type	#Seqs	Rice Locus Name
2	GO:0000003	reproduction	biological_process	34	LOC_Os03g12150.1, LOC_Os09g30418.1, LOC_Os08g39140.1, LOC_Os03g53190.2, LOC_Os10g28230.1, LOC_Os03g06670.1, LOC_Os03g13970.2, LOC_Os12g06610.1, LOC_Os02g50790.2, LOC_Os03g47770.1, LOC_Os07g12110.1, LOC_Os08g05690.1, LOC_Os11g26850.2, LOC_Os08g03290.1, LOC_Os02g38920.1, LOC_Os03g17690.1, LOC_Os07g49400.1, LOC_Os12g43600.1, LOC_Os12g07010.1, LOC_Os09g07830.2, LOC_Os03g22120.3, LOC_Os01g08200.1, LOC…
2	GO:0008152	metabolic process	biological_process	290	LOC_Os02g32030.1, LOC_Os09g31019.1, LOC_Os09g31031.2, LOC_Os12g07010.1, LOC_Os01g01060.1, LOC_Os02g01560.1, LOC_Os03g38000.2, LOC_Os08g03640.1, LOC_Os03g59310.1, LOC_Os07g05580.1, LOC_Os03g18570.1, LOC_Os03g18580.1, LOC_Os01g73160.1, LOC_Os08g02340.1, LOC_Os03g55150.4, LOC_Os05g27940.1, LOC_Os02g27760.1, LOC_Os06g37440.1, LOC_Os04g32650.1, LOC_Os10g10244.1, LOC_Os10g27190.1, LOC_Os05g37330.1, LOC…
2	GO:0009987	cellular process	biological_process	295	LOC_Os03g12150.1, LOC_Os02g32030.1, LOC_Os09g31019.1, LOC_Os09g31031.2, LOC_Os12g07010.1, LOC_Os01g01060.1, LOC_Os02g01560.1, LOC_Os03g38000.2, LOC_Os08g03640.1, LOC_Os03g59310.1, LOC_Os07g05580.1, LOC_Os03g18570.1, LOC_Os03g18580.1, LOC_Os01g73160.1, LOC_Os08g02340.1, LOC_Os03g55150.4, LOC_Os05g27940.1, LOC_Os02g27760.1, LOC_Os06g37440.1, LOC_Os04g32650.1, LOC_Os10g10244.1, LOC_Os10g27190.1, LOC…
2	GO:0023052	signaling	biological_process	15	LOC_Os05g41210.1, LOC_Os01g07760.1, LOC_Os07g49330.3, LOC_Os10g18340.1, LOC_Os01g42294.1, LOC_Os03g12250.1, LOC_Os03g13970.2, LOC_Os04g23890.3, LOC_Os05g46560.2, LOC_Os03g50450.1, LOC_Os02g40240.1, LOC_Os05g32570.1, LOC_Os08g05690.1, LOC_Os09g33930.3, LOC_Os11g02610.1
2	GO:0032501	multicellular organismal process	biological_process	75	LOC_Os03g12150.1, LOC_Os09g30418.1, LOC_Os08g39140.1, LOC_Os03g53190.2, LOC_Os10g28230.1, LOC_Os03g06670.1, LOC_Os03g13970.2, LOC_Os12g06610.1, LOC_Os02g50790.2, LOC_Os03g47770.1, LOC_Os07g12110.1, LOC_Os08g05690.1, LOC_Os02g41630.2, LOC_Os09g38030.2, LOC_Os01g48280.1, LOC_Os03g40270.1, LOC_Os06g45120.2, LOC_Os02g02410.1, LOC_Os02g07870.1, LOC_Os05g25640.1, LOC_Os03g29190.1, LOC_Os08g06380.1, LOC…
2	GO:0032502	developmental process	biological_process	71	LOC_Os09g30418.1, LOC_Os08g39140.1, LOC_Os03g53190.2, LOC_Os10g28230.1, LOC_Os03g06670.1, LOC_Os03g13970.2, LOC_Os12g06610.1, LOC_Os02g50790.2, LOC_Os03g47770.1, LOC_Os07g12110.1, LOC_Os08g05690.1, LOC_Os02g41630.2, LOC_Os09g38030.2, LOC_Os01g48280.1, LOC_Os03g40270.1, LOC_Os06g45120.2, LOC_Os02g02410.1, LOC_Os02g07870.1, LOC_Os05g25640.1, LOC_Os03g29190.1, LOC_Os08g06380.1, LOC_Os06g43660.3, LOC…
2	GO:0040007	growth	biological_process	17	LOC_Os05g25640.1, LOC_Os05g32570.1, LOC_Os07g37750.1, LOC_Os11g06390.1, LOC_Os05g01600.1, LOC_Os10g36650.1, LOC_Os12g06660.1, LOC_Os01g64630.1, LOC_Os03g29190.1, LOC_Os01g08200.1, LOC_Os03g29240.1, LOC_Os03g13970.2, LOC_Os02g41860.3, LOC_Os02g47880.2, LOC_Os03g12030.1, LOC_Os04g30240.1, LOC_Os10g25780.3
2	GO:0044699	single-organism process	biological_process	96	LOC_Os03g12150.1, LOC_Os09g30418.1, LOC_Os08g39140.1, LOC_Os03g53190.2, LOC_Os10g28230.1, LOC_Os03g06670.1, LOC_Os03g13970.2, LOC_Os12g06610.1, LOC_Os02g50790.2, LOC_Os03g47770.1, LOC_Os07g12110.1, LOC_Os08g05690.1, LOC_Os12g26290.5, LOC_Os03g27120.1, LOC_Os11g42040.1, LOC_Os02g41630.2, LOC_Os09g38030.2, LOC_Os01g48280.1, LOC_Os03g40270.1, LOC_Os06g45120.2, LOC_Os02g02410.1, LOC_Os02g07870.1, LOC…
2	GO:0050896	response to stimulus	biological_process	145	LOC_Os06g44080.1, LOC_Os10g08550.3, LOC_Os11g06390.1, LOC_Os05g01600.1, LOC_Os10g36650.1, LOC_Os12g06660.1, LOC_Os01g64630.1, LOC_Os01g64660.2, LOC_Os01g07760.1, LOC_Os01g49290.1, LOC_Os03g12500.1, LOC_Os03g61930.3, LOC_Os08g39850.1, LOC_Os10g18340.1, LOC_Os11g08300.1, LOC_Os11g32650.1, LOC_Os06g14370.3, LOC_Os04g57400.1, LOC_Os10g30790.2, LOC_Os03g13970.2, LOC_Os05g31750.1, LOC_Os02g41860.3, LOC…
2	GO:0051179	localization	biological_process	57	LOC_Os04g56160.1, LOC_Os11g01380.1, LOC_Os05g35460.1, LOC_Os06g45120.2, LOC_Os12g43600.1, LOC_Os06g37180.1, LOC_Os01g65880.1, LOC_Os07g26690.1, LOC_Os01g65380.1, LOC_Os02g07870.1, LOC_Os12g44150.1, LOC_Os10g10500.1, LOC_Os03g61930.3, LOC_Os08g06550.1, LOC_Os11g16590.1, LOC_Os11g32650.1, LOC_Os02g46962.3, LOC_Os02g44630.2, LOC_Os03g58840.1, LOC_Os10g42724.1, LOC_Os07g09340.1, LOC_Os05g49890.2, LOC…
2	GO:0051704	multi-organism process	biological_process	5	LOC_Os03g12150.1, LOC_Os03g29190.1, LOC_Os03g29240.1, LOC_Os11g03270.1, LOC_Os02g47880.2
2	GO:0065007	biological regulation	biological_process	17	LOC_Os11g26850.2, LOC_Os05g41210.1, LOC_Os01g07760.1, LOC_Os07g49330.3, LOC_Os10g18340.1, LOC_Os01g42294.1, LOC_Os03g12250.1, LOC_Os03g13970.2, LOC_Os04g23890.3, LOC_Os05g46560.2, LOC_Os03g50450.1, LOC_Os02g40240.1, LOC_Os05g32570.1, LOC_Os08g05690.1, LOC_Os09g33930.3, LOC_Os11g02610.1, LOC_Os07g08840.1
2	GO:0071840	cellular component organization or biogenesis	biological_process	51	LOC_Os11g26850.2, LOC_Os11g06390.1, LOC_Os05g01600.1, LOC_Os08g27840.1, LOC_Os03g50885.1, LOC_Os10g36650.1, LOC_Os12g06660.1, LOC_Os01g64630.1, LOC_Os09g14670.1, LOC_Os06g45120.2, LOC_Os05g49860.1, LOC_Os02g02410.1, LOC_Os08g38300.1, LOC_Os02g07870.1, LOC_Os05g38640.1, LOC_Os06g51220.2, LOC_Os01g55350.1, LOC_Os07g36140.1, LOC_Os12g25120.1, LOC_Os01g11054.2, LOC_Os03g27310.2, LOC_Os11g05730.1, LOC…
3	GO:0006807	nitrogen compound metabolic process	biological_process	76	LOC_Os12g43600.1, LOC_Os05g49860.1, LOC_Os08g38300.1, LOC_Os06g15360.1, LOC_Os05g38640.1, LOC_Os07g36140.1, LOC_Os12g25120.1, LOC_Os03g27310.2, LOC_Os11g05730.1, LOC_Os02g37920.1, LOC_Os06g07210.1, LOC_Os11g26850.2, LOC_Os09g30418.1, LOC_Os08g39140.1, LOC_Os04g56160.1, LOC_Os10g30580.1, LOC_Os03g05730.1, LOC_Os01g67860.1, LOC_Os01g22010.3, LOC_Os05g33380.1, LOC_Os05g04510.1, LOC_Os10g28200.1, LOC…
3	GO:0006950	response to stress	biological_process	111	LOC_Os01g45274.1, LOC_Os12g42876.1, LOC_Os04g40950.1, LOC_Os12g17600.1, LOC_Os12g42884.3, LOC_Os09g30418.1, LOC_Os08g39140.1, LOC_Os10g08550.3, LOC_Os08g03290.1, LOC_Os01g13210.2, LOC_Os02g38920.1, LOC_Os02g32030.1, LOC_Os11g06390.1, LOC_Os05g01600.1, LOC_Os11g47760.1, LOC_Os07g04840.1, LOC_Os08g27840.1, LOC_Os10g36650.1, LOC_Os02g41630.2, LOC_Os01g05490.1, LOC_Os03g16860.2, LOC_Os12g06660.1, LOC…
3	GO:0009056	catabolic process	biological_process	75	LOC_Os04g40950.1, LOC_Os05g06770.1, LOC_Os09g30418.1, LOC_Os08g39140.1, LOC_Os04g56160.1, LOC_Os10g30580.1, LOC_Os08g03290.1, LOC_Os02g38920.1, LOC_Os03g05730.1, LOC_Os08g27840.1, LOC_Os02g41630.2, LOC_Os01g05490.1, LOC_Os06g40640.1, LOC_Os01g67860.1, LOC_Os05g33380.1, LOC_Os02g14770.4, LOC_Os01g48280.1, LOC_Os03g17690.1, LOC_Os09g14670.1, LOC_Os07g49400.1, LOC_Os01g64660.2, LOC_Os11g01510.3, LOC…
3	GO:0009058	biosynthetic process	biological_process	117	LOC_Os02g32030.1, LOC_Os09g31019.1, LOC_Os09g31031.2, LOC_Os12g07010.1, LOC_Os01g01060.1, LOC_Os02g01560.1, LOC_Os03g38000.2, LOC_Os08g03640.1, LOC_Os03g59310.1, LOC_Os07g05580.1, LOC_Os03g18570.1, LOC_Os03g18580.1, LOC_Os01g73160.1, LOC_Os08g02340.1, LOC_Os03g55150.4, LOC_Os05g27940.1, LOC_Os02g27760.1, LOC_Os06g37440.1, LOC_Os04g32650.1, LOC_Os10g10244.1, LOC_Os10g27190.1, LOC_Os05g37330.1, LOC…
3	GO:0009605	response to external stimulus	biological_process	19	LOC_Os04g23890.3, LOC_Os01g15110.1, LOC_Os07g22640.1, LOC_Os08g05690.1, LOC_Os11g02610.1, LOC_Os03g53190.2, LOC_Os10g28230.1, LOC_Os03g06670.1, LOC_Os04g35570.1, LOC_Os03g29190.1, LOC_Os03g29240.1, LOC_Os08g27840.1, LOC_Os09g14670.1, LOC_Os01g55350.1, LOC_Os10g10500.1, LOC_Os01g11054.2, LOC_Os03g14690.1, LOC_Os03g09250.1, LOC_Os08g13060.1
3	GO:0009607	response to biotic stimulus	biological_process	33	LOC_Os01g45274.1, LOC_Os04g40950.1, LOC_Os09g30418.1, LOC_Os08g39140.1, LOC_Os01g13210.2, LOC_Os11g47760.1, LOC_Os07g04840.1, LOC_Os03g16860.2, LOC_Os02g18410.1, LOC_Os01g62290.1, LOC_Os03g60620.1, LOC_Os01g46610.1, LOC_Os11g01510.3, LOC_Os03g53190.2, LOC_Os10g28230.1, LOC_Os12g26290.5, LOC_Os03g06670.1, LOC_Os03g12500.1, LOC_Os04g39150.1, LOC_Os08g39850.1, LOC_Os10g18340.1, LOC_Os03g63480.1, LOC…
3	GO:0009628	response to abiotic stimulus	biological_process	94	LOC_Os01g45274.1, LOC_Os12g42876.1, LOC_Os12g17600.1, LOC_Os12g42884.3, LOC_Os09g30418.1, LOC_Os08g39140.1, LOC_Os10g08550.3, LOC_Os08g03290.1, LOC_Os01g13210.2, LOC_Os02g38920.1, LOC_Os02g32030.1, LOC_Os11g06390.1, LOC_Os05g01600.1, LOC_Os11g47760.1, LOC_Os10g36650.1, LOC_Os02g41630.2, LOC_Os01g05490.1, LOC_Os03g16860.2, LOC_Os12g06660.1, LOC_Os01g67860.1, LOC_Os02g18410.1, LOC_Os06g01500.1, LOC…
3	GO:0009719	response to endogenous stimulus	biological_process	33	LOC_Os06g44080.1, LOC_Os10g08550.3, LOC_Os11g06390.1, LOC_Os05g01600.1, LOC_Os10g36650.1, LOC_Os12g06660.1, LOC_Os01g64630.1, LOC_Os01g64660.2, LOC_Os01g07760.1, LOC_Os01g49290.1, LOC_Os03g12500.1, LOC_Os03g61930.3, LOC_Os08g39850.1, LOC_Os10g18340.1, LOC_Os11g08300.1, LOC_Os11g32650.1, LOC_Os06g14370.3, LOC_Os04g57400.1, LOC_Os10g30790.2, LOC_Os03g13970.2, LOC_Os05g31750.1, LOC_Os02g41860.3, LOC…
3	GO:0016043	cellular component organization	biological_process	51	LOC_Os11g26850.2, LOC_Os11g06390.1, LOC_Os05g01600.1, LOC_Os08g27840.1, LOC_Os03g50885.1, LOC_Os10g36650.1, LOC_Os12g06660.1, LOC_Os01g64630.1, LOC_Os09g14670.1, LOC_Os06g45120.2, LOC_Os05g49860.1, LOC_Os02g02410.1, LOC_Os08g38300.1, LOC_Os02g07870.1, LOC_Os05g38640.1, LOC_Os06g51220.2, LOC_Os01g55350.1, LOC_Os07g36140.1, LOC_Os12g25120.1, LOC_Os01g11054.2, LOC_Os03g27310.2, LOC_Os11g05730.1, LOC…
3	GO:0016265	death	biological_process	3	LOC_Os12g26290.5, LOC_Os03g27120.1, LOC_Os11g42040.1
3	GO:0022414	reproductive process	biological_process	16	LOC_Os03g12150.1, LOC_Os09g30418.1, LOC_Os08g39140.1, LOC_Os03g53190.2, LOC_Os10g28230.1, LOC_Os03g06670.1, LOC_Os03g13970.2, LOC_Os12g06610.1, LOC_Os02g50790.2, LOC_Os03g47770.1, LOC_Os07g12110.1, LOC_Os08g05690.1, LOC_Os03g29190.1, LOC_Os03g29240.1, LOC_Os11g03270.1, LOC_Os02g47880.2
3	GO:0044237	cellular metabolic process	biological_process	175	LOC_Os02g32030.1, LOC_Os09g31019.1, LOC_Os09g31031.2, LOC_Os12g07010.1, LOC_Os01g01060.1, LOC_Os02g01560.1, LOC_Os03g38000.2, LOC_Os08g03640.1, LOC_Os03g59310.1, LOC_Os07g05580.1, LOC_Os03g18570.1, LOC_Os03g18580.1, LOC_Os01g73160.1, LOC_Os08g02340.1, LOC_Os03g55150.4, LOC_Os05g27940.1, LOC_Os02g27760.1, LOC_Os06g37440.1, LOC_Os04g32650.1, LOC_Os10g10244.1, LOC_Os10g27190.1, LOC_Os05g37330.1, LOC…
3	GO:0044238	primary metabolic process	biological_process	215	LOC_Os02g32030.1, LOC_Os09g31019.1, LOC_Os09g31031.2, LOC_Os12g07010.1, LOC_Os01g01060.1, LOC_Os02g01560.1, LOC_Os03g38000.2, LOC_Os08g03640.1, LOC_Os03g59310.1, LOC_Os07g05580.1, LOC_Os03g18570.1, LOC_Os03g18580.1, LOC_Os01g73160.1, LOC_Os08g02340.1, LOC_Os03g55150.4, LOC_Os05g27940.1, LOC_Os02g27760.1, LOC_Os06g37440.1, LOC_Os04g32650.1, LOC_Os10g10244.1, LOC_Os10g27190.1, LOC_Os05g37330.1, LOC…
3	GO:0044700	single organism signaling	biological_process	15	LOC_Os05g41210.1, LOC_Os01g07760.1, LOC_Os07g49330.3, LOC_Os10g18340.1, LOC_Os01g42294.1, LOC_Os03g12250.1, LOC_Os03g13970.2, LOC_Os04g23890.3, LOC_Os05g46560.2, LOC_Os03g50450.1, LOC_Os02g40240.1, LOC_Os05g32570.1, LOC_Os08g05690.1, LOC_Os09g33930.3, LOC_Os11g02610.1
3	GO:0044706	multi-multicellular organism process	biological_process	5	LOC_Os03g12150.1, LOC_Os03g29190.1, LOC_Os03g29240.1, LOC_Os11g03270.1, LOC_Os02g47880.2
3	GO:0044707	single-multicellular organism process	biological_process	73	LOC_Os09g30418.1, LOC_Os08g39140.1, LOC_Os03g53190.2, LOC_Os10g28230.1, LOC_Os03g06670.1, LOC_Os03g13970.2, LOC_Os12g06610.1, LOC_Os02g50790.2, LOC_Os03g47770.1, LOC_Os07g12110.1, LOC_Os08g05690.1, LOC_Os02g41630.2, LOC_Os09g38030.2, LOC_Os01g48280.1, LOC_Os03g40270.1, LOC_Os06g45120.2, LOC_Os02g02410.1, LOC_Os02g07870.1, LOC_Os05g25640.1, LOC_Os03g29190.1, LOC_Os08g06380.1, LOC_Os06g43660.3, LOC…
3	GO:0044710	single-organism metabolic process	biological_process	30	LOC_Os02g41630.2, LOC_Os09g29200.1, LOC_Os08g38900.1, LOC_Os08g06100.1, LOC_Os11g32650.1, LOC_Os05g25640.1, LOC_Os02g03260.1, LOC_Os02g08100.1, LOC_Os02g09490.1, LOC_Os04g28520.1, LOC_Os07g34260.1, LOC_Os10g36848.1, LOC_Os01g07760.1, LOC_Os12g26290.5, LOC_Os07g49330.3, LOC_Os03g12500.1, LOC_Os08g39850.1, LOC_Os12g44310.2, LOC_Os02g04710.1, LOC_Os03g09250.1, LOC_Os09g33820.3, LOC_Os01g01080.2, LOC…
3	GO:0044763	single-organism cellular process	biological_process	47	LOC_Os03g12150.1, LOC_Os12g26290.5, LOC_Os03g27120.1, LOC_Os11g42040.1, LOC_Os05g41210.1, LOC_Os01g07760.1, LOC_Os07g49330.3, LOC_Os10g18340.1, LOC_Os01g42294.1, LOC_Os03g12250.1, LOC_Os03g13970.2, LOC_Os04g23890.3, LOC_Os05g46560.2, LOC_Os03g50450.1, LOC_Os02g40240.1, LOC_Os05g32570.1, LOC_Os08g05690.1, LOC_Os09g33930.3, LOC_Os11g02610.1, LOC_Os11g06390.1, LOC_Os05g01600.1, LOC_Os10g36650.1, LOC…
3	GO:0044767	single-organism developmental process	biological_process	22	LOC_Os09g30418.1, LOC_Os08g39140.1, LOC_Os03g53190.2, LOC_Os10g28230.1, LOC_Os03g06670.1, LOC_Os03g13970.2, LOC_Os12g06610.1, LOC_Os02g50790.2, LOC_Os03g47770.1, LOC_Os07g12110.1, LOC_Os08g05690.1, LOC_Os11g26850.2, LOC_Os06g44080.1, LOC_Os03g17690.1, LOC_Os07g49400.1, LOC_Os12g07010.1, LOC_Os09g07830.2, LOC_Os01g08200.1, LOC_Os11g26910.1, LOC_Os03g09250.1, LOC_Os09g10300.1, LOC_Os11g04890.1
3	GO:0048610	cellular process involved in reproduction	biological_process	1	LOC_Os03g12150.1
3	GO:0048856	anatomical structure development	biological_process	37	LOC_Os09g30418.1, LOC_Os08g39140.1, LOC_Os03g53190.2, LOC_Os10g28230.1, LOC_Os03g06670.1, LOC_Os03g13970.2, LOC_Os12g06610.1, LOC_Os02g50790.2, LOC_Os03g47770.1, LOC_Os07g12110.1, LOC_Os08g05690.1, LOC_Os11g06390.1, LOC_Os05g01600.1, LOC_Os10g36650.1, LOC_Os12g06660.1, LOC_Os01g64630.1, LOC_Os01g48280.1, LOC_Os03g29190.1, LOC_Os01g08200.1, LOC_Os03g29240.1, LOC_Os02g41860.3, LOC_Os01g15110.1, LOC…
3	GO:0050789	regulation of biological process	biological_process	16	LOC_Os11g26850.2, LOC_Os05g41210.1, LOC_Os01g07760.1, LOC_Os07g49330.3, LOC_Os10g18340.1, LOC_Os01g42294.1, LOC_Os03g12250.1, LOC_Os03g13970.2, LOC_Os04g23890.3, LOC_Os05g46560.2, LOC_Os03g50450.1, LOC_Os02g40240.1, LOC_Os05g32570.1, LOC_Os08g05690.1, LOC_Os09g33930.3, LOC_Os11g02610.1
3	GO:0051234	establishment of localization	biological_process	57	LOC_Os04g56160.1, LOC_Os11g01380.1, LOC_Os05g35460.1, LOC_Os06g45120.2, LOC_Os12g43600.1, LOC_Os06g37180.1, LOC_Os01g65880.1, LOC_Os07g26690.1, LOC_Os01g65380.1, LOC_Os02g07870.1, LOC_Os12g44150.1, LOC_Os10g10500.1, LOC_Os03g61930.3, LOC_Os08g06550.1, LOC_Os11g16590.1, LOC_Os11g32650.1, LOC_Os02g46962.3, LOC_Os02g44630.2, LOC_Os03g58840.1, LOC_Os10g42724.1, LOC_Os07g09340.1, LOC_Os05g49890.2, LOC…
3	GO:0065008	regulation of biological quality	biological_process	1	LOC_Os07g08840.1
3	GO:0071704	organic substance metabolic process	biological_process	215	LOC_Os02g32030.1, LOC_Os09g31019.1, LOC_Os09g31031.2, LOC_Os12g07010.1, LOC_Os01g01060.1, LOC_Os02g01560.1, LOC_Os03g38000.2, LOC_Os08g03640.1, LOC_Os03g59310.1, LOC_Os07g05580.1, LOC_Os03g18570.1, LOC_Os03g18580.1, LOC_Os01g73160.1, LOC_Os08g02340.1, LOC_Os03g55150.4, LOC_Os05g27940.1, LOC_Os02g27760.1, LOC_Os06g37440.1, LOC_Os04g32650.1, LOC_Os10g10244.1, LOC_Os10g27190.1, LOC_Os05g37330.1, LOC…
4	GO:0003006	developmental process involved in reproduction	biological_process	11	LOC_Os09g30418.1, LOC_Os08g39140.1, LOC_Os03g53190.2, LOC_Os10g28230.1, LOC_Os03g06670.1, LOC_Os03g13970.2, LOC_Os12g06610.1, LOC_Os02g50790.2, LOC_Os03g47770.1, LOC_Os07g12110.1, LOC_Os08g05690.1
4	GO:0005975	carbohydrate metabolic process	biological_process	29	LOC_Os03g28330.4, LOC_Os04g40950.1, LOC_Os06g09450.4, LOC_Os08g03290.1, LOC_Os02g38920.1, LOC_Os01g05490.1, LOC_Os08g02120.1, LOC_Os06g40640.1, LOC_Os01g67860.1, LOC_Os05g33380.1, LOC_Os03g40270.1, LOC_Os01g64660.2, LOC_Os08g09250.1, LOC_Os05g22970.1, LOC_Os08g02700.1, LOC_Os08g06380.1, LOC_Os01g27880.1, LOC_Os03g22120.3, LOC_Os02g03260.1, LOC_Os08g25734.2, LOC_Os02g05030.1, LOC_Os03g09250.1, LOC…
4	GO:0006091	generation of precursor metabolites and energy	biological_process	16	LOC_Os04g40950.1, LOC_Os08g03290.1, LOC_Os02g38920.1, LOC_Os07g04840.1, LOC_Os08g27840.1, LOC_Os01g05490.1, LOC_Os08g02120.1, LOC_Os06g40640.1, LOC_Os02g14770.4, LOC_Os09g14670.1, LOC_Os01g55350.1, LOC_Os01g11054.2, LOC_Os01g72800.1, LOC_Os06g05860.1, LOC_Os06g22060.1, LOC_Os07g46790.1
4	GO:0006629	lipid metabolic process	biological_process	19	LOC_Os01g07760.1, LOC_Os12g26290.5, LOC_Os07g49330.3, LOC_Os03g12500.1, LOC_Os08g39850.1, LOC_Os12g44310.2, LOC_Os02g04710.1, LOC_Os03g09250.1, LOC_Os09g33820.3, LOC_Os01g01080.2, LOC_Os01g46750.3, LOC_Os02g12680.1, LOC_Os02g37050.1, LOC_Os03g08360.4, LOC_Os03g12030.1, LOC_Os03g63580.1, LOC_Os04g28520.1, LOC_Os10g25780.3, LOC_Os12g07110.2
4	GO:0006725	cellular aromatic compound metabolic process	biological_process	76	LOC_Os12g43600.1, LOC_Os05g49860.1, LOC_Os08g38300.1, LOC_Os06g15360.1, LOC_Os05g38640.1, LOC_Os07g36140.1, LOC_Os12g25120.1, LOC_Os03g27310.2, LOC_Os11g05730.1, LOC_Os02g37920.1, LOC_Os06g07210.1, LOC_Os11g26850.2, LOC_Os09g30418.1, LOC_Os08g39140.1, LOC_Os04g56160.1, LOC_Os10g30580.1, LOC_Os03g05730.1, LOC_Os01g67860.1, LOC_Os01g22010.3, LOC_Os05g33380.1, LOC_Os05g04510.1, LOC_Os10g28200.1, LOC…
4	GO:0006810	transport	biological_process	57	LOC_Os04g56160.1, LOC_Os11g01380.1, LOC_Os05g35460.1, LOC_Os06g45120.2, LOC_Os12g43600.1, LOC_Os06g37180.1, LOC_Os01g65880.1, LOC_Os07g26690.1, LOC_Os01g65380.1, LOC_Os02g07870.1, LOC_Os12g44150.1, LOC_Os10g10500.1, LOC_Os03g61930.3, LOC_Os08g06550.1, LOC_Os11g16590.1, LOC_Os11g32650.1, LOC_Os02g46962.3, LOC_Os02g44630.2, LOC_Os03g58840.1, LOC_Os10g42724.1, LOC_Os07g09340.1, LOC_Os05g49890.2, LOC…
4	GO:0007049	cell cycle	biological_process	3	LOC_Os02g37920.1, LOC_Os03g15810.1, LOC_Os04g28520.1
4	GO:0007154	cell communication	biological_process	24	LOC_Os03g12150.1, LOC_Os05g41210.1, LOC_Os01g07760.1, LOC_Os07g49330.3, LOC_Os10g18340.1, LOC_Os01g42294.1, LOC_Os03g12250.1, LOC_Os03g13970.2, LOC_Os04g23890.3, LOC_Os05g46560.2, LOC_Os03g50450.1, LOC_Os02g40240.1, LOC_Os05g32570.1, LOC_Os08g05690.1, LOC_Os09g33930.3, LOC_Os11g02610.1, LOC_Os08g27840.1, LOC_Os09g14670.1, LOC_Os01g55350.1, LOC_Os10g10500.1, LOC_Os01g11054.2, LOC_Os03g14690.1, LOC…
4	GO:0007275	multicellular organismal development	biological_process	69	LOC_Os09g30418.1, LOC_Os08g39140.1, LOC_Os03g53190.2, LOC_Os10g28230.1, LOC_Os03g06670.1, LOC_Os03g13970.2, LOC_Os12g06610.1, LOC_Os02g50790.2, LOC_Os03g47770.1, LOC_Os07g12110.1, LOC_Os08g05690.1, LOC_Os02g41630.2, LOC_Os09g38030.2, LOC_Os01g48280.1, LOC_Os03g40270.1, LOC_Os06g45120.2, LOC_Os02g02410.1, LOC_Os02g07870.1, LOC_Os05g25640.1, LOC_Os03g29190.1, LOC_Os08g06380.1, LOC_Os06g43660.3, LOC…
4	GO:0008219	cell death	biological_process	3	LOC_Os12g26290.5, LOC_Os03g27120.1, LOC_Os11g42040.1
4	GO:0009606	tropism	biological_process	5	LOC_Os04g23890.3, LOC_Os01g15110.1, LOC_Os07g22640.1, LOC_Os08g05690.1, LOC_Os11g02610.1
4	GO:0009653	anatomical structure morphogenesis	biological_process	19	LOC_Os11g06390.1, LOC_Os05g01600.1, LOC_Os10g36650.1, LOC_Os12g06660.1, LOC_Os01g64630.1, LOC_Os01g48280.1, LOC_Os03g29190.1, LOC_Os01g08200.1, LOC_Os03g29240.1, LOC_Os03g13970.2, LOC_Os02g41860.3, LOC_Os01g15110.1, LOC_Os02g47880.2, LOC_Os03g12030.1, LOC_Os03g47770.1, LOC_Os04g30240.1, LOC_Os09g33930.3, LOC_Os10g25780.3, LOC_Os11g04890.1
4	GO:0009991	response to extracellular stimulus	biological_process	8	LOC_Os08g27840.1, LOC_Os09g14670.1, LOC_Os01g55350.1, LOC_Os10g10500.1, LOC_Os01g11054.2, LOC_Os03g14690.1, LOC_Os03g09250.1, LOC_Os08g13060.1
4	GO:0015979	photosynthesis	biological_process	4	LOC_Os07g04840.1, LOC_Os01g64660.2, LOC_Os01g72800.1, LOC_Os06g22060.1
4	GO:0016049	cell growth	biological_process	14	LOC_Os11g06390.1, LOC_Os05g01600.1, LOC_Os10g36650.1, LOC_Os12g06660.1, LOC_Os01g64630.1, LOC_Os03g29190.1, LOC_Os01g08200.1, LOC_Os03g29240.1, LOC_Os03g13970.2, LOC_Os02g41860.3, LOC_Os02g47880.2, LOC_Os03g12030.1, LOC_Os04g30240.1, LOC_Os10g25780.3
4	GO:0019222	regulation of metabolic process	biological_process	1	LOC_Os11g26850.2
4	GO:0019748	secondary metabolic process	biological_process	12	LOC_Os02g41630.2, LOC_Os09g29200.1, LOC_Os08g38900.1, LOC_Os08g06100.1, LOC_Os11g32650.1, LOC_Os05g25640.1, LOC_Os02g03260.1, LOC_Os02g08100.1, LOC_Os02g09490.1, LOC_Os04g28520.1, LOC_Os07g34260.1, LOC_Os10g36848.1
4	GO:0034641	cellular nitrogen compound metabolic process	biological_process	76	LOC_Os12g43600.1, LOC_Os05g49860.1, LOC_Os08g38300.1, LOC_Os06g15360.1, LOC_Os05g38640.1, LOC_Os07g36140.1, LOC_Os12g25120.1, LOC_Os03g27310.2, LOC_Os11g05730.1, LOC_Os02g37920.1, LOC_Os06g07210.1, LOC_Os11g26850.2, LOC_Os09g30418.1, LOC_Os08g39140.1, LOC_Os04g56160.1, LOC_Os10g30580.1, LOC_Os03g05730.1, LOC_Os01g67860.1, LOC_Os01g22010.3, LOC_Os05g33380.1, LOC_Os05g04510.1, LOC_Os10g28200.1, LOC…
4	GO:0042592	homeostatic process	biological_process	1	LOC_Os07g08840.1
4	GO:0043170	macromolecule metabolic process	biological_process	126	LOC_Os02g32030.1, LOC_Os09g31019.1, LOC_Os09g31031.2, LOC_Os12g07010.1, LOC_Os01g01060.1, LOC_Os02g01560.1, LOC_Os03g38000.2, LOC_Os08g03640.1, LOC_Os03g59310.1, LOC_Os07g05580.1, LOC_Os03g18570.1, LOC_Os03g18580.1, LOC_Os01g73160.1, LOC_Os08g02340.1, LOC_Os03g55150.4, LOC_Os05g27940.1, LOC_Os02g27760.1, LOC_Os06g37440.1, LOC_Os04g32650.1, LOC_Os10g10244.1, LOC_Os10g27190.1, LOC_Os05g37330.1, LOC…
4	GO:0044249	cellular biosynthetic process	biological_process	35	LOC_Os02g32030.1, LOC_Os09g31019.1, LOC_Os09g31031.2, LOC_Os12g07010.1, LOC_Os01g01060.1, LOC_Os02g01560.1, LOC_Os03g38000.2, LOC_Os08g03640.1, LOC_Os03g59310.1, LOC_Os07g05580.1, LOC_Os03g18570.1, LOC_Os03g18580.1, LOC_Os01g73160.1, LOC_Os08g02340.1, LOC_Os03g55150.4, LOC_Os05g27940.1, LOC_Os02g27760.1, LOC_Os06g37440.1, LOC_Os04g32650.1, LOC_Os10g10244.1, LOC_Os10g27190.1, LOC_Os05g37330.1, LOC…
4	GO:0044703	multi-organism reproductive process	biological_process	5	LOC_Os03g12150.1, LOC_Os03g29190.1, LOC_Os03g29240.1, LOC_Os11g03270.1, LOC_Os02g47880.2
4	GO:0046483	heterocycle metabolic process	biological_process	76	LOC_Os12g43600.1, LOC_Os05g49860.1, LOC_Os08g38300.1, LOC_Os06g15360.1, LOC_Os05g38640.1, LOC_Os07g36140.1, LOC_Os12g25120.1, LOC_Os03g27310.2, LOC_Os11g05730.1, LOC_Os02g37920.1, LOC_Os06g07210.1, LOC_Os11g26850.2, LOC_Os09g30418.1, LOC_Os08g39140.1, LOC_Os04g56160.1, LOC_Os10g30580.1, LOC_Os03g05730.1, LOC_Os01g67860.1, LOC_Os01g22010.3, LOC_Os05g33380.1, LOC_Os05g04510.1, LOC_Os10g28200.1, LOC…
4	GO:0048869	cellular developmental process	biological_process	14	LOC_Os11g06390.1, LOC_Os05g01600.1, LOC_Os10g36650.1, LOC_Os12g06660.1, LOC_Os01g64630.1, LOC_Os01g48280.1, LOC_Os02g02410.1, LOC_Os03g29190.1, LOC_Os01g08200.1, LOC_Os03g29240.1, LOC_Os03g13970.2, LOC_Os02g41860.3, LOC_Os02g47880.2, LOC_Os03g08360.4
4	GO:0050794	regulation of cellular process	biological_process	15	LOC_Os05g41210.1, LOC_Os01g07760.1, LOC_Os07g49330.3, LOC_Os10g18340.1, LOC_Os01g42294.1, LOC_Os03g12250.1, LOC_Os03g13970.2, LOC_Os04g23890.3, LOC_Os05g46560.2, LOC_Os03g50450.1, LOC_Os02g40240.1, LOC_Os05g32570.1, LOC_Os08g05690.1, LOC_Os09g33930.3, LOC_Os11g02610.1
4	GO:0051716	cellular response to stimulus	biological_process	15	LOC_Os05g41210.1, LOC_Os01g07760.1, LOC_Os07g49330.3, LOC_Os10g18340.1, LOC_Os01g42294.1, LOC_Os03g12250.1, LOC_Os03g13970.2, LOC_Os04g23890.3, LOC_Os05g46560.2, LOC_Os03g50450.1, LOC_Os02g40240.1, LOC_Os05g32570.1, LOC_Os08g05690.1, LOC_Os09g33930.3, LOC_Os11g02610.1
4	GO:1901360	organic cyclic compound metabolic process	biological_process	76	LOC_Os12g43600.1, LOC_Os05g49860.1, LOC_Os08g38300.1, LOC_Os06g15360.1, LOC_Os05g38640.1, LOC_Os07g36140.1, LOC_Os12g25120.1, LOC_Os03g27310.2, LOC_Os11g05730.1, LOC_Os02g37920.1, LOC_Os06g07210.1, LOC_Os11g26850.2, LOC_Os09g30418.1, LOC_Os08g39140.1, LOC_Os04g56160.1, LOC_Os10g30580.1, LOC_Os03g05730.1, LOC_Os01g67860.1, LOC_Os01g22010.3, LOC_Os05g33380.1, LOC_Os05g04510.1, LOC_Os10g28200.1, LOC…
4	GO:1901576	organic substance biosynthetic process	biological_process	35	LOC_Os02g32030.1, LOC_Os09g31019.1, LOC_Os09g31031.2, LOC_Os12g07010.1, LOC_Os01g01060.1, LOC_Os02g01560.1, LOC_Os03g38000.2, LOC_Os08g03640.1, LOC_Os03g59310.1, LOC_Os07g05580.1, LOC_Os03g18570.1, LOC_Os03g18580.1, LOC_Os01g73160.1, LOC_Os08g02340.1, LOC_Os03g55150.4, LOC_Os05g27940.1, LOC_Os02g27760.1, LOC_Os06g37440.1, LOC_Os04g32650.1, LOC_Os10g10244.1, LOC_Os10g27190.1, LOC_Os05g37330.1, LOC…
5	GO:0006139	nucleobase-containing compound metabolic process	biological_process	76	LOC_Os12g43600.1, LOC_Os05g49860.1, LOC_Os08g38300.1, LOC_Os06g15360.1, LOC_Os05g38640.1, LOC_Os07g36140.1, LOC_Os12g25120.1, LOC_Os03g27310.2, LOC_Os11g05730.1, LOC_Os02g37920.1, LOC_Os06g07210.1, LOC_Os11g26850.2, LOC_Os09g30418.1, LOC_Os08g39140.1, LOC_Os04g56160.1, LOC_Os10g30580.1, LOC_Os03g05730.1, LOC_Os01g67860.1, LOC_Os01g22010.3, LOC_Os05g33380.1, LOC_Os05g04510.1, LOC_Os10g28200.1, LOC…
5	GO:0007165	signal transduction	biological_process	15	LOC_Os05g41210.1, LOC_Os01g07760.1, LOC_Os07g49330.3, LOC_Os10g18340.1, LOC_Os01g42294.1, LOC_Os03g12250.1, LOC_Os03g13970.2, LOC_Os04g23890.3, LOC_Os05g46560.2, LOC_Os03g50450.1, LOC_Os02g40240.1, LOC_Os05g32570.1, LOC_Os08g05690.1, LOC_Os09g33930.3, LOC_Os11g02610.1
5	GO:0009059	macromolecule biosynthetic process	biological_process	35	LOC_Os02g32030.1, LOC_Os09g31019.1, LOC_Os09g31031.2, LOC_Os12g07010.1, LOC_Os01g01060.1, LOC_Os02g01560.1, LOC_Os03g38000.2, LOC_Os08g03640.1, LOC_Os03g59310.1, LOC_Os07g05580.1, LOC_Os03g18570.1, LOC_Os03g18580.1, LOC_Os01g73160.1, LOC_Os08g02340.1, LOC_Os03g55150.4, LOC_Os05g27940.1, LOC_Os02g27760.1, LOC_Os06g37440.1, LOC_Os04g32650.1, LOC_Os10g10244.1, LOC_Os10g27190.1, LOC_Os05g37330.1, LOC…
5	GO:0009790	embryo development	biological_process	11	LOC_Os11g26850.2, LOC_Os06g44080.1, LOC_Os03g17690.1, LOC_Os07g49400.1, LOC_Os12g07010.1, LOC_Os09g07830.2, LOC_Os01g08200.1, LOC_Os11g26910.1, LOC_Os03g09250.1, LOC_Os09g10300.1, LOC_Os11g04890.1
5	GO:0009791	post-embryonic development	biological_process	44	LOC_Os09g30418.1, LOC_Os08g39140.1, LOC_Os03g53190.2, LOC_Os10g28230.1, LOC_Os03g06670.1, LOC_Os03g13970.2, LOC_Os12g06610.1, LOC_Os02g50790.2, LOC_Os03g47770.1, LOC_Os07g12110.1, LOC_Os08g05690.1, LOC_Os11g26850.2, LOC_Os08g03290.1, LOC_Os02g38920.1, LOC_Os11g06390.1, LOC_Os05g01600.1, LOC_Os11g47760.1, LOC_Os10g36650.1, LOC_Os12g06660.1, LOC_Os01g64630.1, LOC_Os03g60620.1, LOC_Os03g17690.1, LOC…
5	GO:0009856	pollination	biological_process	5	LOC_Os03g12150.1, LOC_Os03g29190.1, LOC_Os03g29240.1, LOC_Os11g03270.1, LOC_Os02g47880.2
5	GO:0010467	gene expression	biological_process	36	LOC_Os02g32030.1, LOC_Os09g31019.1, LOC_Os09g31031.2, LOC_Os12g07010.1, LOC_Os01g01060.1, LOC_Os02g01560.1, LOC_Os03g38000.2, LOC_Os08g03640.1, LOC_Os03g59310.1, LOC_Os07g05580.1, LOC_Os03g18570.1, LOC_Os03g18580.1, LOC_Os01g73160.1, LOC_Os08g02340.1, LOC_Os03g55150.4, LOC_Os05g27940.1, LOC_Os02g27760.1, LOC_Os06g37440.1, LOC_Os04g32650.1, LOC_Os10g10244.1, LOC_Os10g27190.1, LOC_Os05g37330.1, LOC…
5	GO:0019538	protein metabolic process	biological_process	115	LOC_Os02g32030.1, LOC_Os09g31019.1, LOC_Os09g31031.2, LOC_Os12g07010.1, LOC_Os01g01060.1, LOC_Os02g01560.1, LOC_Os03g38000.2, LOC_Os08g03640.1, LOC_Os03g59310.1, LOC_Os07g05580.1, LOC_Os03g18570.1, LOC_Os03g18580.1, LOC_Os01g73160.1, LOC_Os08g02340.1, LOC_Os03g55150.4, LOC_Os05g27940.1, LOC_Os02g27760.1, LOC_Os06g37440.1, LOC_Os04g32650.1, LOC_Os10g10244.1, LOC_Os10g27190.1, LOC_Os05g37330.1, LOC…
5	GO:0019725	cellular homeostasis	biological_process	1	LOC_Os07g08840.1
5	GO:0030154	cell differentiation	biological_process	14	LOC_Os11g06390.1, LOC_Os05g01600.1, LOC_Os10g36650.1, LOC_Os12g06660.1, LOC_Os01g64630.1, LOC_Os01g48280.1, LOC_Os02g02410.1, LOC_Os03g29190.1, LOC_Os01g08200.1, LOC_Os03g29240.1, LOC_Os03g13970.2, LOC_Os02g41860.3, LOC_Os02g47880.2, LOC_Os03g08360.4
5	GO:0043412	macromolecule modification	biological_process	59	LOC_Os05g06770.1, LOC_Os06g44080.1, LOC_Os01g13210.2, LOC_Os07g36080.3, LOC_Os01g05490.1, LOC_Os03g16860.2, LOC_Os02g18410.1, LOC_Os01g62290.1, LOC_Os02g02890.1, LOC_Os01g48280.1, LOC_Os11g01510.3, LOC_Os05g02530.1, LOC_Os01g59790.1, LOC_Os07g12170.1, LOC_Os01g42294.1, LOC_Os03g55150.4, LOC_Os03g12250.1, LOC_Os07g33110.2, LOC_Os04g46960.4, LOC_Os01g60410.3, LOC_Os01g08200.1, LOC_Os01g68950.1, LOC…
5	GO:0044260	cellular macromolecule metabolic process	biological_process	104	LOC_Os02g32030.1, LOC_Os09g31019.1, LOC_Os09g31031.2, LOC_Os12g07010.1, LOC_Os01g01060.1, LOC_Os02g01560.1, LOC_Os03g38000.2, LOC_Os08g03640.1, LOC_Os03g59310.1, LOC_Os07g05580.1, LOC_Os03g18570.1, LOC_Os03g18580.1, LOC_Os01g73160.1, LOC_Os08g02340.1, LOC_Os03g55150.4, LOC_Os05g27940.1, LOC_Os02g27760.1, LOC_Os06g37440.1, LOC_Os04g32650.1, LOC_Os10g10244.1, LOC_Os10g27190.1, LOC_Os05g37330.1, LOC…
5	GO:0048731	system development	biological_process	11	LOC_Os09g30418.1, LOC_Os08g39140.1, LOC_Os03g53190.2, LOC_Os10g28230.1, LOC_Os03g06670.1, LOC_Os03g13970.2, LOC_Os12g06610.1, LOC_Os02g50790.2, LOC_Os03g47770.1, LOC_Os07g12110.1, LOC_Os08g05690.1
5	GO:0060255	regulation of macromolecule metabolic process	biological_process	1	LOC_Os11g26850.2
6	GO:0009875	pollen-pistil interaction	biological_process	1	LOC_Os03g12150.1
6	GO:0010468	regulation of gene expression	biological_process	1	LOC_Os11g26850.2
6	GO:0034645	cellular macromolecule biosynthetic process	biological_process	35	LOC_Os02g32030.1, LOC_Os09g31019.1, LOC_Os09g31031.2, LOC_Os12g07010.1, LOC_Os01g01060.1, LOC_Os02g01560.1, LOC_Os03g38000.2, LOC_Os08g03640.1, LOC_Os03g59310.1, LOC_Os07g05580.1, LOC_Os03g18570.1, LOC_Os03g18580.1, LOC_Os01g73160.1, LOC_Os08g02340.1, LOC_Os03g55150.4, LOC_Os05g27940.1, LOC_Os02g27760.1, LOC_Os06g37440.1, LOC_Os04g32650.1, LOC_Os10g10244.1, LOC_Os10g27190.1, LOC_Os05g37330.1, LOC…
6	GO:0036211	protein modification process	biological_process	59	LOC_Os05g06770.1, LOC_Os06g44080.1, LOC_Os01g13210.2, LOC_Os07g36080.3, LOC_Os01g05490.1, LOC_Os03g16860.2, LOC_Os02g18410.1, LOC_Os01g62290.1, LOC_Os02g02890.1, LOC_Os01g48280.1, LOC_Os11g01510.3, LOC_Os05g02530.1, LOC_Os01g59790.1, LOC_Os07g12170.1, LOC_Os01g42294.1, LOC_Os03g55150.4, LOC_Os03g12250.1, LOC_Os07g33110.2, LOC_Os04g46960.4, LOC_Os01g60410.3, LOC_Os01g08200.1, LOC_Os01g68950.1, LOC…
6	GO:0044267	cellular protein metabolic process	biological_process	93	LOC_Os02g32030.1, LOC_Os09g31019.1, LOC_Os09g31031.2, LOC_Os12g07010.1, LOC_Os01g01060.1, LOC_Os02g01560.1, LOC_Os03g38000.2, LOC_Os08g03640.1, LOC_Os03g59310.1, LOC_Os07g05580.1, LOC_Os03g18570.1, LOC_Os03g18580.1, LOC_Os01g73160.1, LOC_Os08g02340.1, LOC_Os03g55150.4, LOC_Os05g27940.1, LOC_Os02g27760.1, LOC_Os06g37440.1, LOC_Os04g32650.1, LOC_Os10g10244.1, LOC_Os10g27190.1, LOC_Os05g37330.1, LOC…
6	GO:0048367	shoot system development	biological_process	11	LOC_Os09g30418.1, LOC_Os08g39140.1, LOC_Os03g53190.2, LOC_Os10g28230.1, LOC_Os03g06670.1, LOC_Os03g13970.2, LOC_Os12g06610.1, LOC_Os02g50790.2, LOC_Os03g47770.1, LOC_Os07g12110.1, LOC_Os08g05690.1
6	GO:0061458	reproductive system development	biological_process	11	LOC_Os09g30418.1, LOC_Os08g39140.1, LOC_Os03g53190.2, LOC_Os10g28230.1, LOC_Os03g06670.1, LOC_Os03g13970.2, LOC_Os12g06610.1, LOC_Os02g50790.2, LOC_Os03g47770.1, LOC_Os07g12110.1, LOC_Os08g05690.1
6	GO:0090304	nucleic acid metabolic process	biological_process	11	LOC_Os12g43600.1, LOC_Os05g49860.1, LOC_Os08g38300.1, LOC_Os06g15360.1, LOC_Os05g38640.1, LOC_Os07g36140.1, LOC_Os12g25120.1, LOC_Os03g27310.2, LOC_Os11g05730.1, LOC_Os02g37920.1, LOC_Os06g07210.1
7	GO:0006259	DNA metabolic process	biological_process	11	LOC_Os12g43600.1, LOC_Os05g49860.1, LOC_Os08g38300.1, LOC_Os06g15360.1, LOC_Os05g38640.1, LOC_Os07g36140.1, LOC_Os12g25120.1, LOC_Os03g27310.2, LOC_Os11g05730.1, LOC_Os02g37920.1, LOC_Os06g07210.1
7	GO:0006412	translation	biological_process	35	LOC_Os02g32030.1, LOC_Os09g31019.1, LOC_Os09g31031.2, LOC_Os12g07010.1, LOC_Os01g01060.1, LOC_Os02g01560.1, LOC_Os03g38000.2, LOC_Os08g03640.1, LOC_Os03g59310.1, LOC_Os07g05580.1, LOC_Os03g18570.1, LOC_Os03g18580.1, LOC_Os01g73160.1, LOC_Os08g02340.1, LOC_Os03g55150.4, LOC_Os05g27940.1, LOC_Os02g27760.1, LOC_Os06g37440.1, LOC_Os04g32650.1, LOC_Os10g10244.1, LOC_Os10g27190.1, LOC_Os05g37330.1, LOC…
7	GO:0006464	cellular protein modification process	biological_process	59	LOC_Os05g06770.1, LOC_Os06g44080.1, LOC_Os01g13210.2, LOC_Os07g36080.3, LOC_Os01g05490.1, LOC_Os03g16860.2, LOC_Os02g18410.1, LOC_Os01g62290.1, LOC_Os02g02890.1, LOC_Os01g48280.1, LOC_Os11g01510.3, LOC_Os05g02530.1, LOC_Os01g59790.1, LOC_Os07g12170.1, LOC_Os01g42294.1, LOC_Os03g55150.4, LOC_Os03g12250.1, LOC_Os07g33110.2, LOC_Os04g46960.4, LOC_Os01g60410.3, LOC_Os01g08200.1, LOC_Os01g68950.1, LOC…
7	GO:0040029	regulation of gene expression, epigenetic	biological_process	1	LOC_Os11g26850.2
7	GO:0048608	reproductive structure development	biological_process	11	LOC_Os09g30418.1, LOC_Os08g39140.1, LOC_Os03g53190.2, LOC_Os10g28230.1, LOC_Os03g06670.1, LOC_Os03g13970.2, LOC_Os12g06610.1, LOC_Os02g50790.2, LOC_Os03g47770.1, LOC_Os07g12110.1, LOC_Os08g05690.1
8	GO:0009908	flower development	biological_process	11	LOC_Os09g30418.1, LOC_Os08g39140.1, LOC_Os03g53190.2, LOC_Os10g28230.1, LOC_Os03g06670.1, LOC_Os03g13970.2, LOC_Os12g06610.1, LOC_Os02g50790.2, LOC_Os03g47770.1, LOC_Os07g12110.1, LOC_Os08g05690.1

## Sheet: MF
Level	GO ID	Term	Type	#Seqs	Rice Locus Name
2	GO:0001071	nucleic acid binding transcription factor activity	molecular_function	6	LOC_Os06g51220.2, LOC_Os04g47690.1, LOC_Os02g07930.1, LOC_Os03g15790.1, LOC_Os05g08970.1, LOC_Os08g17400.1
2	GO:0003824	catalytic activity	molecular_function	196	LOC_Os08g02120.1, LOC_Os01g42294.1, LOC_Os03g12250.1, LOC_Os07g33110.2, LOC_Os04g57400.1, LOC_Os07g43170.3, LOC_Os07g31280.1, LOC_Os04g23890.3, LOC_Os05g33570.2, LOC_Os05g34270.1, LOC_Os03g50450.1, LOC_Os05g44770.1, LOC_Os07g35310.1, LOC_Os02g40240.1, LOC_Os03g12150.1, LOC_Os04g30240.1, LOC_Os05g04520.1, LOC_Os05g32570.1, LOC_Os06g05860.1, LOC_Os06g22060.1, LOC_Os03g28330.4, LOC_Os06g04270.1, LOC…
2	GO:0004872	receptor activity	molecular_function	2	LOC_Os03g13970.2, LOC_Os04g23890.3
2	GO:0005198	structural molecule activity	molecular_function	35	LOC_Os05g06770.1, LOC_Os11g06390.1, LOC_Os05g01600.1, LOC_Os03g50885.1, LOC_Os10g36650.1, LOC_Os09g31019.1, LOC_Os09g31031.2, LOC_Os12g06660.1, LOC_Os01g64630.1, LOC_Os11g01380.1, LOC_Os12g07010.1, LOC_Os01g01060.1, LOC_Os02g01560.1, LOC_Os03g38000.2, LOC_Os08g03640.1, LOC_Os03g59310.1, LOC_Os06g51220.2, LOC_Os07g05580.1, LOC_Os02g47140.2, LOC_Os03g18570.1, LOC_Os03g18580.1, LOC_Os01g73160.1, LOC…
2	GO:0005215	transporter activity	molecular_function	30	LOC_Os04g56160.1, LOC_Os05g35460.1, LOC_Os06g45120.2, LOC_Os06g37180.1, LOC_Os01g65880.1, LOC_Os07g26690.1, LOC_Os01g65380.1, LOC_Os02g07870.1, LOC_Os10g10500.1, LOC_Os02g46962.3, LOC_Os02g44630.2, LOC_Os10g42724.1, LOC_Os06g43660.3, LOC_Os10g30790.2, LOC_Os03g14690.1, LOC_Os02g41860.3, LOC_Os07g45300.1, LOC_Os03g07480.3, LOC_Os01g12880.1, LOC_Os01g14950.1, LOC_Os01g46980.1, LOC_Os03g02150.2, LOC…
2	GO:0005488	binding	molecular_function	229	LOC_Os01g45274.1, LOC_Os09g30418.1, LOC_Os08g39140.1, LOC_Os04g56160.1, LOC_Os10g30580.1, LOC_Os01g13210.2, LOC_Os03g05730.1, LOC_Os11g06390.1, LOC_Os05g01600.1, LOC_Os11g47760.1, LOC_Os07g04840.1, LOC_Os08g27840.1, LOC_Os10g36650.1, LOC_Os03g16860.2, LOC_Os06g40640.1, LOC_Os12g06660.1, LOC_Os02g18410.1, LOC_Os06g01500.1, LOC_Os01g64630.1, LOC_Os01g62290.1, LOC_Os03g60620.1, LOC_Os03g50290.2, LOC…
2	GO:0030234	enzyme regulator activity	molecular_function	8	LOC_Os04g35570.1, LOC_Os01g59790.1, LOC_Os07g12170.1, LOC_Os01g58890.1, LOC_Os07g31280.1, LOC_Os05g46560.2, LOC_Os02g52430.2, LOC_Os07g37750.1
2	GO:0060089	molecular transducer activity	molecular_function	4	LOC_Os05g41210.1, LOC_Os03g13970.2, LOC_Os04g23890.3, LOC_Os11g02610.1
3	GO:0003682	chromatin binding	molecular_function	5	LOC_Os06g51220.2, LOC_Os04g35570.1, LOC_Os04g47690.1, LOC_Os04g33780.1, LOC_Os11g04890.1
3	GO:0003700	sequence-specific DNA binding transcription factor activity	molecular_function	6	LOC_Os06g51220.2, LOC_Os04g47690.1, LOC_Os02g07930.1, LOC_Os03g15790.1, LOC_Os05g08970.1, LOC_Os08g17400.1
3	GO:0004871	signal transducer activity	molecular_function	4	LOC_Os05g41210.1, LOC_Os03g13970.2, LOC_Os04g23890.3, LOC_Os11g02610.1
3	GO:0005515	protein binding	molecular_function	111	LOC_Os01g45274.1, LOC_Os09g30418.1, LOC_Os08g39140.1, LOC_Os04g56160.1, LOC_Os10g30580.1, LOC_Os01g13210.2, LOC_Os03g05730.1, LOC_Os11g06390.1, LOC_Os05g01600.1, LOC_Os11g47760.1, LOC_Os07g04840.1, LOC_Os08g27840.1, LOC_Os10g36650.1, LOC_Os03g16860.2, LOC_Os06g40640.1, LOC_Os12g06660.1, LOC_Os02g18410.1, LOC_Os06g01500.1, LOC_Os01g64630.1, LOC_Os01g62290.1, LOC_Os03g60620.1, LOC_Os03g50290.2, LOC…
3	GO:0008289	lipid binding	molecular_function	8	LOC_Os01g13210.2, LOC_Os02g18410.1, LOC_Os01g07760.1, LOC_Os03g61930.3, LOC_Os08g06550.1, LOC_Os05g31750.1, LOC_Os03g16800.1, LOC_Os07g22640.1
3	GO:0016740	transferase activity	molecular_function	54	LOC_Os08g02120.1, LOC_Os01g42294.1, LOC_Os03g12250.1, LOC_Os07g33110.2, LOC_Os04g57400.1, LOC_Os07g43170.3, LOC_Os07g31280.1, LOC_Os04g23890.3, LOC_Os05g33570.2, LOC_Os05g34270.1, LOC_Os03g50450.1, LOC_Os05g44770.1, LOC_Os07g35310.1, LOC_Os02g40240.1, LOC_Os03g12150.1, LOC_Os04g30240.1, LOC_Os05g04520.1, LOC_Os05g32570.1, LOC_Os06g05860.1, LOC_Os06g22060.1, LOC_Os03g28330.4, LOC_Os06g04270.1, LOC…
3	GO:0016787	hydrolase activity	molecular_function	53	LOC_Os11g26850.2, LOC_Os09g30418.1, LOC_Os08g39140.1, LOC_Os04g56160.1, LOC_Os10g30580.1, LOC_Os03g05730.1, LOC_Os01g64660.2, LOC_Os06g45120.2, LOC_Os06g37180.1, LOC_Os01g07760.1, LOC_Os02g07870.1, LOC_Os12g44150.1, LOC_Os10g10500.1, LOC_Os07g49330.3, LOC_Os02g58340.1, LOC_Os03g20630.1, LOC_Os11g16590.1, LOC_Os02g04100.1, LOC_Os01g27880.1, LOC_Os07g09340.1, LOC_Os05g49890.2, LOC_Os06g07878.1, LOC…
3	GO:0019825	oxygen binding	molecular_function	4	LOC_Os03g12500.1, LOC_Os01g52790.1, LOC_Os02g12680.1, LOC_Os06g19070.1
3	GO:0030246	carbohydrate binding	molecular_function	3	LOC_Os03g12150.1, LOC_Os05g37450.1, LOC_Os07g46790.1
3	GO:0036094	small molecule binding	molecular_function	49	LOC_Os09g30418.1, LOC_Os08g39140.1, LOC_Os11g47760.1, LOC_Os03g16860.2, LOC_Os01g62290.1, LOC_Os03g60620.1, LOC_Os10g28200.1, LOC_Os03g55070.1, LOC_Os06g45120.2, LOC_Os12g25690.1, LOC_Os12g25700.2, LOC_Os06g37180.1, LOC_Os02g02410.1, LOC_Os11g37890.1, LOC_Os01g49290.1, LOC_Os02g07870.1, LOC_Os06g02144.2, LOC_Os01g59790.1, LOC_Os07g12170.1, LOC_Os01g42294.1, LOC_Os11g16590.1, LOC_Os03g12250.1, LOC…
3	GO:0097159	organic cyclic compound binding	molecular_function	95	LOC_Os09g30418.1, LOC_Os08g39140.1, LOC_Os11g47760.1, LOC_Os03g16860.2, LOC_Os01g62290.1, LOC_Os03g60620.1, LOC_Os10g28200.1, LOC_Os03g55070.1, LOC_Os06g45120.2, LOC_Os12g25690.1, LOC_Os12g25700.2, LOC_Os06g37180.1, LOC_Os02g02410.1, LOC_Os11g37890.1, LOC_Os01g49290.1, LOC_Os02g07870.1, LOC_Os06g02144.2, LOC_Os01g59790.1, LOC_Os07g12170.1, LOC_Os01g42294.1, LOC_Os11g16590.1, LOC_Os03g12250.1, LOC…
3	GO:1901363	heterocyclic compound binding	molecular_function	95	LOC_Os09g30418.1, LOC_Os08g39140.1, LOC_Os11g47760.1, LOC_Os03g16860.2, LOC_Os01g62290.1, LOC_Os03g60620.1, LOC_Os10g28200.1, LOC_Os03g55070.1, LOC_Os06g45120.2, LOC_Os12g25690.1, LOC_Os12g25700.2, LOC_Os06g37180.1, LOC_Os02g02410.1, LOC_Os11g37890.1, LOC_Os01g49290.1, LOC_Os02g07870.1, LOC_Os06g02144.2, LOC_Os01g59790.1, LOC_Os07g12170.1, LOC_Os01g42294.1, LOC_Os11g16590.1, LOC_Os03g12250.1, LOC…
4	GO:0003676	nucleic acid binding	molecular_function	51	LOC_Os07g04840.1, LOC_Os02g01150.2, LOC_Os12g43600.1, LOC_Os03g38000.2, LOC_Os05g45660.2, LOC_Os01g52390.1, LOC_Os06g04290.1, LOC_Os03g14530.1, LOC_Os10g08930.1, LOC_Os02g14780.2, LOC_Os02g35950.1, LOC_Os04g52200.1, LOC_Os07g18050.1, LOC_Os02g32030.1, LOC_Os03g55150.4, LOC_Os06g37440.1, LOC_Os08g22354.2, LOC_Os09g02700.1, LOC_Os10g41960.1, LOC_Os04g42600.2, LOC_Os06g23440.1, LOC_Os07g03230.1, LOC…
4	GO:0005102	receptor binding	molecular_function	1	LOC_Os05g34270.1
4	GO:0016772	transferase activity, transferring phosphorus-containing groups	molecular_function	20	LOC_Os08g02120.1, LOC_Os01g42294.1, LOC_Os03g12250.1, LOC_Os07g33110.2, LOC_Os04g57400.1, LOC_Os07g43170.3, LOC_Os07g31280.1, LOC_Os04g23890.3, LOC_Os05g33570.2, LOC_Os05g34270.1, LOC_Os03g50450.1, LOC_Os05g44770.1, LOC_Os07g35310.1, LOC_Os02g40240.1, LOC_Os03g12150.1, LOC_Os04g30240.1, LOC_Os05g04520.1, LOC_Os05g32570.1, LOC_Os06g05860.1, LOC_Os06g22060.1
4	GO:1901265	nucleoside phosphate binding	molecular_function	49	LOC_Os09g30418.1, LOC_Os08g39140.1, LOC_Os11g47760.1, LOC_Os03g16860.2, LOC_Os01g62290.1, LOC_Os03g60620.1, LOC_Os10g28200.1, LOC_Os03g55070.1, LOC_Os06g45120.2, LOC_Os12g25690.1, LOC_Os12g25700.2, LOC_Os06g37180.1, LOC_Os02g02410.1, LOC_Os11g37890.1, LOC_Os01g49290.1, LOC_Os02g07870.1, LOC_Os06g02144.2, LOC_Os01g59790.1, LOC_Os07g12170.1, LOC_Os01g42294.1, LOC_Os11g16590.1, LOC_Os03g12250.1, LOC…
5	GO:0000166	nucleotide binding	molecular_function	49	LOC_Os09g30418.1, LOC_Os08g39140.1, LOC_Os11g47760.1, LOC_Os03g16860.2, LOC_Os01g62290.1, LOC_Os03g60620.1, LOC_Os10g28200.1, LOC_Os03g55070.1, LOC_Os06g45120.2, LOC_Os12g25690.1, LOC_Os12g25700.2, LOC_Os06g37180.1, LOC_Os02g02410.1, LOC_Os11g37890.1, LOC_Os01g49290.1, LOC_Os02g07870.1, LOC_Os06g02144.2, LOC_Os01g59790.1, LOC_Os07g12170.1, LOC_Os01g42294.1, LOC_Os11g16590.1, LOC_Os03g12250.1, LOC…
5	GO:0003677	DNA binding	molecular_function	25	LOC_Os10g08550.3, LOC_Os04g45070.1, LOC_Os12g43600.1, LOC_Os05g49860.1, LOC_Os03g53190.2, LOC_Os08g38300.1, LOC_Os10g28230.1, LOC_Os05g38640.1, LOC_Os06g51220.2, LOC_Os03g06670.1, LOC_Os07g36140.1, LOC_Os12g25120.1, LOC_Os03g02040.1, LOC_Os03g27310.2, LOC_Os11g05730.1, LOC_Os04g47690.1, LOC_Os02g37920.1, LOC_Os03g59360.1, LOC_Os05g51480.1, LOC_Os07g07690.2, LOC_Os07g22640.1, LOC_Os07g38170.1, LOC…
5	GO:0003723	RNA binding	molecular_function	23	LOC_Os07g04840.1, LOC_Os02g01150.2, LOC_Os12g43600.1, LOC_Os03g38000.2, LOC_Os05g45660.2, LOC_Os01g52390.1, LOC_Os06g04290.1, LOC_Os03g14530.1, LOC_Os10g08930.1, LOC_Os02g14780.2, LOC_Os02g35950.1, LOC_Os04g52200.1, LOC_Os07g18050.1, LOC_Os02g32030.1, LOC_Os03g55150.4, LOC_Os06g37440.1, LOC_Os08g22354.2, LOC_Os09g02700.1, LOC_Os10g41960.1, LOC_Os04g42600.2, LOC_Os06g23440.1, LOC_Os07g03230.1, LOC…
5	GO:0016301	kinase activity	molecular_function	20	LOC_Os08g02120.1, LOC_Os01g42294.1, LOC_Os03g12250.1, LOC_Os07g33110.2, LOC_Os04g57400.1, LOC_Os07g43170.3, LOC_Os07g31280.1, LOC_Os04g23890.3, LOC_Os05g33570.2, LOC_Os05g34270.1, LOC_Os03g50450.1, LOC_Os05g44770.1, LOC_Os07g35310.1, LOC_Os02g40240.1, LOC_Os03g12150.1, LOC_Os04g30240.1, LOC_Os05g04520.1, LOC_Os05g32570.1, LOC_Os06g05860.1, LOC_Os06g22060.1
6	GO:0008135	translation factor activity, nucleic acid binding	molecular_function	10	LOC_Os02g32030.1, LOC_Os03g55150.4, LOC_Os06g37440.1, LOC_Os08g22354.2, LOC_Os09g02700.1, LOC_Os10g41960.1, LOC_Os04g42600.2, LOC_Os06g23440.1, LOC_Os07g03230.1, LOC_Os07g12110.1

## Sheet: CC
Level	GO ID	Term	Type	#Seqs	Rice Locus Name
2	GO:0005576	extracellular region	cellular_component	24	LOC_Os01g45274.1, LOC_Os12g42876.1, LOC_Os12g17600.1, LOC_Os12g42884.3, LOC_Os10g08550.3, LOC_Os03g57220.2, LOC_Os08g03290.1, LOC_Os02g38920.1, LOC_Os11g47760.1, LOC_Os07g04840.1, LOC_Os08g27840.1, LOC_Os01g05490.1, LOC_Os07g05820.1, LOC_Os02g01150.2, LOC_Os03g60620.1, LOC_Os02g14770.4, LOC_Os01g46610.1, LOC_Os09g14670.1, LOC_Os12g42980.1, LOC_Os01g60190.2, LOC_Os01g55350.1, LOC_Os01g11054.2, LOC…
2	GO:0005623	cell	cellular_component	326	LOC_Os04g40950.1, LOC_Os09g30418.1, LOC_Os08g39140.1, LOC_Os10g30580.1, LOC_Os03g05730.1, LOC_Os11g06390.1, LOC_Os05g01600.1, LOC_Os11g47760.1, LOC_Os10g36650.1, LOC_Os01g05490.1, LOC_Os03g16860.2, LOC_Os12g06660.1, LOC_Os01g22010.3, LOC_Os01g64630.1, LOC_Os01g62290.1, LOC_Os03g60620.1, LOC_Os05g04510.1, LOC_Os03g17690.1, LOC_Os03g40270.1, LOC_Os07g49400.1, LOC_Os03g55070.1, LOC_Os06g45120.2, LOC…
2	GO:0016020	membrane	cellular_component	174	LOC_Os03g28330.4, LOC_Os12g42876.1, LOC_Os04g40950.1, LOC_Os12g42884.3, LOC_Os11g26850.2, LOC_Os06g44080.1, LOC_Os04g56160.1, LOC_Os10g08550.3, LOC_Os06g09450.4, LOC_Os08g03290.1, LOC_Os01g13210.2, LOC_Os02g38920.1, LOC_Os02g32030.1, LOC_Os11g06390.1, LOC_Os05g01600.1, LOC_Os11g47760.1, LOC_Os03g50885.1, LOC_Os10g36650.1, LOC_Os01g05490.1, LOC_Os03g16860.2, LOC_Os12g06660.1, LOC_Os01g67860.1, LOC…
2	GO:0031974	membrane-enclosed lumen	cellular_component	27	LOC_Os01g06290.3, LOC_Os05g08970.1, LOC_Os11g04890.1, LOC_Os04g40950.1, LOC_Os02g32030.1, LOC_Os11g06390.1, LOC_Os05g01600.1, LOC_Os11g47760.1, LOC_Os10g36650.1, LOC_Os09g31019.1, LOC_Os09g31031.2, LOC_Os12g06660.1, LOC_Os01g64630.1, LOC_Os03g60620.1, LOC_Os02g02410.1, LOC_Os12g07010.1, LOC_Os08g38300.1, LOC_Os02g01560.1, LOC_Os01g49290.1, LOC_Os02g47140.2, LOC_Os05g37330.1, LOC_Os02g13530.1, LOC…
2	GO:0032991	macromolecular complex	cellular_component	31	LOC_Os12g17600.1, LOC_Os05g06770.1, LOC_Os03g57220.2, LOC_Os11g47760.1, LOC_Os09g31019.1, LOC_Os09g31031.2, LOC_Os07g05820.1, LOC_Os03g60620.1, LOC_Os03g40270.1, LOC_Os12g07010.1, LOC_Os01g01060.1, LOC_Os02g01560.1, LOC_Os03g38000.2, LOC_Os08g03640.1, LOC_Os03g59310.1, LOC_Os07g05580.1, LOC_Os02g47140.2, LOC_Os03g18570.1, LOC_Os03g18580.1, LOC_Os01g73160.1, LOC_Os08g02340.1, LOC_Os05g27940.1, LOC…
2	GO:0043226	organelle	cellular_component	211	LOC_Os12g42876.1, LOC_Os12g42884.3, LOC_Os03g57220.2, LOC_Os07g05820.1, LOC_Os02g01150.2, LOC_Os08g09250.1, LOC_Os12g43600.1, LOC_Os12g42980.1, LOC_Os09g07830.2, LOC_Os06g02144.2, LOC_Os03g20630.1, LOC_Os03g28330.4, LOC_Os11g26850.2, LOC_Os04g56160.1, LOC_Os06g09450.4, LOC_Os08g03290.1, LOC_Os01g13210.2, LOC_Os02g38920.1, LOC_Os02g32030.1, LOC_Os11g47760.1, LOC_Os01g05490.1, LOC_Os03g16860.2, LOC…
3	GO:0043227	membrane-bounded organelle	cellular_component	199	LOC_Os12g42876.1, LOC_Os12g42884.3, LOC_Os03g57220.2, LOC_Os07g05820.1, LOC_Os02g01150.2, LOC_Os08g09250.1, LOC_Os12g43600.1, LOC_Os12g42980.1, LOC_Os09g07830.2, LOC_Os06g02144.2, LOC_Os03g20630.1, LOC_Os03g28330.4, LOC_Os11g26850.2, LOC_Os04g56160.1, LOC_Os06g09450.4, LOC_Os08g03290.1, LOC_Os01g13210.2, LOC_Os02g38920.1, LOC_Os02g32030.1, LOC_Os11g47760.1, LOC_Os01g05490.1, LOC_Os03g16860.2, LOC…
3	GO:0043228	non-membrane-bounded organelle	cellular_component	48	LOC_Os11g06390.1, LOC_Os05g01600.1, LOC_Os03g50885.1, LOC_Os10g36650.1, LOC_Os12g06660.1, LOC_Os01g64630.1, LOC_Os06g17440.1, LOC_Os12g17600.1, LOC_Os05g06770.1, LOC_Os03g57220.2, LOC_Os11g47760.1, LOC_Os09g31019.1, LOC_Os09g31031.2, LOC_Os07g05820.1, LOC_Os03g60620.1, LOC_Os03g40270.1, LOC_Os12g07010.1, LOC_Os01g01060.1, LOC_Os02g01560.1, LOC_Os03g38000.2, LOC_Os08g03640.1, LOC_Os03g59310.1, LOC…
3	GO:0044422	organelle part	cellular_component	33	LOC_Os01g06290.3, LOC_Os05g08970.1, LOC_Os11g04890.1, LOC_Os04g40950.1, LOC_Os02g32030.1, LOC_Os11g06390.1, LOC_Os05g01600.1, LOC_Os11g47760.1, LOC_Os10g36650.1, LOC_Os09g31019.1, LOC_Os09g31031.2, LOC_Os12g06660.1, LOC_Os01g64630.1, LOC_Os03g60620.1, LOC_Os02g02410.1, LOC_Os12g07010.1, LOC_Os08g38300.1, LOC_Os02g01560.1, LOC_Os01g49290.1, LOC_Os02g47140.2, LOC_Os05g37330.1, LOC_Os02g13530.1, LOC…
3	GO:0044464	cell part	cellular_component	319	LOC_Os04g40950.1, LOC_Os09g30418.1, LOC_Os08g39140.1, LOC_Os10g30580.1, LOC_Os03g05730.1, LOC_Os11g06390.1, LOC_Os05g01600.1, LOC_Os11g47760.1, LOC_Os10g36650.1, LOC_Os01g05490.1, LOC_Os03g16860.2, LOC_Os12g06660.1, LOC_Os01g22010.3, LOC_Os01g64630.1, LOC_Os01g62290.1, LOC_Os03g60620.1, LOC_Os05g04510.1, LOC_Os03g17690.1, LOC_Os03g40270.1, LOC_Os07g49400.1, LOC_Os03g55070.1, LOC_Os06g45120.2, LOC…
4	GO:0005622	intracellular	cellular_component	287	LOC_Os12g42876.1, LOC_Os12g42884.3, LOC_Os03g57220.2, LOC_Os07g05820.1, LOC_Os02g01150.2, LOC_Os08g09250.1, LOC_Os12g43600.1, LOC_Os12g42980.1, LOC_Os09g07830.2, LOC_Os06g02144.2, LOC_Os03g20630.1, LOC_Os03g28330.4, LOC_Os11g26850.2, LOC_Os04g56160.1, LOC_Os06g09450.4, LOC_Os08g03290.1, LOC_Os01g13210.2, LOC_Os02g38920.1, LOC_Os02g32030.1, LOC_Os11g47760.1, LOC_Os01g05490.1, LOC_Os03g16860.2, LOC…
4	GO:0012505	endomembrane system	cellular_component	7	LOC_Os03g50290.2, LOC_Os02g36974.4, LOC_Os08g33370.2, LOC_Os11g34450.1, LOC_Os05g46560.2, LOC_Os02g50790.2, LOC_Os07g22640.1
4	GO:0031975	envelope	cellular_component	7	LOC_Os03g50290.2, LOC_Os02g36974.4, LOC_Os08g33370.2, LOC_Os11g34450.1, LOC_Os05g46560.2, LOC_Os02g50790.2, LOC_Os07g22640.1
4	GO:0043233	organelle lumen	cellular_component	27	LOC_Os01g06290.3, LOC_Os05g08970.1, LOC_Os11g04890.1, LOC_Os04g40950.1, LOC_Os02g32030.1, LOC_Os11g06390.1, LOC_Os05g01600.1, LOC_Os11g47760.1, LOC_Os10g36650.1, LOC_Os09g31019.1, LOC_Os09g31031.2, LOC_Os12g06660.1, LOC_Os01g64630.1, LOC_Os03g60620.1, LOC_Os02g02410.1, LOC_Os12g07010.1, LOC_Os08g38300.1, LOC_Os02g01560.1, LOC_Os01g49290.1, LOC_Os02g47140.2, LOC_Os05g37330.1, LOC_Os02g13530.1, LOC…
4	GO:0071944	cell periphery	cellular_component	139	LOC_Os04g40950.1, LOC_Os09g30418.1, LOC_Os08g39140.1, LOC_Os10g30580.1, LOC_Os03g05730.1, LOC_Os11g06390.1, LOC_Os05g01600.1, LOC_Os11g47760.1, LOC_Os10g36650.1, LOC_Os01g05490.1, LOC_Os03g16860.2, LOC_Os12g06660.1, LOC_Os01g22010.3, LOC_Os01g64630.1, LOC_Os01g62290.1, LOC_Os03g60620.1, LOC_Os05g04510.1, LOC_Os03g17690.1, LOC_Os03g40270.1, LOC_Os07g49400.1, LOC_Os03g55070.1, LOC_Os06g45120.2, LOC…
5	GO:0005886	plasma membrane	cellular_component	128	LOC_Os03g28330.4, LOC_Os12g42876.1, LOC_Os04g40950.1, LOC_Os12g42884.3, LOC_Os11g26850.2, LOC_Os06g44080.1, LOC_Os04g56160.1, LOC_Os10g08550.3, LOC_Os06g09450.4, LOC_Os08g03290.1, LOC_Os01g13210.2, LOC_Os02g38920.1, LOC_Os02g32030.1, LOC_Os11g06390.1, LOC_Os05g01600.1, LOC_Os11g47760.1, LOC_Os03g50885.1, LOC_Os10g36650.1, LOC_Os01g05490.1, LOC_Os03g16860.2, LOC_Os12g06660.1, LOC_Os01g67860.1, LOC…
5	GO:0030312	external encapsulating structure	cellular_component	38	LOC_Os04g40950.1, LOC_Os09g30418.1, LOC_Os08g39140.1, LOC_Os10g30580.1, LOC_Os03g05730.1, LOC_Os11g06390.1, LOC_Os05g01600.1, LOC_Os11g47760.1, LOC_Os10g36650.1, LOC_Os01g05490.1, LOC_Os03g16860.2, LOC_Os12g06660.1, LOC_Os01g22010.3, LOC_Os01g64630.1, LOC_Os01g62290.1, LOC_Os03g60620.1, LOC_Os05g04510.1, LOC_Os03g17690.1, LOC_Os03g40270.1, LOC_Os07g49400.1, LOC_Os03g55070.1, LOC_Os06g45120.2, LOC…
5	GO:0044424	intracellular part	cellular_component	281	LOC_Os12g42876.1, LOC_Os12g42884.3, LOC_Os03g57220.2, LOC_Os07g05820.1, LOC_Os02g01150.2, LOC_Os08g09250.1, LOC_Os12g43600.1, LOC_Os12g42980.1, LOC_Os09g07830.2, LOC_Os06g02144.2, LOC_Os03g20630.1, LOC_Os03g28330.4, LOC_Os11g26850.2, LOC_Os04g56160.1, LOC_Os06g09450.4, LOC_Os08g03290.1, LOC_Os01g13210.2, LOC_Os02g38920.1, LOC_Os02g32030.1, LOC_Os11g47760.1, LOC_Os01g05490.1, LOC_Os03g16860.2, LOC…
6	GO:0005618	cell wall	cellular_component	38	LOC_Os04g40950.1, LOC_Os09g30418.1, LOC_Os08g39140.1, LOC_Os10g30580.1, LOC_Os03g05730.1, LOC_Os11g06390.1, LOC_Os05g01600.1, LOC_Os11g47760.1, LOC_Os10g36650.1, LOC_Os01g05490.1, LOC_Os03g16860.2, LOC_Os12g06660.1, LOC_Os01g22010.3, LOC_Os01g64630.1, LOC_Os01g62290.1, LOC_Os03g60620.1, LOC_Os05g04510.1, LOC_Os03g17690.1, LOC_Os03g40270.1, LOC_Os07g49400.1, LOC_Os03g55070.1, LOC_Os06g45120.2, LOC…
6	GO:0005737	cytoplasm	cellular_component	257	LOC_Os12g42876.1, LOC_Os12g42884.3, LOC_Os03g57220.2, LOC_Os07g05820.1, LOC_Os02g01150.2, LOC_Os08g09250.1, LOC_Os12g43600.1, LOC_Os12g42980.1, LOC_Os09g07830.2, LOC_Os06g02144.2, LOC_Os03g20630.1, LOC_Os03g28330.4, LOC_Os11g26850.2, LOC_Os04g56160.1, LOC_Os06g09450.4, LOC_Os08g03290.1, LOC_Os01g13210.2, LOC_Os02g38920.1, LOC_Os02g32030.1, LOC_Os11g47760.1, LOC_Os01g05490.1, LOC_Os03g16860.2, LOC…
6	GO:0009579	thylakoid	cellular_component	11	LOC_Os01g45274.1, LOC_Os12g17600.1, LOC_Os07g36080.3, LOC_Os07g04840.1, LOC_Os03g12500.1, LOC_Os08g39850.1, LOC_Os11g16590.1, LOC_Os10g35870.1, LOC_Os04g52164.1, LOC_Os01g72800.1, LOC_Os02g12680.1
6	GO:0030529	ribonucleoprotein complex	cellular_component	31	LOC_Os12g17600.1, LOC_Os05g06770.1, LOC_Os03g57220.2, LOC_Os11g47760.1, LOC_Os09g31019.1, LOC_Os09g31031.2, LOC_Os07g05820.1, LOC_Os03g60620.1, LOC_Os03g40270.1, LOC_Os12g07010.1, LOC_Os01g01060.1, LOC_Os02g01560.1, LOC_Os03g38000.2, LOC_Os08g03640.1, LOC_Os03g59310.1, LOC_Os07g05580.1, LOC_Os02g47140.2, LOC_Os03g18570.1, LOC_Os03g18580.1, LOC_Os01g73160.1, LOC_Os08g02340.1, LOC_Os05g27940.1, LOC…
6	GO:0043229	intracellular organelle	cellular_component	211	LOC_Os12g42876.1, LOC_Os12g42884.3, LOC_Os03g57220.2, LOC_Os07g05820.1, LOC_Os02g01150.2, LOC_Os08g09250.1, LOC_Os12g43600.1, LOC_Os12g42980.1, LOC_Os09g07830.2, LOC_Os06g02144.2, LOC_Os03g20630.1, LOC_Os03g28330.4, LOC_Os11g26850.2, LOC_Os04g56160.1, LOC_Os06g09450.4, LOC_Os08g03290.1, LOC_Os01g13210.2, LOC_Os02g38920.1, LOC_Os02g32030.1, LOC_Os11g47760.1, LOC_Os01g05490.1, LOC_Os03g16860.2, LOC…
7	GO:0043231	intracellular membrane-bounded organelle	cellular_component	199	LOC_Os12g42876.1, LOC_Os12g42884.3, LOC_Os03g57220.2, LOC_Os07g05820.1, LOC_Os02g01150.2, LOC_Os08g09250.1, LOC_Os12g43600.1, LOC_Os12g42980.1, LOC_Os09g07830.2, LOC_Os06g02144.2, LOC_Os03g20630.1, LOC_Os03g28330.4, LOC_Os11g26850.2, LOC_Os04g56160.1, LOC_Os06g09450.4, LOC_Os08g03290.1, LOC_Os01g13210.2, LOC_Os02g38920.1, LOC_Os02g32030.1, LOC_Os11g47760.1, LOC_Os01g05490.1, LOC_Os03g16860.2, LOC…
7	GO:0043232	intracellular non-membrane-bounded organelle	cellular_component	48	LOC_Os11g06390.1, LOC_Os05g01600.1, LOC_Os03g50885.1, LOC_Os10g36650.1, LOC_Os12g06660.1, LOC_Os01g64630.1, LOC_Os06g17440.1, LOC_Os12g17600.1, LOC_Os05g06770.1, LOC_Os03g57220.2, LOC_Os11g47760.1, LOC_Os09g31019.1, LOC_Os09g31031.2, LOC_Os07g05820.1, LOC_Os03g60620.1, LOC_Os03g40270.1, LOC_Os12g07010.1, LOC_Os01g01060.1, LOC_Os02g01560.1, LOC_Os03g38000.2, LOC_Os08g03640.1, LOC_Os03g59310.1, LOC…
7	GO:0044444	cytoplasmic part	cellular_component	248	LOC_Os12g42876.1, LOC_Os12g42884.3, LOC_Os03g57220.2, LOC_Os07g05820.1, LOC_Os02g01150.2, LOC_Os08g09250.1, LOC_Os12g43600.1, LOC_Os12g42980.1, LOC_Os09g07830.2, LOC_Os06g02144.2, LOC_Os03g20630.1, LOC_Os03g28330.4, LOC_Os11g26850.2, LOC_Os04g56160.1, LOC_Os06g09450.4, LOC_Os08g03290.1, LOC_Os01g13210.2, LOC_Os02g38920.1, LOC_Os02g32030.1, LOC_Os11g47760.1, LOC_Os01g05490.1, LOC_Os03g16860.2, LOC…
7	GO:0044446	intracellular organelle part	cellular_component	33	LOC_Os01g06290.3, LOC_Os05g08970.1, LOC_Os11g04890.1, LOC_Os04g40950.1, LOC_Os02g32030.1, LOC_Os11g06390.1, LOC_Os05g01600.1, LOC_Os11g47760.1, LOC_Os10g36650.1, LOC_Os09g31019.1, LOC_Os09g31031.2, LOC_Os12g06660.1, LOC_Os01g64630.1, LOC_Os03g60620.1, LOC_Os02g02410.1, LOC_Os12g07010.1, LOC_Os08g38300.1, LOC_Os02g01560.1, LOC_Os01g49290.1, LOC_Os02g47140.2, LOC_Os05g37330.1, LOC_Os02g13530.1, LOC…
8	GO:0005634	nucleus	cellular_component	93	LOC_Os01g06290.3, LOC_Os05g08970.1, LOC_Os11g04890.1, LOC_Os04g40950.1, LOC_Os02g32030.1, LOC_Os11g06390.1, LOC_Os05g01600.1, LOC_Os11g47760.1, LOC_Os10g36650.1, LOC_Os09g31019.1, LOC_Os09g31031.2, LOC_Os12g06660.1, LOC_Os01g64630.1, LOC_Os03g60620.1, LOC_Os02g02410.1, LOC_Os12g07010.1, LOC_Os08g38300.1, LOC_Os02g01560.1, LOC_Os01g49290.1, LOC_Os02g47140.2, LOC_Os05g37330.1, LOC_Os02g13530.1, LOC…
8	GO:0005739	mitochondrion	cellular_component	28	LOC_Os04g40950.1, LOC_Os09g30418.1, LOC_Os08g39140.1, LOC_Os10g08550.3, LOC_Os08g03290.1, LOC_Os02g38920.1, LOC_Os11g06390.1, LOC_Os05g01600.1, LOC_Os03g50885.1, LOC_Os10g36650.1, LOC_Os01g05490.1, LOC_Os03g16860.2, LOC_Os12g06660.1, LOC_Os01g67860.1, LOC_Os05g33380.1, LOC_Os01g64630.1, LOC_Os01g62290.1, LOC_Os01g07760.1, LOC_Os03g12500.1, LOC_Os08g02700.1, LOC_Os11g16590.1, LOC_Os04g32650.1, LOC…
8	GO:0005768	endosome	cellular_component	5	LOC_Os03g58840.1, LOC_Os06g43660.3, LOC_Os01g15110.1, LOC_Os05g32570.1, LOC_Os07g37750.1
8	GO:0005773	vacuole	cellular_component	53	LOC_Os03g28330.4, LOC_Os12g42876.1, LOC_Os12g42884.3, LOC_Os11g26850.2, LOC_Os04g56160.1, LOC_Os06g09450.4, LOC_Os08g03290.1, LOC_Os01g13210.2, LOC_Os02g38920.1, LOC_Os02g32030.1, LOC_Os11g47760.1, LOC_Os01g05490.1, LOC_Os03g16860.2, LOC_Os02g18410.1, LOC_Os01g62290.1, LOC_Os03g60620.1, LOC_Os11g01380.1, LOC_Os06g45120.2, LOC_Os08g09250.1, LOC_Os12g42980.1, LOC_Os06g37180.1, LOC_Os02g02410.1, LOC…
8	GO:0005783	endoplasmic reticulum	cellular_component	14	LOC_Os06g01500.1, LOC_Os02g02410.1, LOC_Os11g32650.1, LOC_Os05g25640.1, LOC_Os02g01520.1, LOC_Os04g01250.2, LOC_Os05g46560.2, LOC_Os01g01080.2, LOC_Os02g37050.1, LOC_Os03g08360.4, LOC_Os03g12030.1, LOC_Os05g30750.1, LOC_Os07g34260.1, LOC_Os10g36848.1
8	GO:0005794	Golgi apparatus	cellular_component	12	LOC_Os03g40270.1, LOC_Os07g12170.1, LOC_Os02g46962.3, LOC_Os08g06380.1, LOC_Os10g42724.1, LOC_Os04g56520.2, LOC_Os04g23890.3, LOC_Os11g03270.1, LOC_Os01g12880.1, LOC_Os01g15110.1, LOC_Os05g32570.1, LOC_Os07g37750.1
8	GO:0005829	cytosol	cellular_component	166	LOC_Os03g28330.4, LOC_Os12g42876.1, LOC_Os04g40950.1, LOC_Os12g17600.1, LOC_Os12g42884.3, LOC_Os11g26850.2, LOC_Os05g06770.1, LOC_Os06g44080.1, LOC_Os09g30418.1, LOC_Os08g39140.1, LOC_Os10g08550.3, LOC_Os10g30580.1, LOC_Os06g09450.4, LOC_Os03g57220.2, LOC_Os08g03290.1, LOC_Os02g38920.1, LOC_Os03g05730.1, LOC_Os02g32030.1, LOC_Os11g06390.1, LOC_Os05g01600.1, LOC_Os11g47760.1, LOC_Os08g27840.1, LOC…
8	GO:0005840	ribosome	cellular_component	31	LOC_Os12g17600.1, LOC_Os05g06770.1, LOC_Os03g57220.2, LOC_Os11g47760.1, LOC_Os09g31019.1, LOC_Os09g31031.2, LOC_Os07g05820.1, LOC_Os03g60620.1, LOC_Os03g40270.1, LOC_Os12g07010.1, LOC_Os01g01060.1, LOC_Os02g01560.1, LOC_Os03g38000.2, LOC_Os08g03640.1, LOC_Os03g59310.1, LOC_Os07g05580.1, LOC_Os02g47140.2, LOC_Os03g18570.1, LOC_Os03g18580.1, LOC_Os01g73160.1, LOC_Os08g02340.1, LOC_Os05g27940.1, LOC…
8	GO:0005856	cytoskeleton	cellular_component	7	LOC_Os11g06390.1, LOC_Os05g01600.1, LOC_Os03g50885.1, LOC_Os10g36650.1, LOC_Os12g06660.1, LOC_Os01g64630.1, LOC_Os06g17440.1
8	GO:0009536	plastid	cellular_component	77	LOC_Os06g04270.1, LOC_Os01g45274.1, LOC_Os12g42876.1, LOC_Os04g40950.1, LOC_Os12g17600.1, LOC_Os12g42884.3, LOC_Os10g08550.3, LOC_Os03g57220.2, LOC_Os08g03290.1, LOC_Os01g13210.2, LOC_Os02g38920.1, LOC_Os02g32030.1, LOC_Os07g36080.3, LOC_Os11g47760.1, LOC_Os07g04840.1, LOC_Os01g05490.1, LOC_Os07g05820.1, LOC_Os06g40640.1, LOC_Os02g18410.1, LOC_Os02g01150.2, LOC_Os03g60620.1, LOC_Os03g50290.2, LOC…
8	GO:0031967	organelle envelope	cellular_component	7	LOC_Os03g50290.2, LOC_Os02g36974.4, LOC_Os08g33370.2, LOC_Os11g34450.1, LOC_Os05g46560.2, LOC_Os02g50790.2, LOC_Os07g22640.1
8	GO:0042579	microbody	cellular_component	11	LOC_Os12g42876.1, LOC_Os12g42884.3, LOC_Os03g57220.2, LOC_Os07g05820.1, LOC_Os02g01150.2, LOC_Os08g09250.1, LOC_Os12g43600.1, LOC_Os12g42980.1, LOC_Os09g07830.2, LOC_Os06g02144.2, LOC_Os03g20630.1
8	GO:0070013	intracellular organelle lumen	cellular_component	27	LOC_Os01g06290.3, LOC_Os05g08970.1, LOC_Os11g04890.1, LOC_Os04g40950.1, LOC_Os02g32030.1, LOC_Os11g06390.1, LOC_Os05g01600.1, LOC_Os11g47760.1, LOC_Os10g36650.1, LOC_Os09g31019.1, LOC_Os09g31031.2, LOC_Os12g06660.1, LOC_Os01g64630.1, LOC_Os03g60620.1, LOC_Os02g02410.1, LOC_Os12g07010.1, LOC_Os08g38300.1, LOC_Os02g01560.1, LOC_Os01g49290.1, LOC_Os02g47140.2, LOC_Os05g37330.1, LOC_Os02g13530.1, LOC…
9	GO:0005777	peroxisome	cellular_component	11	LOC_Os12g42876.1, LOC_Os12g42884.3, LOC_Os03g57220.2, LOC_Os07g05820.1, LOC_Os02g01150.2, LOC_Os08g09250.1, LOC_Os12g43600.1, LOC_Os12g42980.1, LOC_Os09g07830.2, LOC_Os06g02144.2, LOC_Os03g20630.1
9	GO:0044428	nuclear part	cellular_component	33	LOC_Os01g06290.3, LOC_Os05g08970.1, LOC_Os11g04890.1, LOC_Os04g40950.1, LOC_Os02g32030.1, LOC_Os11g06390.1, LOC_Os05g01600.1, LOC_Os11g47760.1, LOC_Os10g36650.1, LOC_Os09g31019.1, LOC_Os09g31031.2, LOC_Os12g06660.1, LOC_Os01g64630.1, LOC_Os03g60620.1, LOC_Os02g02410.1, LOC_Os12g07010.1, LOC_Os08g38300.1, LOC_Os02g01560.1, LOC_Os01g49290.1, LOC_Os02g47140.2, LOC_Os05g37330.1, LOC_Os02g13530.1, LOC…
10	GO:0005635	nuclear envelope	cellular_component	7	LOC_Os03g50290.2, LOC_Os02g36974.4, LOC_Os08g33370.2, LOC_Os11g34450.1, LOC_Os05g46560.2, LOC_Os02g50790.2, LOC_Os07g22640.1
10	GO:0031981	nuclear lumen	cellular_component	27	LOC_Os01g06290.3, LOC_Os05g08970.1, LOC_Os11g04890.1, LOC_Os04g40950.1, LOC_Os02g32030.1, LOC_Os11g06390.1, LOC_Os05g01600.1, LOC_Os11g47760.1, LOC_Os10g36650.1, LOC_Os09g31019.1, LOC_Os09g31031.2, LOC_Os12g06660.1, LOC_Os01g64630.1, LOC_Os03g60620.1, LOC_Os02g02410.1, LOC_Os12g07010.1, LOC_Os08g38300.1, LOC_Os02g01560.1, LOC_Os01g49290.1, LOC_Os02g47140.2, LOC_Os05g37330.1, LOC_Os02g13530.1, LOC…
11	GO:0005654	nucleoplasm	cellular_component	3	LOC_Os01g06290.3, LOC_Os05g08970.1, LOC_Os11g04890.1
11	GO:0005730	nucleolus	cellular_component	24	LOC_Os04g40950.1, LOC_Os02g32030.1, LOC_Os11g06390.1, LOC_Os05g01600.1, LOC_Os11g47760.1, LOC_Os10g36650.1, LOC_Os09g31019.1, LOC_Os09g31031.2, LOC_Os12g06660.1, LOC_Os01g64630.1, LOC_Os03g60620.1, LOC_Os02g02410.1, LOC_Os12g07010.1, LOC_Os08g38300.1, LOC_Os02g01560.1, LOC_Os01g49290.1, LOC_Os02g47140.2, LOC_Os05g37330.1, LOC_Os02g13530.1, LOC_Os03g59060.2, LOC_Os06g40560.1, LOC_Os02g50790.2, LOC…

## Sheet: Level2_BP
Level	GO ID	Term	Type	#Seqs	Rice Locus Name
2	GO:0009987	Cellular process	biological_process	295	LOC_Os03g12150.1, LOC_Os02g32030.1, LOC_Os09g31019.1, LOC_Os09g31031.2, LOC_Os12g07010.1, LOC_Os01g01060.1, LOC_Os02g01560.1, LOC_Os03g38000.2, LOC_Os08g03640.1, LOC_Os03g59310.1, LOC_Os07g05580.1, LOC_Os03g18570.1, LOC_Os03g18580.1, LOC_Os01g73160.1, LOC_Os08g02340.1, LOC_Os03g55150.4, LOC_Os05g27940.1, LOC_Os02g27760.1, LOC_Os06g37440.1, LOC_Os04g32650.1, LOC_Os10g10244.1, LOC_Os10g27190.1, LOC…
2	GO:0008152	Metabolic process	biological_process	290	LOC_Os02g32030.1, LOC_Os09g31019.1, LOC_Os09g31031.2, LOC_Os12g07010.1, LOC_Os01g01060.1, LOC_Os02g01560.1, LOC_Os03g38000.2, LOC_Os08g03640.1, LOC_Os03g59310.1, LOC_Os07g05580.1, LOC_Os03g18570.1, LOC_Os03g18580.1, LOC_Os01g73160.1, LOC_Os08g02340.1, LOC_Os03g55150.4, LOC_Os05g27940.1, LOC_Os02g27760.1, LOC_Os06g37440.1, LOC_Os04g32650.1, LOC_Os10g10244.1, LOC_Os10g27190.1, LOC_Os05g37330.1, LOC…
2	GO:0050896	Response to stimulus	biological_process	145	LOC_Os06g44080.1, LOC_Os10g08550.3, LOC_Os11g06390.1, LOC_Os05g01600.1, LOC_Os10g36650.1, LOC_Os12g06660.1, LOC_Os01g64630.1, LOC_Os01g64660.2, LOC_Os01g07760.1, LOC_Os01g49290.1, LOC_Os03g12500.1, LOC_Os03g61930.3, LOC_Os08g39850.1, LOC_Os10g18340.1, LOC_Os11g08300.1, LOC_Os11g32650.1, LOC_Os06g14370.3, LOC_Os04g57400.1, LOC_Os10g30790.2, LOC_Os03g13970.2, LOC_Os05g31750.1, LOC_Os02g41860.3, LOC…
2	GO:0044699	Single-organism process	biological_process	96	LOC_Os03g12150.1, LOC_Os09g30418.1, LOC_Os08g39140.1, LOC_Os03g53190.2, LOC_Os10g28230.1, LOC_Os03g06670.1, LOC_Os03g13970.2, LOC_Os12g06610.1, LOC_Os02g50790.2, LOC_Os03g47770.1, LOC_Os07g12110.1, LOC_Os08g05690.1, LOC_Os12g26290.5, LOC_Os03g27120.1, LOC_Os11g42040.1, LOC_Os02g41630.2, LOC_Os09g38030.2, LOC_Os01g48280.1, LOC_Os03g40270.1, LOC_Os06g45120.2, LOC_Os02g02410.1, LOC_Os02g07870.1, LOC…
2	GO:0032501	Multicellular organismal process	biological_process	75	LOC_Os03g12150.1, LOC_Os09g30418.1, LOC_Os08g39140.1, LOC_Os03g53190.2, LOC_Os10g28230.1, LOC_Os03g06670.1, LOC_Os03g13970.2, LOC_Os12g06610.1, LOC_Os02g50790.2, LOC_Os03g47770.1, LOC_Os07g12110.1, LOC_Os08g05690.1, LOC_Os02g41630.2, LOC_Os09g38030.2, LOC_Os01g48280.1, LOC_Os03g40270.1, LOC_Os06g45120.2, LOC_Os02g02410.1, LOC_Os02g07870.1, LOC_Os05g25640.1, LOC_Os03g29190.1, LOC_Os08g06380.1, LOC…
2	GO:0032502	Developmental process	biological_process	71	LOC_Os09g30418.1, LOC_Os08g39140.1, LOC_Os03g53190.2, LOC_Os10g28230.1, LOC_Os03g06670.1, LOC_Os03g13970.2, LOC_Os12g06610.1, LOC_Os02g50790.2, LOC_Os03g47770.1, LOC_Os07g12110.1, LOC_Os08g05690.1, LOC_Os02g41630.2, LOC_Os09g38030.2, LOC_Os01g48280.1, LOC_Os03g40270.1, LOC_Os06g45120.2, LOC_Os02g02410.1, LOC_Os02g07870.1, LOC_Os05g25640.1, LOC_Os03g29190.1, LOC_Os08g06380.1, LOC_Os06g43660.3, LOC…
2	GO:0051179	Localization	biological_process	57	LOC_Os04g56160.1, LOC_Os11g01380.1, LOC_Os05g35460.1, LOC_Os06g45120.2, LOC_Os12g43600.1, LOC_Os06g37180.1, LOC_Os01g65880.1, LOC_Os07g26690.1, LOC_Os01g65380.1, LOC_Os02g07870.1, LOC_Os12g44150.1, LOC_Os10g10500.1, LOC_Os03g61930.3, LOC_Os08g06550.1, LOC_Os11g16590.1, LOC_Os11g32650.1, LOC_Os02g46962.3, LOC_Os02g44630.2, LOC_Os03g58840.1, LOC_Os10g42724.1, LOC_Os07g09340.1, LOC_Os05g49890.2, LOC…
2	GO:0071840	Biogenesis	biological_process	51	LOC_Os11g26850.2, LOC_Os11g06390.1, LOC_Os05g01600.1, LOC_Os08g27840.1, LOC_Os03g50885.1, LOC_Os10g36650.1, LOC_Os12g06660.1, LOC_Os01g64630.1, LOC_Os09g14670.1, LOC_Os06g45120.2, LOC_Os05g49860.1, LOC_Os02g02410.1, LOC_Os08g38300.1, LOC_Os02g07870.1, LOC_Os05g38640.1, LOC_Os06g51220.2, LOC_Os01g55350.1, LOC_Os07g36140.1, LOC_Os12g25120.1, LOC_Os01g11054.2, LOC_Os03g27310.2, LOC_Os11g05730.1, LOC…
2	GO:0000003	Reproduction	biological_process	34	LOC_Os03g12150.1, LOC_Os09g30418.1, LOC_Os08g39140.1, LOC_Os03g53190.2, LOC_Os10g28230.1, LOC_Os03g06670.1, LOC_Os03g13970.2, LOC_Os12g06610.1, LOC_Os02g50790.2, LOC_Os03g47770.1, LOC_Os07g12110.1, LOC_Os08g05690.1, LOC_Os11g26850.2, LOC_Os08g03290.1, LOC_Os02g38920.1, LOC_Os03g17690.1, LOC_Os07g49400.1, LOC_Os12g43600.1, LOC_Os12g07010.1, LOC_Os09g07830.2, LOC_Os03g22120.3, LOC_Os01g08200.1, LOC…
2	GO:0065007	Biological regulation	biological_process	17	LOC_Os11g26850.2, LOC_Os05g41210.1, LOC_Os01g07760.1, LOC_Os07g49330.3, LOC_Os10g18340.1, LOC_Os01g42294.1, LOC_Os03g12250.1, LOC_Os03g13970.2, LOC_Os04g23890.3, LOC_Os05g46560.2, LOC_Os03g50450.1, LOC_Os02g40240.1, LOC_Os05g32570.1, LOC_Os08g05690.1, LOC_Os09g33930.3, LOC_Os11g02610.1, LOC_Os07g08840.1
2	GO:0040007	Growth	biological_process	17	LOC_Os05g25640.1, LOC_Os05g32570.1, LOC_Os07g37750.1, LOC_Os11g06390.1, LOC_Os05g01600.1, LOC_Os10g36650.1, LOC_Os12g06660.1, LOC_Os01g64630.1, LOC_Os03g29190.1, LOC_Os01g08200.1, LOC_Os03g29240.1, LOC_Os03g13970.2, LOC_Os02g41860.3, LOC_Os02g47880.2, LOC_Os03g12030.1, LOC_Os04g30240.1, LOC_Os10g25780.3
2	GO:0023052	Signaling	biological_process	15	LOC_Os05g41210.1, LOC_Os01g07760.1, LOC_Os07g49330.3, LOC_Os10g18340.1, LOC_Os01g42294.1, LOC_Os03g12250.1, LOC_Os03g13970.2, LOC_Os04g23890.3, LOC_Os05g46560.2, LOC_Os03g50450.1, LOC_Os02g40240.1, LOC_Os05g32570.1, LOC_Os08g05690.1, LOC_Os09g33930.3, LOC_Os11g02610.1
2	GO:0051704	Multi-organism process	biological_process	5	LOC_Os03g12150.1, LOC_Os03g29190.1, LOC_Os03g29240.1, LOC_Os11g03270.1, LOC_Os02g47880.2

## Sheet: Level2_MF
Level	GO ID	Term	Type	#Seqs	Rice Locus Name
2	GO:0005488	Binding	molecular_function	229	LOC_Os01g45274.1, LOC_Os09g30418.1, LOC_Os08g39140.1, LOC_Os04g56160.1, LOC_Os10g30580.1, LOC_Os01g13210.2, LOC_Os03g05730.1, LOC_Os11g06390.1, LOC_Os05g01600.1, LOC_Os11g47760.1, LOC_Os07g04840.1, LOC_Os08g27840.1, LOC_Os10g36650.1, LOC_Os03g16860.2, LOC_Os06g40640.1, LOC_Os12g06660.1, LOC_Os02g18410.1, LOC_Os06g01500.1, LOC_Os01g64630.1, LOC_Os01g62290.1, LOC_Os03g60620.1, LOC_Os03g50290.2, LOC…
2	GO:0003824	Catalytic activity	molecular_function	196	LOC_Os08g02120.1, LOC_Os01g42294.1, LOC_Os03g12250.1, LOC_Os07g33110.2, LOC_Os04g57400.1, LOC_Os07g43170.3, LOC_Os07g31280.1, LOC_Os04g23890.3, LOC_Os05g33570.2, LOC_Os05g34270.1, LOC_Os03g50450.1, LOC_Os05g44770.1, LOC_Os07g35310.1, LOC_Os02g40240.1, LOC_Os03g12150.1, LOC_Os04g30240.1, LOC_Os05g04520.1, LOC_Os05g32570.1, LOC_Os06g05860.1, LOC_Os06g22060.1, LOC_Os03g28330.4, LOC_Os06g04270.1, LOC…
2	GO:0005198	Structural molecule activity	molecular_function	35	LOC_Os05g06770.1, LOC_Os11g06390.1, LOC_Os05g01600.1, LOC_Os03g50885.1, LOC_Os10g36650.1, LOC_Os09g31019.1, LOC_Os09g31031.2, LOC_Os12g06660.1, LOC_Os01g64630.1, LOC_Os11g01380.1, LOC_Os12g07010.1, LOC_Os01g01060.1, LOC_Os02g01560.1, LOC_Os03g38000.2, LOC_Os08g03640.1, LOC_Os03g59310.1, LOC_Os06g51220.2, LOC_Os07g05580.1, LOC_Os02g47140.2, LOC_Os03g18570.1, LOC_Os03g18580.1, LOC_Os01g73160.1, LOC…
2	GO:0005215	Transporter activity	molecular_function	30	LOC_Os04g56160.1, LOC_Os05g35460.1, LOC_Os06g45120.2, LOC_Os06g37180.1, LOC_Os01g65880.1, LOC_Os07g26690.1, LOC_Os01g65380.1, LOC_Os02g07870.1, LOC_Os10g10500.1, LOC_Os02g46962.3, LOC_Os02g44630.2, LOC_Os10g42724.1, LOC_Os06g43660.3, LOC_Os10g30790.2, LOC_Os03g14690.1, LOC_Os02g41860.3, LOC_Os07g45300.1, LOC_Os03g07480.3, LOC_Os01g12880.1, LOC_Os01g14950.1, LOC_Os01g46980.1, LOC_Os03g02150.2, LOC…
2	GO:0030234	Enzyme regulator activity	molecular_function	8	LOC_Os04g35570.1, LOC_Os01g59790.1, LOC_Os07g12170.1, LOC_Os01g58890.1, LOC_Os07g31280.1, LOC_Os05g46560.2, LOC_Os02g52430.2, LOC_Os07g37750.1
2	GO:0001071	Nucleic acid binding transcription factor activity	molecular_function	6	LOC_Os06g51220.2, LOC_Os04g47690.1, LOC_Os02g07930.1, LOC_Os03g15790.1, LOC_Os05g08970.1, LOC_Os08g17400.1
2	GO:0060089	Molecular transducer activity	molecular_function	4	LOC_Os05g41210.1, LOC_Os03g13970.2, LOC_Os04g23890.3, LOC_Os11g02610.1
2	GO:0004872	Receptor activity	molecular_function	2	LOC_Os03g13970.2, LOC_Os04g23890.3

## Sheet: Level2_CC
Level	GO ID	Term	Type	#Seqs	Rice Locus Name
2	GO:0005623	Cell	cellular_component	326	LOC_Os04g40950.1, LOC_Os09g30418.1, LOC_Os08g39140.1, LOC_Os10g30580.1, LOC_Os03g05730.1, LOC_Os11g06390.1, LOC_Os05g01600.1, LOC_Os11g47760.1, LOC_Os10g36650.1, LOC_Os01g05490.1, LOC_Os03g16860.2, LOC_Os12g06660.1, LOC_Os01g22010.3, LOC_Os01g64630.1, LOC_Os01g62290.1, LOC_Os03g60620.1, LOC_Os05g04510.1, LOC_Os03g17690.1, LOC_Os03g40270.1, LOC_Os07g49400.1, LOC_Os03g55070.1, LOC_Os06g45120.2, LOC…
2	GO:0043226	Organelle	cellular_component	211	LOC_Os12g42876.1, LOC_Os12g42884.3, LOC_Os03g57220.2, LOC_Os07g05820.1, LOC_Os02g01150.2, LOC_Os08g09250.1, LOC_Os12g43600.1, LOC_Os12g42980.1, LOC_Os09g07830.2, LOC_Os06g02144.2, LOC_Os03g20630.1, LOC_Os03g28330.4, LOC_Os11g26850.2, LOC_Os04g56160.1, LOC_Os06g09450.4, LOC_Os08g03290.1, LOC_Os01g13210.2, LOC_Os02g38920.1, LOC_Os02g32030.1, LOC_Os11g47760.1, LOC_Os01g05490.1, LOC_Os03g16860.2, LOC…
2	GO:0016020	Membrane	cellular_component	174	LOC_Os03g28330.4, LOC_Os12g42876.1, LOC_Os04g40950.1, LOC_Os12g42884.3, LOC_Os11g26850.2, LOC_Os06g44080.1, LOC_Os04g56160.1, LOC_Os10g08550.3, LOC_Os06g09450.4, LOC_Os08g03290.1, LOC_Os01g13210.2, LOC_Os02g38920.1, LOC_Os02g32030.1, LOC_Os11g06390.1, LOC_Os05g01600.1, LOC_Os11g47760.1, LOC_Os03g50885.1, LOC_Os10g36650.1, LOC_Os01g05490.1, LOC_Os03g16860.2, LOC_Os12g06660.1, LOC_Os01g67860.1, LOC…
2	GO:0032991	Macromolecular complex	cellular_component	31	LOC_Os12g17600.1, LOC_Os05g06770.1, LOC_Os03g57220.2, LOC_Os11g47760.1, LOC_Os09g31019.1, LOC_Os09g31031.2, LOC_Os07g05820.1, LOC_Os03g60620.1, LOC_Os03g40270.1, LOC_Os12g07010.1, LOC_Os01g01060.1, LOC_Os02g01560.1, LOC_Os03g38000.2, LOC_Os08g03640.1, LOC_Os03g59310.1, LOC_Os07g05580.1, LOC_Os02g47140.2, LOC_Os03g18570.1, LOC_Os03g18580.1, LOC_Os01g73160.1, LOC_Os08g02340.1, LOC_Os05g27940.1, LOC…
2	GO:0031974	Membrane-enclosed lumen	cellular_component	27	LOC_Os01g06290.3, LOC_Os05g08970.1, LOC_Os11g04890.1, LOC_Os04g40950.1, LOC_Os02g32030.1, LOC_Os11g06390.1, LOC_Os05g01600.1, LOC_Os11g47760.1, LOC_Os10g36650.1, LOC_Os09g31019.1, LOC_Os09g31031.2, LOC_Os12g06660.1, LOC_Os01g64630.1, LOC_Os03g60620.1, LOC_Os02g02410.1, LOC_Os12g07010.1, LOC_Os08g38300.1, LOC_Os02g01560.1, LOC_Os01g49290.1, LOC_Os02g47140.2, LOC_Os05g37330.1, LOC_Os02g13530.1, LOC…
2	GO:0005576	Extracellular region	cellular_component	24	LOC_Os01g45274.1, LOC_Os12g42876.1, LOC_Os12g17600.1, LOC_Os12g42884.3, LOC_Os10g08550.3, LOC_Os03g57220.2, LOC_Os08g03290.1, LOC_Os02g38920.1, LOC_Os11g47760.1, LOC_Os07g04840.1, LOC_Os08g27840.1, LOC_Os01g05490.1, LOC_Os07g05820.1, LOC_Os02g01150.2, LOC_Os03g60620.1, LOC_Os02g14770.4, LOC_Os01g46610.1, LOC_Os09g14670.1, LOC_Os12g42980.1, LOC_Os01g60190.2, LOC_Os01g55350.1, LOC_Os01g11054.2, LOC…
